# Supplementary material for: Multivariable regulation of gene expression plasticity in metazoans
Source: Open Biol. 2019 Dec 4;9(12):190150. doi: 10.1098/rsob.190150 (PMC6936262; doi:10.1098/rsob.190150)
Supplement: Table S1 [file rsob190150supp2.xlsx]

## Sheet: Human
Gene-ID	GEP
ENSG00000115009	1.62011
ENSG00000169429	1.58622
ENSG00000169245	1.57782
ENSG00000137959	1.43249
ENSG00000169248	1.4003
ENSG00000196611	1.37649
ENSG00000185745	1.37307
ENSG00000163739	1.33726
ENSG00000134321	1.30958
ENSG00000163734	1.16772
ENSG00000123610	1.07042
ENSG00000073756	1.05633
ENSG00000163661	1.01092
ENSG00000109321	1.00722
ENSG00000143546	0.98433
ENSG00000134326	0.97783
ENSG00000136244	0.97782
ENSG00000165949	0.9681
ENSG00000171848	0.95599
ENSG00000131747	0.9366
ENSG00000119917	0.91176
ENSG00000125538	0.90736
ENSG00000179388	0.89204
ENSG00000118785	0.88114
ENSG00000197632	0.88102
ENSG00000115008	0.79615
ENSG00000170345	0.79547
ENSG00000131203	0.78315
ENSG00000119922	0.73841
ENSG00000122641	0.72336
ENSG00000122861	0.72154
ENSG00000126787	0.71636
ENSG00000153234	0.7137
ENSG00000157601	0.70289
ENSG00000168078	0.69533
ENSG00000123689	0.68996
ENSG00000163993	0.68555
ENSG00000130513	0.6652
ENSG00000108691	0.65475
ENSG00000134827	0.64111
ENSG00000078081	0.59253
ENSG00000138180	0.57171
ENSG00000121742	0.57143
ENSG00000138646	0.56782
ENSG00000140379	0.55698
ENSG00000121858	0.55499
ENSG00000165474	0.53562
ENSG00000148346	0.51381
ENSG00000135114	0.50812
ENSG00000117228	0.4989
ENSG00000187608	0.49323
ENSG00000138061	0.48712
ENSG00000147676	0.48573
ENSG00000163735	0.48163
ENSG00000151012	0.47983
ENSG00000172183	0.46081
ENSG00000131979	0.45606
ENSG00000275302	0.45138
ENSG00000133048	0.44837
ENSG00000126709	0.44483
ENSG00000271503	0.43998
ENSG00000112984	0.43777
ENSG00000141682	0.41845
ENSG00000138772	0.41292
ENSG00000124875	0.39897
ENSG00000138755	0.39631
ENSG00000125740	0.39392
ENSG00000137965	0.39014
ENSG00000120708	0.38975
ENSG00000185885	0.38932
ENSG00000168209	0.38629
ENSG00000198074	0.3824
ENSG00000118503	0.37055
ENSG00000164932	0.36726
ENSG00000107984	0.36351
ENSG00000276043	0.36169
ENSG00000102760	0.35372
ENSG00000138449	0.34801
ENSG00000081041	0.33771
ENSG00000143228	0.32908
ENSG00000187479	0.32804
ENSG00000125968	0.32502
ENSG00000166922	0.32234
ENSG00000138678	0.31907
ENSG00000166923	0.30879
ENSG00000163221	0.3057
ENSG00000165092	0.3007
ENSG00000138160	0.29917
ENSG00000108700	0.29457
ENSG00000205364	0.29104
ENSG00000152661	0.29099
ENSG00000204287	0.28861
ENSG00000148926	0.28823
ENSG00000116741	0.28751
ENSG00000120738	0.28016
ENSG00000143476	0.27694
ENSG00000173391	0.27035
ENSG00000149968	0.26899
ENSG00000117399	0.26845
ENSG00000110848	0.26187
ENSG00000104267	0.25639
ENSG00000272398	0.25272
ENSG00000112742	0.24866
ENSG00000196139	0.2457
ENSG00000164949	0.24447
ENSG00000132274	0.23532
ENSG00000072571	0.23049
ENSG00000268104	0.21794
ENSG00000138166	0.21791
ENSG00000011426	0.21374
ENSG00000170312	0.20832
ENSG00000171241	0.20437
ENSG00000106366	0.2034
ENSG00000038427	0.20276
ENSG00000137331	0.20264
ENSG00000181649	0.20124
ENSG00000137628	0.18815
ENSG00000166670	0.18561
ENSG00000080986	0.18347
ENSG00000135549	0.17082
ENSG00000118523	0.16765
ENSG00000157456	0.15823
ENSG00000125730	0.15765
ENSG00000185022	0.15023
ENSG00000134057	0.14712
ENSG00000089127	0.14705
ENSG00000168542	0.14099
ENSG00000183486	0.13619
ENSG00000139211	0.12732
ENSG00000152253	0.12643
ENSG00000145287	0.12398
ENSG00000178695	0.11897
ENSG00000086548	0.11542
ENSG00000166825	0.11299
ENSG00000163220	0.11265
ENSG00000162692	0.1113
ENSG00000137804	0.1079
ENSG00000108932	0.10266
ENSG00000117525	0.10246
ENSG00000105825	0.09908
ENSG00000156970	0.09876
ENSG00000181458	0.09745
ENSG00000163359	0.09668
ENSG00000088325	0.09153
ENSG00000162614	0.08972
ENSG00000100292	0.08966
ENSG00000138642	0.08904
ENSG00000127324	0.08852
ENSG00000109805	0.08691
ENSG00000139318	0.08503
ENSG00000121552	0.08104
ENSG00000164181	0.06226
ENSG00000170458	0.06093
ENSG00000146674	0.05949
ENSG00000070669	0.05876
ENSG00000114251	0.04046
ENSG00000090382	0.0389
ENSG00000147408	0.03693
ENSG00000205413	0.03361
ENSG00000167244	0.03355
ENSG00000135842	0.03195
ENSG00000090104	0.02596
ENSG00000117226	0.02212
ENSG00000118193	0.02186
ENSG00000144802	0.02115
ENSG00000145632	0.02044
ENSG00000122952	0.01786
ENSG00000135046	0.017
ENSG00000121966	0.01661
ENSG00000172575	0.01358
ENSG00000090889	0.01245
ENSG00000198901	0.01142
ENSG00000165304	0.00471
ENSG00000204389	0.00389
ENSG00000175063	0.00019
ENSG00000101955	-0.00971
ENSG00000262406	-0.01076
ENSG00000111335	-0.01408
ENSG00000118515	-0.01451
ENSG00000133106	-0.02011
ENSG00000135069	-0.0232
ENSG00000123496	-0.02988
ENSG00000176890	-0.03775
ENSG00000265972	-0.03861
ENSG00000129824	-0.04265
ENSG00000106484	-0.04311
ENSG00000123700	-0.04674
ENSG00000180730	-0.04838
ENSG00000113369	-0.05132
ENSG00000100526	-0.05712
ENSG00000101447	-0.05745
ENSG00000164379	-0.05811
ENSG00000117318	-0.06647
ENSG00000074527	-0.0667
ENSG00000187957	-0.07116
ENSG00000168685	-0.07345
ENSG00000196154	-0.07814
ENSG00000145824	-0.08466
ENSG00000128342	-0.08895
ENSG00000121797	-0.09188
ENSG00000145386	-0.09256
ENSG00000181634	-0.09325
ENSG00000115457	-0.09377
ENSG00000135218	-0.10086
ENSG00000099985	-0.10495
ENSG00000163808	-0.10583
ENSG00000111206	-0.10648
ENSG00000197249	-0.10779
ENSG00000136826	-0.10861
ENSG00000123975	-0.11099
ENSG00000128383	-0.1146
ENSG00000105388	-0.11514
ENSG00000133321	-0.1176
ENSG00000244734	-0.12076
ENSG00000240065	-0.1226
ENSG00000120875	-0.12433
ENSG00000131016	-0.12537
ENSG00000111247	-0.12641
ENSG00000101003	-0.12795
ENSG00000115738	-0.13109
ENSG00000102837	-0.13858
ENSG00000104327	-0.14869
ENSG00000103257	-0.15059
ENSG00000119888	-0.15072
ENSG00000114200	-0.15133
ENSG00000012223	-0.15494
ENSG00000188820	-0.15536
ENSG00000137807	-0.1592
ENSG00000106462	-0.1606
ENSG00000173467	-0.16062
ENSG00000164761	-0.16722
ENSG00000107968	-0.16879
ENSG00000136514	-0.17298
ENSG00000107201	-0.17449
ENSG00000163536	-0.18032
ENSG00000277586	-0.18162
ENSG00000197766	-0.18475
ENSG00000196616	-0.18597
ENSG00000249992	-0.18781
ENSG00000132530	-0.18935
ENSG00000184254	-0.18948
ENSG00000165072	-0.19098
ENSG00000137801	-0.191
ENSG00000165244	-0.1933
ENSG00000163565	-0.19619
ENSG00000101187	-0.19808
ENSG00000087586	-0.19929
ENSG00000129173	-0.20013
ENSG00000105835	-0.20023
ENSG00000166741	-0.20111
ENSG00000158050	-0.20196
ENSG00000170525	-0.20207
ENSG00000140450	-0.20543
ENSG00000156076	-0.20578
ENSG00000116701	-0.20709
ENSG00000164484	-0.20744
ENSG00000090339	-0.21217
ENSG00000007062	-0.2126
ENSG00000087074	-0.21536
ENSG00000005249	-0.21591
ENSG00000078401	-0.21816
ENSG00000115380	-0.21863
ENSG00000232810	-0.22018
ENSG00000138135	-0.22026
ENSG00000176907	-0.22103
ENSG00000163032	-0.22644
ENSG00000162892	-0.2338
ENSG00000135919	-0.23516
ENSG00000204388	-0.24211
ENSG00000118849	-0.24636
ENSG00000006128	-0.24739
ENSG00000115414	-0.24754
ENSG00000154589	-0.24932
ENSG00000101938	-0.25432
ENSG00000196549	-0.25668
ENSG00000100985	-0.25789
ENSG00000158164	-0.25889
ENSG00000177409	-0.25929
ENSG00000187193	-0.26072
ENSG00000180573	-0.2616
ENSG00000106560	-0.26171
ENSG00000120833	-0.26249
ENSG00000197279	-0.26418
ENSG00000156234	-0.26446
ENSG00000164120	-0.26479
ENSG00000123219	-0.27071
ENSG00000136235	-0.27123
ENSG00000106066	-0.27373
ENSG00000119508	-0.27914
ENSG00000150687	-0.28021
ENSG00000159167	-0.28175
ENSG00000139572	-0.28576
ENSG00000162645	-0.29013
ENSG00000139269	-0.29112
ENSG00000162407	-0.29628
ENSG00000204262	-0.29695
ENSG00000115590	-0.29832
ENSG00000154451	-0.29837
ENSG00000204291	-0.29848
ENSG00000106236	-0.29873
ENSG00000138778	-0.29944
ENSG00000111913	-0.30338
ENSG00000026025	-0.30481
ENSG00000153132	-0.30872
ENSG00000147852	-0.31246
ENSG00000196562	-0.31366
ENSG00000145703	-0.31412
ENSG00000211445	-0.31549
ENSG00000163563	-0.31752
ENSG00000082397	-0.31991
ENSG00000136960	-0.32081
ENSG00000176046	-0.32299
ENSG00000125845	-0.32393
ENSG00000125398	-0.32449
ENSG00000148773	-0.3274
ENSG00000164692	-0.33079
ENSG00000114346	-0.33085
ENSG00000113368	-0.33125
ENSG00000102524	-0.33159
ENSG00000132465	-0.33212
ENSG00000205403	-0.33967
ENSG00000133134	-0.34165
ENSG00000086300	-0.34205
ENSG00000170786	-0.34238
ENSG00000130303	-0.34252
ENSG00000104722	-0.34262
ENSG00000047457	-0.3432
ENSG00000138207	-0.34364
ENSG00000179639	-0.34395
ENSG00000096006	-0.34617
ENSG00000149131	-0.34692
ENSG00000112149	-0.34832
ENSG00000105974	-0.34868
ENSG00000128965	-0.34947
ENSG00000183044	-0.3508
ENSG00000204257	-0.35085
ENSG00000204103	-0.35168
ENSG00000109099	-0.35764
ENSG00000169583	-0.35964
ENSG00000185479	-0.36043
ENSG00000067715	-0.36105
ENSG00000133135	-0.36119
ENSG00000241399	-0.36344
ENSG00000186185	-0.36435
ENSG00000118777	-0.3671
ENSG00000135245	-0.37004
ENSG00000196878	-0.37219
ENSG00000026751	-0.37413
ENSG00000184588	-0.38015
ENSG00000175445	-0.38379
ENSG00000132386	-0.38398
ENSG00000171855	-0.38651
ENSG00000196352	-0.38679
ENSG00000212724	-0.38762
ENSG00000094804	-0.38955
ENSG00000019549	-0.38964
ENSG00000171004	-0.39017
ENSG00000142871	-0.39034
ENSG00000108821	-0.39147
ENSG00000177494	-0.39358
ENSG00000144959	-0.39407
ENSG00000164089	-0.39595
ENSG00000134028	-0.39762
ENSG00000117594	-0.39891
ENSG00000150681	-0.39905
ENSG00000099860	-0.40245
ENSG00000069482	-0.40327
ENSG00000102265	-0.40347
ENSG00000189058	-0.40415
ENSG00000161800	-0.40564
ENSG00000011422	-0.40612
ENSG00000176788	-0.40888
ENSG00000137673	-0.40985
ENSG00000166803	-0.40995
ENSG00000167772	-0.41008
ENSG00000112297	-0.41022
ENSG00000140465	-0.41202
ENSG00000063438	-0.4126
ENSG00000116711	-0.41302
ENSG00000182326	-0.41937
ENSG00000185507	-0.42153
ENSG00000129038	-0.42161
ENSG00000111674	-0.423
ENSG00000121211	-0.42362
ENSG00000164266	-0.42463
ENSG00000114541	-0.42664
ENSG00000183691	-0.42771
ENSG00000121152	-0.42804
ENSG00000095739	-0.42855
ENSG00000104368	-0.4288
ENSG00000004468	-0.43183
ENSG00000148671	-0.43193
ENSG00000096696	-0.43355
ENSG00000035499	-0.43471
ENSG00000163568	-0.43471
ENSG00000184678	-0.43637
ENSG00000186340	-0.43991
ENSG00000136997	-0.44064
ENSG00000128422	-0.44064
ENSG00000124882	-0.44087
ENSG00000124491	-0.44101
ENSG00000141448	-0.44556
ENSG00000112096	-0.44711
ENSG00000071539	-0.44721
ENSG00000163453	-0.4476
ENSG00000167552	-0.45111
ENSG00000177606	-0.45304
ENSG00000109472	-0.45518
ENSG00000163053	-0.45546
ENSG00000133101	-0.45914
ENSG00000198805	-0.45979
ENSG00000149591	-0.46186
ENSG00000060982	-0.46261
ENSG00000073737	-0.46915
ENSG00000183709	-0.46935
ENSG00000160862	-0.47069
ENSG00000231389	-0.47449
ENSG00000057149	-0.47519
ENSG00000172348	-0.47608
ENSG00000177575	-0.47782
ENSG00000137501	-0.47827
ENSG00000164128	-0.48016
ENSG00000163535	-0.48088
ENSG00000104147	-0.48136
ENSG00000122862	-0.48288
ENSG00000125848	-0.48584
ENSG00000124731	-0.48965
ENSG00000167755	-0.49084
ENSG00000124191	-0.49102
ENSG00000147872	-0.49131
ENSG00000102794	-0.49157
ENSG00000109255	-0.49277
ENSG00000123485	-0.4938
ENSG00000137033	-0.49508
ENSG00000113140	-0.49531
ENSG00000175183	-0.49598
ENSG00000152804	-0.49842
ENSG00000124225	-0.49846
ENSG00000064042	-0.4991
ENSG00000121005	-0.49977
ENSG00000124107	-0.50406
ENSG00000102024	-0.50459
ENSG00000117650	-0.50576
ENSG00000164125	-0.50734
ENSG00000188313	-0.50818
ENSG00000120217	-0.50892
ENSG00000104419	-0.50904
ENSG00000186377	-0.51136
ENSG00000147642	-0.51136
ENSG00000023445	-0.51198
ENSG00000186088	-0.51299
ENSG00000077152	-0.51323
ENSG00000112715	-0.51396
ENSG00000172005	-0.51428
ENSG00000101210	-0.51571
ENSG00000139970	-0.51744
ENSG00000152377	-0.51767
ENSG00000164611	-0.51779
ENSG00000165997	-0.51781
ENSG00000196754	-0.51907
ENSG00000145934	-0.51963
ENSG00000124762	-0.51998
ENSG00000149557	-0.52094
ENSG00000127561	-0.52193
ENSG00000188906	-0.52384
ENSG00000101825	-0.52415
ENSG00000113083	-0.52438
ENSG00000128567	-0.52662
ENSG00000089685	-0.52793
ENSG00000096060	-0.52957
ENSG00000162496	-0.53018
ENSG00000186310	-0.5308
ENSG00000155850	-0.53621
ENSG00000176171	-0.53629
ENSG00000047597	-0.53644
ENSG00000024526	-0.53753
ENSG00000073111	-0.53765
ENSG00000163874	-0.53799
ENSG00000079257	-0.53805
ENSG00000139055	-0.53841
ENSG00000100479	-0.53862
ENSG00000159403	-0.53881
ENSG00000142945	-0.53935
ENSG00000124785	-0.53975
ENSG00000163710	-0.54004
ENSG00000184515	-0.54059
ENSG00000132669	-0.54521
ENSG00000175305	-0.54698
ENSG00000149289	-0.54979
ENSG00000113805	-0.55027
ENSG00000121316	-0.55104
ENSG00000169715	-0.55156
ENSG00000171951	-0.55199
ENSG00000126860	-0.5526
ENSG00000112183	-0.55368
ENSG00000131981	-0.55379
ENSG00000136231	-0.55423
ENSG00000133169	-0.55453
ENSG00000152766	-0.55461
ENSG00000155090	-0.55586
ENSG00000113739	-0.55646
ENSG00000188042	-0.55935
ENSG00000174944	-0.56273
ENSG00000115828	-0.56422
ENSG00000112773	-0.56463
ENSG00000197208	-0.56482
ENSG00000163082	-0.56659
ENSG00000109846	-0.56837
ENSG00000101255	-0.571
ENSG00000160182	-0.57106
ENSG00000169908	-0.57124
ENSG00000103460	-0.57143
ENSG00000183696	-0.574
ENSG00000157404	-0.57534
ENSG00000213626	-0.57546
ENSG00000180914	-0.57585
ENSG00000100453	-0.57867
ENSG00000125347	-0.57871
ENSG00000101670	-0.58299
ENSG00000127951	-0.58457
ENSG00000134802	-0.58478
ENSG00000111348	-0.58597
ENSG00000166292	-0.58647
ENSG00000205358	-0.5866
ENSG00000203760	-0.58671
ENSG00000133636	-0.58682
ENSG00000151790	-0.58751
ENSG00000010278	-0.58922
ENSG00000125148	-0.58955
ENSG00000173890	-0.59127
ENSG00000113532	-0.59127
ENSG00000112964	-0.59401
ENSG00000164434	-0.59433
ENSG00000175197	-0.59691
ENSG00000118495	-0.59708
ENSG00000133110	-0.59747
ENSG00000186847	-0.6006
ENSG00000104413	-0.60207
ENSG00000117152	-0.60277
ENSG00000068079	-0.60294
ENSG00000137267	-0.60327
ENSG00000184731	-0.60362
ENSG00000107242	-0.60364
ENSG00000167779	-0.60384
ENSG00000171617	-0.60388
ENSG00000155324	-0.60428
ENSG00000109511	-0.60487
ENSG00000116285	-0.60608
ENSG00000074416	-0.60795
ENSG00000109906	-0.60834
ENSG00000116717	-0.60988
ENSG00000114698	-0.61041
ENSG00000187498	-0.61059
ENSG00000087303	-0.61092
ENSG00000113070	-0.61156
ENSG00000128590	-0.61162
ENSG00000144655	-0.61235
ENSG00000105246	-0.61284
ENSG00000170323	-0.61332
ENSG00000174371	-0.61352
ENSG00000175426	-0.61385
ENSG00000155792	-0.61522
ENSG00000169413	-0.61712
ENSG00000213190	-0.61717
ENSG00000185112	-0.61772
ENSG00000142089	-0.62018
ENSG00000163736	-0.62071
ENSG00000068366	-0.62147
ENSG00000137573	-0.62164
ENSG00000174125	-0.62409
ENSG00000116761	-0.62556
ENSG00000116014	-0.62607
ENSG00000141401	-0.62631
ENSG00000163017	-0.62796
ENSG00000152583	-0.63044
ENSG00000197629	-0.63077
ENSG00000169442	-0.6322
ENSG00000120885	-0.63279
ENSG00000205269	-0.63402
ENSG00000094755	-0.63458
ENSG00000186480	-0.63565
ENSG00000154734	-0.63756
ENSG00000167900	-0.63778
ENSG00000023608	-0.63857
ENSG00000159399	-0.64052
ENSG00000122691	-0.64167
ENSG00000149554	-0.64311
ENSG00000175471	-0.64318
ENSG00000170439	-0.6435
ENSG00000172201	-0.64352
ENSG00000115919	-0.64361
ENSG00000146670	-0.6448
ENSG00000054219	-0.646
ENSG00000126353	-0.64647
ENSG00000069702	-0.64803
ENSG00000134107	-0.64858
ENSG00000221869	-0.651
ENSG00000185905	-0.65254
ENSG00000146072	-0.65333
ENSG00000059804	-0.65385
ENSG00000035862	-0.65442
ENSG00000119938	-0.65506
ENSG00000101333	-0.65663
ENSG00000120129	-0.6576
ENSG00000145431	-0.65792
ENSG00000157150	-0.65833
ENSG00000117724	-0.6597
ENSG00000111817	-0.66399
ENSG00000151835	-0.66404
ENSG00000185862	-0.66504
ENSG00000104332	-0.66507
ENSG00000260314	-0.66536
ENSG00000185201	-0.66603
ENSG00000143416	-0.66958
ENSG00000109107	-0.66992
ENSG00000050730	-0.67169
ENSG00000130508	-0.67222
ENSG00000107317	-0.67261
ENSG00000100906	-0.6728
ENSG00000141753	-0.67282
ENSG00000135480	-0.67372
ENSG00000136048	-0.67429
ENSG00000000971	-0.67752
ENSG00000106541	-0.67754
ENSG00000184564	-0.6793
ENSG00000102445	-0.67948
ENSG00000043355	-0.68057
ENSG00000111537	-0.68112
ENSG00000072422	-0.68186
ENSG00000140853	-0.68302
ENSG00000131378	-0.68392
ENSG00000197329	-0.68515
ENSG00000111665	-0.68515
ENSG00000152137	-0.68536
ENSG00000060718	-0.68908
ENSG00000196735	-0.68929
ENSG00000168329	-0.69001
ENSG00000087245	-0.69059
ENSG00000141469	-0.69092
ENSG00000143942	-0.69155
ENSG00000074935	-0.69362
ENSG00000187837	-0.69469
ENSG00000019582	-0.69483
ENSG00000154146	-0.69544
ENSG00000180596	-0.69729
ENSG00000137285	-0.69762
ENSG00000135318	-0.69921
ENSG00000163545	-0.69982
ENSG00000171401	-0.70008
ENSG00000106537	-0.70019
ENSG00000180354	-0.70212
ENSG00000140284	-0.70367
ENSG00000165617	-0.70418
ENSG00000197919	-0.70484
ENSG00000100097	-0.70552
ENSG00000175899	-0.70592
ENSG00000106004	-0.70609
ENSG00000065328	-0.70618
ENSG00000171208	-0.70856
ENSG00000123560	-0.7088
ENSG00000065833	-0.70894
ENSG00000166396	-0.71007
ENSG00000140105	-0.7105
ENSG00000026103	-0.71083
ENSG00000108055	-0.71094
ENSG00000198535	-0.71111
ENSG00000132359	-0.71302
ENSG00000240583	-0.71362
ENSG00000076382	-0.71428
ENSG00000003436	-0.7153
ENSG00000152952	-0.71541
ENSG00000115163	-0.71641
ENSG00000107165	-0.71686
ENSG00000104213	-0.71726
ENSG00000102879	-0.71798
ENSG00000164647	-0.71878
ENSG00000139329	-0.71983
ENSG00000129538	-0.72047
ENSG00000128606	-0.72104
ENSG00000013441	-0.72106
ENSG00000093009	-0.72287
ENSG00000117586	-0.72368
ENSG00000125144	-0.72402
ENSG00000168394	-0.72521
ENSG00000188404	-0.72623
ENSG00000184613	-0.72657
ENSG00000179344	-0.72721
ENSG00000112299	-0.72795
ENSG00000120539	-0.72831
ENSG00000164920	-0.72862
ENSG00000121621	-0.72953
ENSG00000087842	-0.73159
ENSG00000184500	-0.732
ENSG00000186529	-0.73207
ENSG00000146070	-0.73226
ENSG00000168461	-0.73257
ENSG00000132170	-0.73279
ENSG00000126947	-0.73348
ENSG00000152409	-0.73351
ENSG00000124253	-0.73497
ENSG00000176153	-0.73588
ENSG00000164649	-0.73711
ENSG00000139508	-0.74
ENSG00000112137	-0.7413
ENSG00000074706	-0.74318
ENSG00000164683	-0.7433
ENSG00000136492	-0.74352
ENSG00000178726	-0.74357
ENSG00000184330	-0.74422
ENSG00000165140	-0.74441
ENSG00000168497	-0.74451
ENSG00000103375	-0.74693
ENSG00000164442	-0.7504
ENSG00000153714	-0.75091
ENSG00000277443	-0.75127
ENSG00000108679	-0.75134
ENSG00000164251	-0.75297
ENSG00000151623	-0.75321
ENSG00000174749	-0.75453
ENSG00000108551	-0.75516
ENSG00000105928	-0.75616
ENSG00000095585	-0.75753
ENSG00000106278	-0.75967
ENSG00000136161	-0.76028
ENSG00000183722	-0.7607
ENSG00000261150	-0.76236
ENSG00000183688	-0.76241
ENSG00000158473	-0.76253
ENSG00000137563	-0.76361
ENSG00000165023	-0.76371
ENSG00000215845	-0.7641
ENSG00000133816	-0.7641
ENSG00000179163	-0.76474
ENSG00000003096	-0.76596
ENSG00000170477	-0.76614
ENSG00000140682	-0.76614
ENSG00000057704	-0.76758
ENSG00000100504	-0.7694
ENSG00000176170	-0.76985
ENSG00000116729	-0.77103
ENSG00000126803	-0.77154
ENSG00000171659	-0.77398
ENSG00000169855	-0.77559
ENSG00000115415	-0.77668
ENSG00000153233	-0.77707
ENSG00000013588	-0.7772
ENSG00000169184	-0.77729
ENSG00000108179	-0.77737
ENSG00000169252	-0.7795
ENSG00000116663	-0.77952
ENSG00000069535	-0.77999
ENSG00000182916	-0.78056
ENSG00000178075	-0.78069
ENSG00000107562	-0.78404
ENSG00000136688	-0.78409
ENSG00000163840	-0.78463
ENSG00000118640	-0.78481
ENSG00000261371	-0.78523
ENSG00000185950	-0.78565
ENSG00000164104	-0.78607
ENSG00000175265	-0.78635
ENSG00000169242	-0.78647
ENSG00000181019	-0.78652
ENSG00000078098	-0.78722
ENSG00000181631	-0.78737
ENSG00000145864	-0.78831
ENSG00000197614	-0.78934
ENSG00000213186	-0.78934
ENSG00000164211	-0.78956
ENSG00000175352	-0.78991
ENSG00000139278	-0.78994
ENSG00000115290	-0.79021
ENSG00000197496	-0.79106
ENSG00000242574	-0.79128
ENSG00000198692	-0.79163
ENSG00000019186	-0.79243
ENSG00000086289	-0.79258
ENSG00000111801	-0.79343
ENSG00000156284	-0.79383
ENSG00000244020	-0.79556
ENSG00000117519	-0.79621
ENSG00000171940	-0.79779
ENSG00000197405	-0.79824
ENSG00000103888	-0.79902
ENSG00000171793	-0.79917
ENSG00000150893	-0.80007
ENSG00000172023	-0.80103
ENSG00000179542	-0.80115
ENSG00000160179	-0.80191
ENSG00000118898	-0.80627
ENSG00000171056	-0.80629
ENSG00000146918	-0.8069
ENSG00000064886	-0.80705
ENSG00000086696	-0.80836
ENSG00000156587	-0.80856
ENSG00000100234	-0.80874
ENSG00000123609	-0.80879
ENSG00000113302	-0.80925
ENSG00000140279	-0.81041
ENSG00000157514	-0.81051
ENSG00000106565	-0.81107
ENSG00000250722	-0.81112
ENSG00000168062	-0.81198
ENSG00000115604	-0.81284
ENSG00000111885	-0.81538
ENSG00000145681	-0.81586
ENSG00000184661	-0.81644
ENSG00000107485	-0.81698
ENSG00000151726	-0.81718
ENSG00000134193	-0.81764
ENSG00000136404	-0.81812
ENSG00000108244	-0.81838
ENSG00000163347	-0.81901
ENSG00000164136	-0.81934
ENSG00000155307	-0.82273
ENSG00000176014	-0.82347
ENSG00000198944	-0.82414
ENSG00000222009	-0.8247
ENSG00000105894	-0.82536
ENSG00000097046	-0.82559
ENSG00000189221	-0.82695
ENSG00000075218	-0.82703
ENSG00000111012	-0.82731
ENSG00000075223	-0.82838
ENSG00000165490	-0.82933
ENSG00000121690	-0.83054
ENSG00000278828	-0.8319
ENSG00000162444	-0.83228
ENSG00000188290	-0.83287
ENSG00000169439	-0.8331
ENSG00000165030	-0.83321
ENSG00000101347	-0.83326
ENSG00000198417	-0.83359
ENSG00000136205	-0.83573
ENSG00000166851	-0.83697
ENSG00000162595	-0.83735
ENSG00000157502	-0.8389
ENSG00000185585	-0.83898
ENSG00000169607	-0.83985
ENSG00000104450	-0.84058
ENSG00000109674	-0.84334
ENSG00000186462	-0.84435
ENSG00000144063	-0.84505
ENSG00000109084	-0.84521
ENSG00000153253	-0.84547
ENSG00000275395	-0.84718
ENSG00000150782	-0.84853
ENSG00000157005	-0.84856
ENSG00000139112	-0.85345
ENSG00000165312	-0.8558
ENSG00000129521	-0.85582
ENSG00000180543	-0.85629
ENSG00000011201	-0.85684
ENSG00000170425	-0.85765
ENSG00000010438	-0.85831
ENSG00000066279	-0.85993
ENSG00000162545	-0.86048
ENSG00000258227	-0.86105
ENSG00000119147	-0.86134
ENSG00000173930	-0.86153
ENSG00000111331	-0.86189
ENSG00000115641	-0.8621
ENSG00000008394	-0.86284
ENSG00000163630	-0.86297
ENSG00000117479	-0.86433
ENSG00000074410	-0.8646
ENSG00000163171	-0.86552
ENSG00000050344	-0.86557
ENSG00000125355	-0.86612
ENSG00000091972	-0.86978
ENSG00000156802	-0.86986
ENSG00000130635	-0.8702
ENSG00000006606	-0.87039
ENSG00000134690	-0.87049
ENSG00000165449	-0.87123
ENSG00000072657	-0.87173
ENSG00000154153	-0.87181
ENSG00000143369	-0.87239
ENSG00000117009	-0.87263
ENSG00000115386	-0.87282
ENSG00000162772	-0.87353
ENSG00000111799	-0.87411
ENSG00000166033	-0.87784
ENSG00000253368	-0.87906
ENSG00000107295	-0.8792
ENSG00000151725	-0.87997
ENSG00000153162	-0.88063
ENSG00000154027	-0.88076
ENSG00000154277	-0.88106
ENSG00000123405	-0.88114
ENSG00000172594	-0.88188
ENSG00000243716	-0.88321
ENSG00000143341	-0.88545
ENSG00000185499	-0.88798
ENSG00000198796	-0.88811
ENSG00000155760	-0.88862
ENSG00000134470	-0.88945
ENSG00000059378	-0.88956
ENSG00000121236	-0.88998
ENSG00000167642	-0.89081
ENSG00000089199	-0.8917
ENSG00000175567	-0.89199
ENSG00000115963	-0.89231
ENSG00000134363	-0.89247
ENSG00000164109	-0.89387
ENSG00000100368	-0.89467
ENSG00000050165	-0.89472
ENSG00000163131	-0.89617
ENSG00000156298	-0.89666
ENSG00000101265	-0.89706
ENSG00000099194	-0.89719
ENSG00000119950	-0.89988
ENSG00000182253	-0.90007
ENSG00000185432	-0.90083
ENSG00000152778	-0.90309
ENSG00000177432	-0.9042
ENSG00000137310	-0.90617
ENSG00000162654	-0.9062
ENSG00000166250	-0.90658
ENSG00000204516	-0.90703
ENSG00000185100	-0.90714
ENSG00000092621	-0.90801
ENSG00000026508	-0.90855
ENSG00000095794	-0.90901
ENSG00000103490	-0.90972
ENSG00000168268	-0.91039
ENSG00000100079	-0.91115
ENSG00000162366	-0.91496
ENSG00000134873	-0.91585
ENSG00000110852	-0.91697
ENSG00000134871	-0.91904
ENSG00000196950	-0.9197
ENSG00000158825	-0.91978
ENSG00000112312	-0.92071
ENSG00000119138	-0.92087
ENSG00000143153	-0.92101
ENSG00000116133	-0.92106
ENSG00000152078	-0.92125
ENSG00000203805	-0.92158
ENSG00000161921	-0.92221
ENSG00000138119	-0.92237
ENSG00000132965	-0.92248
ENSG00000117461	-0.92289
ENSG00000143387	-0.92341
ENSG00000198829	-0.92371
ENSG00000101680	-0.92388
ENSG00000167641	-0.92511
ENSG00000124145	-0.92544
ENSG00000228716	-0.92717
ENSG00000110031	-0.93011
ENSG00000105011	-0.93107
ENSG00000176845	-0.93115
ENSG00000169946	-0.93228
ENSG00000152154	-0.93258
ENSG00000111907	-0.93288
ENSG00000138035	-0.9331
ENSG00000152229	-0.93357
ENSG00000146374	-0.93722
ENSG00000162817	-0.94045
ENSG00000167767	-0.94103
ENSG00000078018	-0.94164
ENSG00000093072	-0.94173
ENSG00000164825	-0.94211
ENSG00000197757	-0.94539
ENSG00000111341	-0.94611
ENSG00000184368	-0.94747
ENSG00000123473	-0.94789
ENSG00000107159	-0.949
ENSG00000138496	-0.94928
ENSG00000136982	-0.94992
ENSG00000167996	-0.94992
ENSG00000016602	-0.95001
ENSG00000052802	-0.9509
ENSG00000039068	-0.95215
ENSG00000214357	-0.95227
ENSG00000165071	-0.95241
ENSG00000087494	-0.95266
ENSG00000170835	-0.95433
ENSG00000124140	-0.95646
ENSG00000168386	-0.95649
ENSG00000099139	-0.9566
ENSG00000146678	-0.95699
ENSG00000119514	-0.95722
ENSG00000164056	-0.95769
ENSG00000115267	-0.95862
ENSG00000146376	-0.95921
ENSG00000070540	-0.96232
ENSG00000163659	-0.9628
ENSG00000172137	-0.96432
ENSG00000186767	-0.96652
ENSG00000188613	-0.96697
ENSG00000198932	-0.96714
ENSG00000129757	-0.96798
ENSG00000105664	-0.96821
ENSG00000167766	-0.9686
ENSG00000071967	-0.96892
ENSG00000070961	-0.96965
ENSG00000025039	-0.97005
ENSG00000163644	-0.97016
ENSG00000134222	-0.97067
ENSG00000101384	-0.97081
ENSG00000130208	-0.97089
ENSG00000156265	-0.97118
ENSG00000204264	-0.97149
ENSG00000119927	-0.97152
ENSG00000144136	-0.97177
ENSG00000169508	-0.97214
ENSG00000163683	-0.97256
ENSG00000110195	-0.97273
ENSG00000100867	-0.97395
ENSG00000006634	-0.97423
ENSG00000139926	-0.97443
ENSG00000091428	-0.97472
ENSG00000175130	-0.97613
ENSG00000139737	-0.97747
ENSG00000119969	-0.97772
ENSG00000136158	-0.97815
ENSG00000125266	-0.97846
ENSG00000168496	-0.97866
ENSG00000128340	-0.9794
ENSG00000184992	-0.98199
ENSG00000137752	-0.98279
ENSG00000112972	-0.98345
ENSG00000150938	-0.98439
ENSG00000168679	-0.98527
ENSG00000187951	-0.98542
ENSG00000173221	-0.98544
ENSG00000130066	-0.98562
ENSG00000136160	-0.98573
ENSG00000138378	-0.98593
ENSG00000242265	-0.98833
ENSG00000256235	-0.99085
ENSG00000154511	-0.99143
ENSG00000136541	-0.99186
ENSG00000168993	-0.99212
ENSG00000151136	-0.99252
ENSG00000180340	-0.99392
ENSG00000127824	-0.9941
ENSG00000173559	-0.99519
ENSG00000092964	-0.99559
ENSG00000137642	-0.99562
ENSG00000189334	-0.99674
ENSG00000111275	-0.99674
ENSG00000105971	-0.99804
ENSG00000183662	-0.9985
ENSG00000103811	-0.99873
ENSG00000143110	-0.9989
ENSG00000088992	-0.99974
ENSG00000075618	-1.00043
ENSG00000171346	-1.00055
ENSG00000134460	-1.00217
ENSG00000154640	-1.00283
ENSG00000101445	-1.00358
ENSG00000169679	-1.0037
ENSG00000158373	-1.00384
ENSG00000163435	-1.00413
ENSG00000163947	-1.00685
ENSG00000129116	-1.00697
ENSG00000180530	-1.00732
ENSG00000074181	-1.00752
ENSG00000065809	-1.00833
ENSG00000162433	-1.00955
ENSG00000158406	-1.00964
ENSG00000103485	-1.01051
ENSG00000186832	-1.01112
ENSG00000108688	-1.01255
ENSG00000183019	-1.01261
ENSG00000132357	-1.01441
ENSG00000143320	-1.01599
ENSG00000146409	-1.01686
ENSG00000166508	-1.0175
ENSG00000174738	-1.01768
ENSG00000102409	-1.01794
ENSG00000235162	-1.01894
ENSG00000188257	-1.01981
ENSG00000198056	-1.01999
ENSG00000076641	-1.02002
ENSG00000135750	-1.0204
ENSG00000075131	-1.02142
ENSG00000104435	-1.02192
ENSG00000141526	-1.02236
ENSG00000138413	-1.02289
ENSG00000150995	-1.02342
ENSG00000132429	-1.02348
ENSG00000174343	-1.02368
ENSG00000103569	-1.02421
ENSG00000072694	-1.02488
ENSG00000147027	-1.02512
ENSG00000104783	-1.02521
ENSG00000137441	-1.02729
ENSG00000118985	-1.02794
ENSG00000127955	-1.02865
ENSG00000103187	-1.02956
ENSG00000140525	-1.03006
ENSG00000163393	-1.03118
ENSG00000157557	-1.03195
ENSG00000163132	-1.03203
ENSG00000276644	-1.03227
ENSG00000132646	-1.03357
ENSG00000115271	-1.03457
ENSG00000135378	-1.03534
ENSG00000137767	-1.03546
ENSG00000172794	-1.03593
ENSG00000198964	-1.03626
ENSG00000184867	-1.03673
ENSG00000091409	-1.03815
ENSG00000105205	-1.03878
ENSG00000138604	-1.03964
ENSG00000163918	-1.03984
ENSG00000254087	-1.0399
ENSG00000170955	-1.04041
ENSG00000143367	-1.04044
ENSG00000167617	-1.0424
ENSG00000106538	-1.04421
ENSG00000154065	-1.04487
ENSG00000130707	-1.0449
ENSG00000155962	-1.04496
ENSG00000163209	-1.04743
ENSG00000182667	-1.04758
ENSG00000197872	-1.04808
ENSG00000163508	-1.04835
ENSG00000115758	-1.0485
ENSG00000142227	-1.04928
ENSG00000185222	-1.04949
ENSG00000165879	-1.04958
ENSG00000153044	-1.05206
ENSG00000081189	-1.05334
ENSG00000152518	-1.05427
ENSG00000173698	-1.05526
ENSG00000127990	-1.05535
ENSG00000163362	-1.05796
ENSG00000106415	-1.05853
ENSG00000198053	-1.05886
ENSG00000142765	-1.0591
ENSG00000124479	-1.06013
ENSG00000144354	-1.06157
ENSG00000153395	-1.06166
ENSG00000131711	-1.06193
ENSG00000162511	-1.06254
ENSG00000131459	-1.06263
ENSG00000181381	-1.06625
ENSG00000151715	-1.06673
ENSG00000197635	-1.06703
ENSG00000173083	-1.06755
ENSG00000048462	-1.06797
ENSG00000263639	-1.06988
ENSG00000099256	-1.07009
ENSG00000133710	-1.07248
ENSG00000171243	-1.07276
ENSG00000255150	-1.07285
ENSG00000064763	-1.07397
ENSG00000102393	-1.07427
ENSG00000022267	-1.07452
ENSG00000100297	-1.07509
ENSG00000173369	-1.07525
ENSG00000154736	-1.07637
ENSG00000251493	-1.07649
ENSG00000154839	-1.07795
ENSG00000130844	-1.07875
ENSG00000148154	-1.07917
ENSG00000198832	-1.0818
ENSG00000162520	-1.08186
ENSG00000155099	-1.08198
ENSG00000063180	-1.08308
ENSG00000100979	-1.08366
ENSG00000160180	-1.0843
ENSG00000164283	-1.0855
ENSG00000102359	-1.0855
ENSG00000095752	-1.08568
ENSG00000168502	-1.08577
ENSG00000189144	-1.08761
ENSG00000115648	-1.0877
ENSG00000197142	-1.08783
ENSG00000177508	-1.08798
ENSG00000062038	-1.08853
ENSG00000172724	-1.08884
ENSG00000081803	-1.08884
ENSG00000138587	-1.08896
ENSG00000135914	-1.09034
ENSG00000182393	-1.09037
ENSG00000115129	-1.09043
ENSG00000133574	-1.0908
ENSG00000275342	-1.09093
ENSG00000103742	-1.09126
ENSG00000012817	-1.09133
ENSG00000137198	-1.09136
ENSG00000153976	-1.09139
ENSG00000061918	-1.09154
ENSG00000179981	-1.09157
ENSG00000130766	-1.09194
ENSG00000164237	-1.09219
ENSG00000152642	-1.09231
ENSG00000102854	-1.09262
ENSG00000132698	-1.09345
ENSG00000175857	-1.09505
ENSG00000175793	-1.09511
ENSG00000169744	-1.09545
ENSG00000166582	-1.0961
ENSG00000109452	-1.09616
ENSG00000164930	-1.09619
ENSG00000106809	-1.09659
ENSG00000170006	-1.09832
ENSG00000148175	-1.09909
ENSG00000120594	-1.09999
ENSG00000143878	-1.10076
ENSG00000160932	-1.10095
ENSG00000023909	-1.10147
ENSG00000157445	-1.102
ENSG00000105991	-1.102
ENSG00000108602	-1.10355
ENSG00000146859	-1.10401
ENSG00000204936	-1.10423
ENSG00000135476	-1.10467
ENSG00000160588	-1.10563
ENSG00000054793	-1.10591
ENSG00000123500	-1.10631
ENSG00000140519	-1.10659
ENSG00000175928	-1.10662
ENSG00000183036	-1.10672
ENSG00000078596	-1.10709
ENSG00000151692	-1.10752
ENSG00000162747	-1.10852
ENSG00000138356	-1.10858
ENSG00000025423	-1.10886
ENSG00000176697	-1.10886
ENSG00000159189	-1.10892
ENSG00000169896	-1.10917
ENSG00000100473	-1.11054
ENSG00000188293	-1.11057
ENSG00000101000	-1.11101
ENSG00000123136	-1.11163
ENSG00000132854	-1.11179
ENSG00000113810	-1.11338
ENSG00000205208	-1.11366
ENSG00000160307	-1.11388
ENSG00000118971	-1.11419
ENSG00000022355	-1.11463
ENSG00000065911	-1.11478
ENSG00000166750	-1.11478
ENSG00000162616	-1.11491
ENSG00000104889	-1.11525
ENSG00000091127	-1.11532
ENSG00000146733	-1.11544
ENSG00000106546	-1.11888
ENSG00000134215	-1.11926
ENSG00000155465	-1.12058
ENSG00000164694	-1.12334
ENSG00000178966	-1.12369
ENSG00000101336	-1.12394
ENSG00000071575	-1.12419
ENSG00000172159	-1.1251
ENSG00000000460	-1.12535
ENSG00000161281	-1.12542
ENSG00000092969	-1.12595
ENSG00000102471	-1.12605
ENSG00000115165	-1.12649
ENSG00000279576	-1.12794
ENSG00000172216	-1.12809
ENSG00000197299	-1.12967
ENSG00000171223	-1.1298
ENSG00000070526	-1.12999
ENSG00000184905	-1.13087
ENSG00000107249	-1.13097
ENSG00000134343	-1.13201
ENSG00000152217	-1.13214
ENSG00000057657	-1.13327
ENSG00000164400	-1.13331
ENSG00000164045	-1.13346
ENSG00000156011	-1.13394
ENSG00000085840	-1.13616
ENSG00000091490	-1.13628
ENSG00000100162	-1.13632
ENSG00000077585	-1.13638
ENSG00000156414	-1.13771
ENSG00000146476	-1.13854
ENSG00000168404	-1.13971
ENSG00000054598	-1.14038
ENSG00000162745	-1.1407
ENSG00000128656	-1.14191
ENSG00000168003	-1.14242
ENSG00000197442	-1.14267
ENSG00000157193	-1.14315
ENSG00000128284	-1.14318
ENSG00000100889	-1.14382
ENSG00000172031	-1.14474
ENSG00000145246	-1.1458
ENSG00000133561	-1.14685
ENSG00000165379	-1.14698
ENSG00000147003	-1.14778
ENSG00000165588	-1.14848
ENSG00000143819	-1.15037
ENSG00000180353	-1.1504
ENSG00000092201	-1.15063
ENSG00000102575	-1.15098
ENSG00000187094	-1.15117
ENSG00000119866	-1.15162
ENSG00000139354	-1.15168
ENSG00000112029	-1.15248
ENSG00000125810	-1.15338
ENSG00000165507	-1.15573
ENSG00000148700	-1.15721
ENSG00000148459	-1.15733
ENSG00000170961	-1.15779
ENSG00000148677	-1.15833
ENSG00000145649	-1.15853
ENSG00000108924	-1.15856
ENSG00000074590	-1.15859
ENSG00000157107	-1.15952
ENSG00000156508	-1.15962
ENSG00000171428	-1.1601
ENSG00000181617	-1.16065
ENSG00000172551	-1.16098
ENSG00000104432	-1.16152
ENSG00000198729	-1.16194
ENSG00000005020	-1.16262
ENSG00000185947	-1.16298
ENSG00000166130	-1.16366
ENSG00000163376	-1.16543
ENSG00000166979	-1.16582
ENSG00000121691	-1.16602
ENSG00000105784	-1.16621
ENSG00000095303	-1.16683
ENSG00000115363	-1.16786
ENSG00000106976	-1.16796
ENSG00000144331	-1.16828
ENSG00000100600	-1.17049
ENSG00000163121	-1.17056
ENSG00000137462	-1.17166
ENSG00000059728	-1.17199
ENSG00000112186	-1.17241
ENSG00000129151	-1.17296
ENSG00000101057	-1.17332
ENSG00000134775	-1.17338
ENSG00000172086	-1.17348
ENSG00000141574	-1.17371
ENSG00000072858	-1.17488
ENSG00000124766	-1.17504
ENSG00000214274	-1.17553
ENSG00000168306	-1.17606
ENSG00000183508	-1.17671
ENSG00000171860	-1.17831
ENSG00000128016	-1.17844
ENSG00000164342	-1.17955
ENSG00000061656	-1.17981
ENSG00000132639	-1.18023
ENSG00000170231	-1.18059
ENSG00000029153	-1.18115
ENSG00000123636	-1.18171
ENSG00000182568	-1.18207
ENSG00000140030	-1.1821
ENSG00000174442	-1.1837
ENSG00000119865	-1.184
ENSG00000164463	-1.18485
ENSG00000129493	-1.18541
ENSG00000077713	-1.18567
ENSG00000122884	-1.18597
ENSG00000083454	-1.18613
ENSG00000166482	-1.18659
ENSG00000076554	-1.18744
ENSG00000118113	-1.18774
ENSG00000140600	-1.18797
ENSG00000184005	-1.1884
ENSG00000154265	-1.19017
ENSG00000122378	-1.19077
ENSG00000145147	-1.19129
ENSG00000163751	-1.19314
ENSG00000077063	-1.19572
ENSG00000184221	-1.19595
ENSG00000116574	-1.19621
ENSG00000110092	-1.19674
ENSG00000130821	-1.19681
ENSG00000171724	-1.19704
ENSG00000002726	-1.19737
ENSG00000158402	-1.1975
ENSG00000114315	-1.19767
ENSG00000004799	-1.19813
ENSG00000164330	-1.19929
ENSG00000125430	-1.19952
ENSG00000089356	-1.20025
ENSG00000111261	-1.20138
ENSG00000134138	-1.20148
ENSG00000162636	-1.20164
ENSG00000151693	-1.20168
ENSG00000109861	-1.20247
ENSG00000108511	-1.20264
ENSG00000021355	-1.2027
ENSG00000136167	-1.20277
ENSG00000206538	-1.20297
ENSG00000196975	-1.203
ENSG00000142494	-1.20413
ENSG00000050405	-1.20427
ENSG00000102554	-1.20473
ENSG00000140092	-1.20576
ENSG00000054277	-1.20616
ENSG00000164951	-1.20646
ENSG00000171246	-1.20646
ENSG00000163624	-1.20706
ENSG00000067798	-1.20786
ENSG00000078053	-1.20789
ENSG00000144452	-1.20796
ENSG00000129195	-1.20893
ENSG00000196227	-1.20926
ENSG00000175643	-1.2098
ENSG00000091136	-1.20983
ENSG00000133639	-1.2105
ENSG00000221963	-1.21066
ENSG00000120756	-1.2107
ENSG00000198682	-1.21096
ENSG00000169047	-1.21207
ENSG00000163378	-1.2123
ENSG00000101160	-1.2124
ENSG00000197409	-1.21287
ENSG00000100362	-1.2129
ENSG00000100290	-1.2135
ENSG00000138131	-1.21451
ENSG00000165480	-1.21457
ENSG00000155659	-1.21464
ENSG00000067606	-1.21635
ENSG00000060140	-1.21709
ENSG00000143507	-1.21766
ENSG00000006459	-1.21776
ENSG00000181274	-1.2182
ENSG00000189056	-1.2189
ENSG00000176387	-1.21893
ENSG00000256043	-1.21934
ENSG00000162618	-1.2194
ENSG00000169469	-1.21981
ENSG00000039560	-1.22038
ENSG00000137440	-1.22048
ENSG00000119125	-1.22112
ENSG00000078399	-1.2225
ENSG00000010810	-1.2228
ENSG00000178445	-1.2231
ENSG00000198624	-1.22455
ENSG00000221852	-1.22492
ENSG00000108176	-1.22492
ENSG00000145423	-1.22543
ENSG00000115525	-1.22573
ENSG00000197275	-1.22577
ENSG00000182013	-1.2261
ENSG00000165424	-1.22627
ENSG00000143333	-1.22644
ENSG00000134709	-1.22665
ENSG00000111276	-1.228
ENSG00000120437	-1.23006
ENSG00000106211	-1.23026
ENSG00000143344	-1.23053
ENSG00000186522	-1.23094
ENSG00000087495	-1.23128
ENSG00000103316	-1.23348
ENSG00000042493	-1.23362
ENSG00000101665	-1.23399
ENSG00000164292	-1.23467
ENSG00000204381	-1.23555
ENSG00000015568	-1.23647
ENSG00000147394	-1.23695
ENSG00000198513	-1.23827
ENSG00000188959	-1.24008
ENSG00000182752	-1.24018
ENSG00000174607	-1.24117
ENSG00000104490	-1.24151
ENSG00000136783	-1.24192
ENSG00000170522	-1.24195
ENSG00000165996	-1.24253
ENSG00000187164	-1.24328
ENSG00000171557	-1.24339
ENSG00000165501	-1.24366
ENSG00000227507	-1.24397
ENSG00000150907	-1.2441
ENSG00000138685	-1.24564
ENSG00000121931	-1.24592
ENSG00000010292	-1.24749
ENSG00000157693	-1.25092
ENSG00000111700	-1.25329
ENSG00000204634	-1.25377
ENSG00000173848	-1.25456
ENSG00000140280	-1.25646
ENSG00000189050	-1.25667
ENSG00000112796	-1.2568
ENSG00000167513	-1.25718
ENSG00000081913	-1.25791
ENSG00000142731	-1.25791
ENSG00000101311	-1.25811
ENSG00000278535	-1.25856
ENSG00000182985	-1.26147
ENSG00000113657	-1.2616
ENSG00000180537	-1.26212
ENSG00000173281	-1.26309
ENSG00000282608	-1.26372
ENSG00000170542	-1.26375
ENSG00000095002	-1.26378
ENSG00000167281	-1.26406
ENSG00000162639	-1.26656
ENSG00000150593	-1.26687
ENSG00000149090	-1.26715
ENSG00000160211	-1.26743
ENSG00000179241	-1.26927
ENSG00000179144	-1.26951
ENSG00000136854	-1.27052
ENSG00000151491	-1.27122
ENSG00000021300	-1.27198
ENSG00000150630	-1.27285
ENSG00000121933	-1.2746
ENSG00000171033	-1.27502
ENSG00000196839	-1.2754
ENSG00000165025	-1.27547
ENSG00000104205	-1.27617
ENSG00000149485	-1.27649
ENSG00000182957	-1.27746
ENSG00000139832	-1.27778
ENSG00000130755	-1.27813
ENSG00000135821	-1.27841
ENSG00000091986	-1.27872
ENSG00000164116	-1.27876
ENSG00000085276	-1.27893
ENSG00000112394	-1.27956
ENSG00000133119	-1.27998
ENSG00000171604	-1.28026
ENSG00000119326	-1.28163
ENSG00000005059	-1.28318
ENSG00000198814	-1.28483
ENSG00000174564	-1.285
ENSG00000067066	-1.2856
ENSG00000186472	-1.2862
ENSG00000131724	-1.28644
ENSG00000163762	-1.28659
ENSG00000103647	-1.28736
ENSG00000180964	-1.28814
ENSG00000165973	-1.28817
ENSG00000179431	-1.28866
ENSG00000120278	-1.28884
ENSG00000179674	-1.28898
ENSG00000167261	-1.28909
ENSG00000115232	-1.2894
ENSG00000241794	-1.2899
ENSG00000205426	-1.29011
ENSG00000162078	-1.2906
ENSG00000113916	-1.29117
ENSG00000102935	-1.29142
ENSG00000176532	-1.29184
ENSG00000196116	-1.29251
ENSG00000118946	-1.29286
ENSG00000078804	-1.29293
ENSG00000146232	-1.29311
ENSG00000110079	-1.29428
ENSG00000166592	-1.29446
ENSG00000187908	-1.29477
ENSG00000182809	-1.29492
ENSG00000109814	-1.29506
ENSG00000115594	-1.29527
ENSG00000136999	-1.29527
ENSG00000145358	-1.29534
ENSG00000151025	-1.29594
ENSG00000116962	-1.29828
ENSG00000198795	-1.29846
ENSG00000102287	-1.29878
ENSG00000166002	-1.29885
ENSG00000136379	-1.29963
ENSG00000104537	-1.30009
ENSG00000197061	-1.30041
ENSG00000185480	-1.30248
ENSG00000178904	-1.30262
ENSG00000196787	-1.30276
ENSG00000123240	-1.30294
ENSG00000055163	-1.3034
ENSG00000160188	-1.3039
ENSG00000078237	-1.30433
ENSG00000173114	-1.30557
ENSG00000186918	-1.30557
ENSG00000173404	-1.30622
ENSG00000115902	-1.30679
ENSG00000260916	-1.30689
ENSG00000134240	-1.30825
ENSG00000169385	-1.30843
ENSG00000100285	-1.30861
ENSG00000172716	-1.30861
ENSG00000102908	-1.30879
ENSG00000145777	-1.30904
ENSG00000135744	-1.30957
ENSG00000152894	-1.30986
ENSG00000018625	-1.30986
ENSG00000168389	-1.31004
ENSG00000116016	-1.31007
ENSG00000154096	-1.31058
ENSG00000166394	-1.31079
ENSG00000158869	-1.31154
ENSG00000173801	-1.31161
ENSG00000169035	-1.31294
ENSG00000114374	-1.3138
ENSG00000221955	-1.31394
ENSG00000165685	-1.3143
ENSG00000115884	-1.3147
ENSG00000136531	-1.31538
ENSG00000134070	-1.31628
ENSG00000184557	-1.31638
ENSG00000011600	-1.31696
ENSG00000103175	-1.31721
ENSG00000173705	-1.31761
ENSG00000153071	-1.31764
ENSG00000164746	-1.31807
ENSG00000151617	-1.31836
ENSG00000170561	-1.31836
ENSG00000161055	-1.31858
ENSG00000186470	-1.31944
ENSG00000155304	-1.31984
ENSG00000178776	-1.32081
ENSG00000111252	-1.32106
ENSG00000185633	-1.3215
ENSG00000135899	-1.32232
ENSG00000203880	-1.32297
ENSG00000145725	-1.32341
ENSG00000198826	-1.32467
ENSG00000092820	-1.32478
ENSG00000083720	-1.325
ENSG00000164830	-1.32518
ENSG00000125378	-1.32767
ENSG00000177888	-1.3284
ENSG00000277075	-1.3293
ENSG00000136518	-1.33025
ENSG00000185361	-1.33061
ENSG00000109943	-1.33199
ENSG00000186007	-1.33206
ENSG00000138764	-1.33239
ENSG00000181092	-1.33243
ENSG00000100342	-1.33268
ENSG00000144366	-1.33352
ENSG00000138448	-1.33366
ENSG00000100744	-1.33381
ENSG00000131737	-1.33384
ENSG00000117069	-1.3341
ENSG00000067082	-1.33439
ENSG00000134247	-1.33446
ENSG00000118514	-1.33453
ENSG00000112118	-1.33475
ENSG00000176595	-1.33526
ENSG00000198431	-1.33599
ENSG00000174010	-1.33617
ENSG00000085662	-1.33628
ENSG00000155970	-1.33639
ENSG00000137726	-1.33661
ENSG00000166828	-1.33668
ENSG00000100749	-1.3373
ENSG00000105993	-1.3377
ENSG00000145675	-1.33898
ENSG00000113161	-1.34106
ENSG00000130176	-1.3411
ENSG00000110723	-1.34176
ENSG00000046653	-1.34252
ENSG00000166387	-1.34252
ENSG00000198604	-1.34274
ENSG00000148798	-1.34278
ENSG00000188373	-1.34282
ENSG00000163666	-1.34392
ENSG00000010818	-1.34414
ENSG00000170373	-1.3452
ENSG00000109586	-1.34553
ENSG00000145779	-1.34674
ENSG00000104738	-1.34736
ENSG00000130203	-1.3474
ENSG00000102401	-1.34744
ENSG00000174837	-1.34817
ENSG00000035720	-1.34828
ENSG00000111716	-1.3489
ENSG00000150594	-1.34968
ENSG00000215218	-1.35214
ENSG00000135324	-1.35284
ENSG00000157214	-1.35295
ENSG00000139974	-1.35365
ENSG00000137168	-1.35365
ENSG00000178999	-1.35398
ENSG00000110077	-1.35406
ENSG00000028137	-1.35424
ENSG00000257335	-1.35439
ENSG00000103449	-1.35476
ENSG00000086598	-1.35487
ENSG00000155961	-1.3552
ENSG00000134755	-1.35524
ENSG00000120327	-1.35528
ENSG00000115468	-1.35546
ENSG00000177363	-1.35594
ENSG00000184307	-1.35794
ENSG00000144891	-1.35845
ENSG00000122694	-1.35871
ENSG00000198121	-1.35879
ENSG00000198498	-1.35908
ENSG00000180917	-1.35908
ENSG00000130775	-1.35975
ENSG00000162174	-1.36034
ENSG00000119471	-1.36064
ENSG00000151414	-1.36194
ENSG00000178921	-1.36264
ENSG00000106333	-1.36327
ENSG00000173210	-1.36368
ENSG00000172869	-1.3639
ENSG00000106804	-1.36435
ENSG00000116005	-1.36457
ENSG00000165376	-1.36498
ENSG00000243444	-1.36513
ENSG00000068885	-1.36565
ENSG00000102317	-1.36583
ENSG00000167693	-1.36635
ENSG00000182240	-1.36658
ENSG00000120162	-1.36766
ENSG00000077984	-1.36781
ENSG00000183779	-1.3684
ENSG00000136111	-1.36904
ENSG00000196091	-1.36922
ENSG00000089041	-1.36959
ENSG00000116815	-1.36963
ENSG00000104549	-1.36967
ENSG00000136122	-1.36993
ENSG00000004848	-1.37075
ENSG00000197930	-1.37094
ENSG00000128311	-1.37116
ENSG00000275713	-1.37213
ENSG00000151883	-1.37221
ENSG00000188175	-1.37224
ENSG00000150551	-1.37329
ENSG00000134594	-1.37355
ENSG00000134258	-1.37482
ENSG00000129675	-1.37508
ENSG00000108342	-1.37538
ENSG00000137942	-1.3761
ENSG00000016082	-1.37651
ENSG00000170549	-1.37684
ENSG00000243955	-1.37714
ENSG00000131471	-1.37748
ENSG00000076706	-1.37778
ENSG00000184445	-1.37819
ENSG00000116679	-1.37831
ENSG00000153208	-1.37831
ENSG00000257017	-1.37876
ENSG00000160271	-1.37939
ENSG00000134533	-1.38135
ENSG00000263155	-1.38214
ENSG00000133083	-1.3833
ENSG00000136026	-1.38383
ENSG00000164331	-1.38409
ENSG00000166483	-1.38436
ENSG00000164506	-1.38526
ENSG00000002549	-1.38568
ENSG00000064205	-1.38703
ENSG00000197261	-1.38775
ENSG00000165929	-1.38779
ENSG00000198189	-1.38805
ENSG00000166123	-1.3882
ENSG00000012779	-1.38843
ENSG00000171227	-1.38972
ENSG00000155380	-1.39009
ENSG00000128245	-1.39108
ENSG00000119681	-1.39115
ENSG00000151929	-1.39217
ENSG00000158966	-1.39236
ENSG00000164171	-1.39263
ENSG00000169504	-1.39301
ENSG00000101695	-1.39327
ENSG00000118520	-1.39358
ENSG00000131370	-1.39566
ENSG00000180871	-1.39597
ENSG00000048162	-1.3968
ENSG00000131462	-1.39737
ENSG00000144485	-1.39737
ENSG00000171840	-1.39741
ENSG00000172687	-1.39832
ENSG00000104833	-1.39847
ENSG00000100307	-1.39851
ENSG00000153002	-1.39859
ENSG00000117472	-1.39882
ENSG00000070882	-1.39882
ENSG00000104320	-1.39924
ENSG00000145416	-1.39943
ENSG00000143036	-1.40057
ENSG00000138134	-1.40061
ENSG00000114019	-1.40125
ENSG00000168061	-1.40167
ENSG00000253304	-1.40171
ENSG00000148158	-1.40213
ENSG00000178202	-1.40278
ENSG00000049323	-1.40305
ENSG00000178878	-1.40408
ENSG00000168398	-1.40438
ENSG00000186642	-1.40518
ENSG00000245848	-1.40595
ENSG00000119801	-1.40618
ENSG00000129596	-1.40652
ENSG00000048392	-1.40664
ENSG00000198478	-1.40702
ENSG00000158055	-1.40805
ENSG00000170448	-1.40821
ENSG00000120694	-1.4105
ENSG00000141232	-1.41077
ENSG00000129474	-1.41208
ENSG00000174145	-1.41219
ENSG00000113971	-1.41254
ENSG00000139263	-1.41262
ENSG00000136044	-1.41312
ENSG00000164695	-1.41342
ENSG00000011566	-1.41365
ENSG00000169255	-1.41431
ENSG00000107438	-1.41492
ENSG00000182492	-1.415
ENSG00000187840	-1.41515
ENSG00000106483	-1.4155
ENSG00000145247	-1.41558
ENSG00000188379	-1.41561
ENSG00000117143	-1.41581
ENSG00000151881	-1.41604
ENSG00000109466	-1.4165
ENSG00000153814	-1.41731
ENSG00000180660	-1.41773
ENSG00000185338	-1.41858
ENSG00000183780	-1.41916
ENSG00000205420	-1.42117
ENSG00000142875	-1.42136
ENSG00000140297	-1.42179
ENSG00000165195	-1.42213
ENSG00000154642	-1.42295
ENSG00000143498	-1.42306
ENSG00000186871	-1.42341
ENSG00000110324	-1.42353
ENSG00000182400	-1.42523
ENSG00000277161	-1.42523
ENSG00000116157	-1.42535
ENSG00000103021	-1.42589
ENSG00000143248	-1.42632
ENSG00000188846	-1.42666
ENSG00000161249	-1.42674
ENSG00000180440	-1.42744
ENSG00000177707	-1.42744
ENSG00000101224	-1.42767
ENSG00000169474	-1.42973
ENSG00000140876	-1.42985
ENSG00000111452	-1.43028
ENSG00000102218	-1.43051
ENSG00000197579	-1.43086
ENSG00000159147	-1.43125
ENSG00000160712	-1.43133
ENSG00000173372	-1.43144
ENSG00000150625	-1.43203
ENSG00000158234	-1.43214
ENSG00000198721	-1.43288
ENSG00000118402	-1.43304
ENSG00000056558	-1.43312
ENSG00000091651	-1.43319
ENSG00000113594	-1.43347
ENSG00000170899	-1.43366
ENSG00000168785	-1.4344
ENSG00000049449	-1.4346
ENSG00000148468	-1.43534
ENSG00000144228	-1.43557
ENSG00000223609	-1.43643
ENSG00000138193	-1.43678
ENSG00000123131	-1.43768
ENSG00000154359	-1.4378
ENSG00000134548	-1.43803
ENSG00000189180	-1.43858
ENSG00000170017	-1.43866
ENSG00000021826	-1.43882
ENSG00000152240	-1.4403
ENSG00000116991	-1.44116
ENSG00000165868	-1.44195
ENSG00000168079	-1.44277
ENSG00000135625	-1.44293
ENSG00000136869	-1.44297
ENSG00000087301	-1.4436
ENSG00000176971	-1.44371
ENSG00000172331	-1.44481
ENSG00000196188	-1.4454
ENSG00000151090	-1.44552
ENSG00000095596	-1.44572
ENSG00000163331	-1.44587
ENSG00000173706	-1.44631
ENSG00000147883	-1.44646
ENSG00000163083	-1.44646
ENSG00000007944	-1.44666
ENSG00000119669	-1.448
ENSG00000164300	-1.44827
ENSG00000163959	-1.44914
ENSG00000189060	-1.44941
ENSG00000189369	-1.45044
ENSG00000121807	-1.45064
ENSG00000173334	-1.45072
ENSG00000113552	-1.45127
ENSG00000248485	-1.45135
ENSG00000178381	-1.45261
ENSG00000166501	-1.45269
ENSG00000188643	-1.45304
ENSG00000185630	-1.45344
ENSG00000162607	-1.4536
ENSG00000076248	-1.45395
ENSG00000137648	-1.45407
ENSG00000151135	-1.45419
ENSG00000153347	-1.45462
ENSG00000162769	-1.45514
ENSG00000198183	-1.45522
ENSG00000165795	-1.45553
ENSG00000117616	-1.45561
ENSG00000164816	-1.45589
ENSG00000183844	-1.45609
ENSG00000167183	-1.45629
ENSG00000169129	-1.45648
ENSG00000139629	-1.45656
ENSG00000069712	-1.45684
ENSG00000175497	-1.4574
ENSG00000052795	-1.45847
ENSG00000117600	-1.4585
ENSG00000133818	-1.45854
ENSG00000113742	-1.45882
ENSG00000142973	-1.45962
ENSG00000139631	-1.45977
ENSG00000178764	-1.46005
ENSG00000123562	-1.46033
ENSG00000137936	-1.46061
ENSG00000144837	-1.46069
ENSG00000182919	-1.46077
ENSG00000167081	-1.46196
ENSG00000125629	-1.46204
ENSG00000184838	-1.46212
ENSG00000143847	-1.46283
ENSG00000198759	-1.46311
ENSG00000006652	-1.4645
ENSG00000136630	-1.46478
ENSG00000056736	-1.46598
ENSG00000168310	-1.46642
ENSG00000198959	-1.46717
ENSG00000174718	-1.46745
ENSG00000155849	-1.46797
ENSG00000139174	-1.46869
ENSG00000071794	-1.46893
ENSG00000128944	-1.46909
ENSG00000143815	-1.46913
ENSG00000185483	-1.46933
ENSG00000047634	-1.47073
ENSG00000096968	-1.47149
ENSG00000153898	-1.47153
ENSG00000160326	-1.47189
ENSG00000196628	-1.47205
ENSG00000166448	-1.47205
ENSG00000156675	-1.47261
ENSG00000179598	-1.47497
ENSG00000127995	-1.47513
ENSG00000123685	-1.4757
ENSG00000100558	-1.47574
ENSG00000133026	-1.47694
ENSG00000204856	-1.47738
ENSG00000104894	-1.47815
ENSG00000120256	-1.47843
ENSG00000075624	-1.47915
ENSG00000163421	-1.48112
ENSG00000115607	-1.48157
ENSG00000163781	-1.48201
ENSG00000001561	-1.48205
ENSG00000213424	-1.48217
ENSG00000159388	-1.48225
ENSG00000064651	-1.48253
ENSG00000148848	-1.48261
ENSG00000169116	-1.4831
ENSG00000182901	-1.48427
ENSG00000128708	-1.48463
ENSG00000168490	-1.48491
ENSG00000118596	-1.48528
ENSG00000110042	-1.48544
ENSG00000161981	-1.48568
ENSG00000159176	-1.48613
ENSG00000162738	-1.48617
ENSG00000183684	-1.48649
ENSG00000213088	-1.48665
ENSG00000120053	-1.48685
ENSG00000100483	-1.48697
ENSG00000189292	-1.4871
ENSG00000087253	-1.48754
ENSG00000197696	-1.48754
ENSG00000130164	-1.48762
ENSG00000254004	-1.48762
ENSG00000137691	-1.4879
ENSG00000134531	-1.48815
ENSG00000173276	-1.48875
ENSG00000197375	-1.48924
ENSG00000008405	-1.48961
ENSG00000174640	-1.48985
ENSG00000086619	-1.49029
ENSG00000183474	-1.49042
ENSG00000109929	-1.49094
ENSG00000099204	-1.49212
ENSG00000198890	-1.49317
ENSG00000069974	-1.49338
ENSG00000068615	-1.49346
ENSG00000139116	-1.49366
ENSG00000170396	-1.49387
ENSG00000176887	-1.49391
ENSG00000118412	-1.49435
ENSG00000124469	-1.49443
ENSG00000106123	-1.49464
ENSG00000134602	-1.49537
ENSG00000163823	-1.49549
ENSG00000161638	-1.49578
ENSG00000181481	-1.49651
ENSG00000139173	-1.49667
ENSG00000116106	-1.4972
[truncated: 14,646 more rows]

## Sheet: Mouse
Gene-ID	GEP
ENSMUSG00000030105	-3.75283
ENSMUSG00000042428	-4.29223
ENSMUSG00000024335	-3.33017
ENSMUSG00000078899	-2.81583
ENSMUSG00000096054	-3.23705
ENSMUSG00000002983	-1.95842
ENSMUSG00000046532	-2.12142
ENSMUSG00000021179	-3.77458
ENSMUSG00000058979	-5.67374
ENSMUSG00000025479	-1.117
ENSMUSG00000045903	-2.9179
ENSMUSG00000070645	-1.91332
ENSMUSG00000038045	-4.17007
ENSMUSG00000041889	-2.70821
ENSMUSG00000055826	-4.38443
ENSMUSG00000054325	-0.68559
ENSMUSG00000024518	-5.00185
ENSMUSG00000021392	-3.2776
ENSMUSG00000040113	-4.37183
ENSMUSG00000049536	-2.38473
ENSMUSG00000019297	-3.28588
ENSMUSG00000079560	-5.37482
ENSMUSG00000040356	-3.71312
ENSMUSG00000030786	-1.28609
ENSMUSG00000025237	-4.58208
ENSMUSG00000006299	-4.04716
ENSMUSG00000022375	-4.27704
ENSMUSG00000056342	-4.07826
ENSMUSG00000029608	-4.19654
ENSMUSG00000025872	-3.88321
ENSMUSG00000001524	-3.66328
ENSMUSG00000035958	-2.68233
ENSMUSG00000030144	-0.45835
ENSMUSG00000025058	-2.18882
ENSMUSG00000015002	-3.59806
ENSMUSG00000042797	-2.66073
ENSMUSG00000021287	-4.07655
ENSMUSG00000024163	-4.62167
ENSMUSG00000021610	-3.78727
ENSMUSG00000022938	-2.95154
ENSMUSG00000079419	-1.0122
ENSMUSG00000071489	-5.51887
ENSMUSG00000035295	-5.28209
ENSMUSG00000020152	-4.19628
ENSMUSG00000062175	-3.85977
ENSMUSG00000036395	-2.91539
ENSMUSG00000039878	-3.88044
ENSMUSG00000005540	-2.59562
ENSMUSG00000021368	-3.2684
ENSMUSG00000059741	-1.96393
ENSMUSG00000013936	-1.05472
ENSMUSG00000024403	-3.93126
ENSMUSG00000032504	-4.50144
ENSMUSG00000060559	-4.76337
ENSMUSG00000050855	-5.31387
ENSMUSG00000021280	-2.24742
ENSMUSG00000003053	-2.40431
ENSMUSG00000026163	-2.90953
ENSMUSG00000030374	-3.94408
ENSMUSG00000026664	-2.13359
ENSMUSG00000024524	-4.41212
ENSMUSG00000034297	-4.747
ENSMUSG00000036199	-3.91311
ENSMUSG00000060012	-3.65073
ENSMUSG00000033439	-5.63165
ENSMUSG00000030101	-3.08363
ENSMUSG00000032298	-2.95199
ENSMUSG00000020607	-1.83934
ENSMUSG00000047604	-2.68557
ENSMUSG00000041577	-1.22358
ENSMUSG00000022594	-3.13239
ENSMUSG00000046876	-2.90855
ENSMUSG00000003477	-1.14283
ENSMUSG00000024242	-3.12205
ENSMUSG00000000411	-4.29138
ENSMUSG00000051159	-2.14133
ENSMUSG00000030472	-5.02374
ENSMUSG00000021866	-2.43846
ENSMUSG00000038459	-3.32366
ENSMUSG00000024940	-3.06443
ENSMUSG00000030754	-3.69656
ENSMUSG00000052854	-3.50112
ENSMUSG00000029328	-3.46371
ENSMUSG00000078851	-1.90958
ENSMUSG00000042659	-2.46029
ENSMUSG00000031953	-4.30643
ENSMUSG00000079183	-4.98393
ENSMUSG00000039395	-1.33504
ENSMUSG00000074737	-5.69675
ENSMUSG00000079298	-2.54861
ENSMUSG00000062275	-3.66091
ENSMUSG00000050370	-0.34327
ENSMUSG00000062124	-5.08265
ENSMUSG00000027997	-4.4852
ENSMUSG00000033186	-3.2045
ENSMUSG00000020123	-2.59693
ENSMUSG00000034165	-4.37004
ENSMUSG00000067722	-4.80269
ENSMUSG00000034639	-3.98736
ENSMUSG00000030888	-2.89862
ENSMUSG00000027490	-3.25498
ENSMUSG00000000544	-4.32916
ENSMUSG00000003131	-4.49038
ENSMUSG00000032191	-4.2623
ENSMUSG00000027806	-3.20556
ENSMUSG00000062184	-4.52649
ENSMUSG00000038323	-2.72328
ENSMUSG00000025804	-1.39882
ENSMUSG00000023921	-3.79686
ENSMUSG00000060188	-3.18338
ENSMUSG00000048960	-3.5126
ENSMUSG00000052187	-2.35387
ENSMUSG00000021612	-5.26091
ENSMUSG00000030921	-0.99358
ENSMUSG00000001870	-4.75399
ENSMUSG00000031490	-2.86407
ENSMUSG00000030934	-2.08712
ENSMUSG00000004892	-3.44882
ENSMUSG00000034218	-2.46379
ENSMUSG00000074195	-1.80834
ENSMUSG00000048029	-3.98279
ENSMUSG00000021214	-2.22465
ENSMUSG00000073243	-5.50308
ENSMUSG00000062154	-4.79306
ENSMUSG00000020516	-4.54962
ENSMUSG00000097333	-4.44536
ENSMUSG00000028785	-4.29223
ENSMUSG00000046755	-4.66273
ENSMUSG00000009739	-3.43191
ENSMUSG00000033429	-2.47762
ENSMUSG00000031629	-2.79116
ENSMUSG00000049488	-5.09641
ENSMUSG00000025484	-4.26036
ENSMUSG00000021709	-2.77054
ENSMUSG00000046417	-2.54473
ENSMUSG00000037266	-2.83774
ENSMUSG00000022529	-3.64946
ENSMUSG00000023971	-3.85893
ENSMUSG00000032171	-3.09074
ENSMUSG00000029380	0.52079
ENSMUSG00000038518	-3.06818
ENSMUSG00000000359	-4.96173
ENSMUSG00000000766	-5.87663
ENSMUSG00000036854	-1.28944
ENSMUSG00000024793	-3.20889
ENSMUSG00000025978	-3.76749
ENSMUSG00000066720	-4.14637
ENSMUSG00000003273	-3.25939
ENSMUSG00000028821	-4.18259
ENSMUSG00000027947	-3.56286
ENSMUSG00000037251	-2.6918
ENSMUSG00000020705	-5.15329
ENSMUSG00000051890	-3.10073
ENSMUSG00000047799	-5.47971
ENSMUSG00000028343	-4.37542
ENSMUSG00000022551	-3.64729
ENSMUSG00000004609	-2.4873
ENSMUSG00000021850	-3.69862
ENSMUSG00000046856	-3.5788
ENSMUSG00000074870	-5.65326
ENSMUSG00000038384	-3.49557
ENSMUSG00000037344	-4.52616
ENSMUSG00000055421	-3.53199
ENSMUSG00000013353	-5.58519
ENSMUSG00000042302	-2.6346
ENSMUSG00000010435	-4.69563
ENSMUSG00000022811	-4.28462
ENSMUSG00000022560	-3.65581
ENSMUSG00000033416	-3.0768
ENSMUSG00000025616	-4.4369
ENSMUSG00000032860	-3.33876
ENSMUSG00000026036	-4.06927
ENSMUSG00000001021	-2.67577
ENSMUSG00000024847	-3.79827
ENSMUSG00000009210	-4.05625
ENSMUSG00000006464	-3.56901
ENSMUSG00000031536	-3.43721
ENSMUSG00000039114	-1.26583
ENSMUSG00000030606	-5.25925
ENSMUSG00000041845	-3.22648
ENSMUSG00000026102	-3.09123
ENSMUSG00000039473	-4.32453
ENSMUSG00000026004	-3.60349
ENSMUSG00000044217	-2.98931
ENSMUSG00000031465	-4.77675
ENSMUSG00000026315	-3.20929
ENSMUSG00000032998	-5.40019
ENSMUSG00000028879	-4.21491
ENSMUSG00000032134	-3.27439
ENSMUSG00000032547	-4.19839
ENSMUSG00000046295	-3.25319
ENSMUSG00000030264	-4.28912
ENSMUSG00000025135	-5.11979
ENSMUSG00000019883	-2.68529
ENSMUSG00000030691	-4.24059
ENSMUSG00000026715	-3.30429
ENSMUSG00000035258	-1.35938
ENSMUSG00000025939	-4.18758
ENSMUSG00000025877	-2.24448
ENSMUSG00000050276	-5.49525
ENSMUSG00000037784	-4.11904
ENSMUSG00000021687	-2.83002
ENSMUSG00000026944	-4.09739
ENSMUSG00000084897	-2.41273
ENSMUSG00000024381	-3.77379
ENSMUSG00000007891	-2.31108
ENSMUSG00000024900	-2.21699
ENSMUSG00000024789	-2.41012
ENSMUSG00000040254	-2.37139
ENSMUSG00000040018	-3.91615
ENSMUSG00000023991	-3.93965
ENSMUSG00000055239	-4.57759
ENSMUSG00000030314	-5.98576
ENSMUSG00000022194	-3.71066
ENSMUSG00000035191	-4.91833
ENSMUSG00000047953	-3.44442
ENSMUSG00000042225	-3.76965
ENSMUSG00000029832	-4.7823
ENSMUSG00000019969	-3.67724
ENSMUSG00000048696	-2.77379
ENSMUSG00000024426	-4.31531
ENSMUSG00000029671	-4.44945
ENSMUSG00000022435	-4.23705
ENSMUSG00000026039	-1.32402
ENSMUSG00000091898	-0.71168
ENSMUSG00000037822	-3.33453
ENSMUSG00000036275	-4.72356
ENSMUSG00000052075	-4.83568
ENSMUSG00000029578	-4.91877
ENSMUSG00000038524	-4.02327
ENSMUSG00000060332	-5.37602
ENSMUSG00000029817	-4.09394
ENSMUSG00000020105	-3.3309
ENSMUSG00000009470	-3.11154
ENSMUSG00000002396	-3.48875
ENSMUSG00000058258	-0.96184
ENSMUSG00000044534	-4.22216
ENSMUSG00000003752	-3.29421
ENSMUSG00000026208	-3.44599
ENSMUSG00000022221	-1.93203
ENSMUSG00000063646	-2.79807
ENSMUSG00000046034	-3.55385
ENSMUSG00000045236	-4.05986
ENSMUSG00000031980	-2.76729
ENSMUSG00000033420	-3.46865
ENSMUSG00000012705	-2.10843
ENSMUSG00000046748	-2.63424
ENSMUSG00000033831	-2.85559
ENSMUSG00000030847	-2.42942
ENSMUSG00000033096	-3.4302
ENSMUSG00000007029	-2.91072
ENSMUSG00000031173	-2.94786
ENSMUSG00000022946	-3.58415
ENSMUSG00000032936	-3.71463
ENSMUSG00000049882	-2.30893
ENSMUSG00000047710	-4.4257
ENSMUSG00000037957	-5.19284
ENSMUSG00000054342	-2.06812
ENSMUSG00000026849	-3.68761
ENSMUSG00000002661	-2.95825
ENSMUSG00000031861	-4.66639
ENSMUSG00000028756	-1.90741
ENSMUSG00000034667	-3.53533
ENSMUSG00000036918	-4.64711
ENSMUSG00000007837	-3.4155
ENSMUSG00000031802	-2.77814
ENSMUSG00000033849	-3.23936
ENSMUSG00000024097	-2.62327
ENSMUSG00000027194	-3.84208
ENSMUSG00000072754	-3.89561
ENSMUSG00000020271	-4.61246
ENSMUSG00000026109	-3.50079
ENSMUSG00000020170	-3.71862
ENSMUSG00000022089	-3.54557
ENSMUSG00000031295	-3.95523
ENSMUSG00000041202	-2.53049
ENSMUSG00000033871	-2.1196
ENSMUSG00000046792	-5.30472
ENSMUSG00000003848	-3.85267
ENSMUSG00000050423	-1.73365
ENSMUSG00000071253	-2.7668
ENSMUSG00000039611	-2.02585
ENSMUSG00000028940	-5.20769
ENSMUSG00000021086	-5.31158
ENSMUSG00000010047	-3.83013
ENSMUSG00000037536	-3.81868
ENSMUSG00000062960	-2.31869
ENSMUSG00000030495	-2.06963
ENSMUSG00000033953	-4.65036
ENSMUSG00000043895	-2.97279
ENSMUSG00000002897	-2.49216
ENSMUSG00000005357	-3.50161
ENSMUSG00000055895	-4.46785
ENSMUSG00000021112	-3.34505
ENSMUSG00000025586	-1.87641
ENSMUSG00000044361	-4.06588
ENSMUSG00000032750	-3.27341
ENSMUSG00000040711	-2.63487
ENSMUSG00000030753	-3.84809
ENSMUSG00000001380	-3.45387
ENSMUSG00000040225	-4.42322
ENSMUSG00000041961	-4.2425
ENSMUSG00000075227	-3.92665
ENSMUSG00000030364	-2.67549
ENSMUSG00000024669	-1.8725
ENSMUSG00000030199	-3.11166
ENSMUSG00000054901	-5.55571
ENSMUSG00000031379	-2.16631
ENSMUSG00000067081	-5.23243
ENSMUSG00000056938	-3.41673
ENSMUSG00000032932	-3.63433
ENSMUSG00000038539	-1.77029
ENSMUSG00000037993	-4.82296
ENSMUSG00000028640	-3.67724
ENSMUSG00000021702	-2.05571
ENSMUSG00000020793	-4.26757
ENSMUSG00000092225	-4.47201
ENSMUSG00000029545	-3.59388
ENSMUSG00000039096	-3.63111
ENSMUSG00000031523	-2.4649
ENSMUSG00000024213	-3.5951
ENSMUSG00000048376	-1.71952
ENSMUSG00000045877	-5.38504
ENSMUSG00000002111	-2.48415
ENSMUSG00000060181	-3.10755
ENSMUSG00000041594	-3.23718
ENSMUSG00000003380	-2.59475
ENSMUSG00000030731	-4.88854
ENSMUSG00000045761	-5.18863
ENSMUSG00000039239	-2.27083
ENSMUSG00000033963	-4.88513
ENSMUSG00000058579	-1.82174
ENSMUSG00000057855	-3.36112
ENSMUSG00000022304	-3.17723
ENSMUSG00000006542	-1.37008
ENSMUSG00000032047	-3.32496
ENSMUSG00000027692	-3.56405
ENSMUSG00000028703	-5.19232
ENSMUSG00000018821	-2.63935
ENSMUSG00000064145	-4.40568
ENSMUSG00000037816	-3.36855
ENSMUSG00000046408	-3.96827
ENSMUSG00000030030	-3.70012
ENSMUSG00000033740	-3.69413
ENSMUSG00000028463	-2.6827
ENSMUSG00000021363	-4.21063
ENSMUSG00000022722	-2.80521
ENSMUSG00000060691	-2.65526
ENSMUSG00000034645	-5.56525
ENSMUSG00000018168	-4.15688
ENSMUSG00000048878	-3.43878
ENSMUSG00000049755	-4.89625
ENSMUSG00000056370	-4.6975
ENSMUSG00000032523	-3.28673
ENSMUSG00000033854	-3.95949
ENSMUSG00000051728	-4.70538
ENSMUSG00000048155	-6.20663
ENSMUSG00000034574	-2.64007
ENSMUSG00000029486	-4.97438
ENSMUSG00000022911	-3.5508
ENSMUSG00000026883	-3.52467
ENSMUSG00000024052	-3.18876
ENSMUSG00000050304	-4.87747
ENSMUSG00000045394	-1.93932
ENSMUSG00000044375	-4.74352
ENSMUSG00000053158	-3.15586
ENSMUSG00000051136	-5.57759
ENSMUSG00000002679	-4.20663
ENSMUSG00000041301	-4.02915
ENSMUSG00000078794	-5.3202
ENSMUSG00000026443	-4.38926
ENSMUSG00000028860	-3.23229
ENSMUSG00000022228	-2.36684
ENSMUSG00000024233	-4.7412
ENSMUSG00000023495	-3.20636
ENSMUSG00000019715	-5.3499
ENSMUSG00000029885	-4.99171
ENSMUSG00000024725	-3.79987
ENSMUSG00000010476	-2.77162
ENSMUSG00000071078	-3.19034
ENSMUSG00000039710	-3.36275
ENSMUSG00000073293	-5.12734
ENSMUSG00000059434	-3.74797
ENSMUSG00000068115	-2.69797
ENSMUSG00000005102	-3.83177
ENSMUSG00000059256	-1.52011
ENSMUSG00000045725	-5.17293
ENSMUSG00000011256	-2.1805
ENSMUSG00000060469	-2.35986
ENSMUSG00000041984	-0.73504
ENSMUSG00000027318	-3.85998
ENSMUSG00000034120	-2.81878
ENSMUSG00000027435	-2.59649
ENSMUSG00000022471	-2.81249
ENSMUSG00000033122	-5.2061
ENSMUSG00000022558	-5.01485
ENSMUSG00000031207	-2.0706
ENSMUSG00000092118	-2.88566
ENSMUSG00000071176	-4.05337
ENSMUSG00000061527	-3.01112
ENSMUSG00000006423	-3.58398
ENSMUSG00000025724	-4.15047
ENSMUSG00000066704	-3.46705
ENSMUSG00000043633	-4.27035
ENSMUSG00000064036	-4.30272
ENSMUSG00000019899	-2.59868
ENSMUSG00000045573	-1.52616
ENSMUSG00000058216	-2.66401
ENSMUSG00000018868	-3.45387
ENSMUSG00000019822	-3.32597
ENSMUSG00000027187	-2.60112
ENSMUSG00000038708	-3.38851
ENSMUSG00000021476	-4.14127
ENSMUSG00000045302	-4.08927
ENSMUSG00000045267	-5.64097
ENSMUSG00000037390	-3.46913
ENSMUSG00000027746	-5.702
ENSMUSG00000029860	-2.37909
ENSMUSG00000078451	-3.03682
ENSMUSG00000047150	-4.27146
ENSMUSG00000042401	-3.83259
ENSMUSG00000030763	-3.87959
ENSMUSG00000040570	-2.56269
ENSMUSG00000024059	-3.58693
ENSMUSG00000021767	-5.30016
ENSMUSG00000028932	-3.77438
ENSMUSG00000023272	-1.73116
ENSMUSG00000031987	-3.67319
ENSMUSG00000022053	-3.10843
ENSMUSG00000001416	-3.44411
ENSMUSG00000024293	-3.71501
ENSMUSG00000001095	-2.9568
ENSMUSG00000036430	-4.62202
ENSMUSG00000027656	-2.43862
ENSMUSG00000070003	-3.76435
ENSMUSG00000020471	-1.91806
ENSMUSG00000061702	-4.88555
ENSMUSG00000064039	-4.74159
ENSMUSG00000033033	-3.00636
ENSMUSG00000022496	-4.10706
ENSMUSG00000004364	-3.64638
ENSMUSG00000025212	-3.1728
ENSMUSG00000046180	-3.48795
ENSMUSG00000060121	-3.05038
ENSMUSG00000031970	-2.91681
ENSMUSG00000090946	-2.82317
ENSMUSG00000031163	-4.33148
ENSMUSG00000067879	-3.95076
ENSMUSG00000028397	-3.82072
ENSMUSG00000026361	-5.03457
ENSMUSG00000007589	-2.91256
ENSMUSG00000063260	-3.84892
ENSMUSG00000062585	-4.73774
ENSMUSG00000020096	-4.10532
ENSMUSG00000003662	-3.8043
ENSMUSG00000063275	-2.15605
ENSMUSG00000021643	-4.76415
ENSMUSG00000015013	-3.35934
ENSMUSG00000073802	-2.64946
ENSMUSG00000019564	-4.68446
ENSMUSG00000032783	-3.84726
ENSMUSG00000025407	-3.53617
ENSMUSG00000038791	-3.24113
ENSMUSG00000026618	-3.51523
ENSMUSG00000047822	-1.87917
ENSMUSG00000050608	-4.56969
ENSMUSG00000028223	-2.78568
ENSMUSG00000026736	-5.43972
ENSMUSG00000033730	-5.03505
ENSMUSG00000030804	-2.54296
ENSMUSG00000075470	-3.53717
ENSMUSG00000069208	-4.06347
ENSMUSG00000031682	-4.94697
ENSMUSG00000029061	-3.1754
ENSMUSG00000062373	-3.02656
ENSMUSG00000036646	-3.70106
ENSMUSG00000031157	-4.11879
ENSMUSG00000029446	-2.14191
ENSMUSG00000079445	-3.56115
ENSMUSG00000041215	-4.09493
ENSMUSG00000041548	-2.40798
ENSMUSG00000032436	-2.56713
ENSMUSG00000001998	-4.25732
ENSMUSG00000020953	-1.87393
ENSMUSG00000042684	-1.28139
ENSMUSG00000034906	-1.75331
ENSMUSG00000038205	-3.11216
ENSMUSG00000035370	-4.38443
ENSMUSG00000083695	-4.66273
ENSMUSG00000034209	-2.97358
ENSMUSG00000027133	-3.39062
ENSMUSG00000050714	-3.25085
ENSMUSG00000037101	-3.56969
ENSMUSG00000021938	-4.2346
ENSMUSG00000009555	-4.51986
ENSMUSG00000054582	-4.41858
ENSMUSG00000033434	-4.96533
ENSMUSG00000031330	-4.98165
ENSMUSG00000025383	-1.39297
ENSMUSG00000042540	-5.11478
ENSMUSG00000021987	-3.45736
ENSMUSG00000045350	-4.73121
ENSMUSG00000068075	-2.48415
ENSMUSG00000032280	-3.44536
ENSMUSG00000040459	-3.71653
ENSMUSG00000020629	-3.02022
ENSMUSG00000060512	-2.9273
ENSMUSG00000074635	-4.30586
ENSMUSG00000067872	-5.02093
ENSMUSG00000007944	-4.47778
ENSMUSG00000094311	-5.76415
ENSMUSG00000003948	-1.87002
ENSMUSG00000057411	-3.41596
ENSMUSG00000026339	-5.79666
ENSMUSG00000024053	-1.42105
ENSMUSG00000020454	-4.36587
ENSMUSG00000036104	-3.97983
ENSMUSG00000030842	-4.19998
ENSMUSG00000054102	-4.92489
ENSMUSG00000028539	-3.26064
ENSMUSG00000016179	-3.67503
ENSMUSG00000032387	-2.44906
ENSMUSG00000051721	-5.0228
ENSMUSG00000020869	-2.32438
ENSMUSG00000073792	-5.03741
ENSMUSG00000048142	-3.74255
ENSMUSG00000057914	-3.63075
ENSMUSG00000022100	-4.61246
ENSMUSG00000020255	-3.35624
ENSMUSG00000023232	-2.75526
ENSMUSG00000025813	-3.21907
ENSMUSG00000020811	-4.77794
ENSMUSG00000042444	-2.31351
ENSMUSG00000019124	-3.75147
ENSMUSG00000000686	-4.09888
ENSMUSG00000078554	-5.01252
ENSMUSG00000000730	-3.38881
ENSMUSG00000036943	-2.17978
ENSMUSG00000031452	-4.55131
ENSMUSG00000052040	-3.11304
ENSMUSG00000060227	-3.15175
ENSMUSG00000038914	-5.54894
ENSMUSG00000037443	-3.49427
ENSMUSG00000024146	-4.2911
ENSMUSG00000026981	-0.49299
ENSMUSG00000005846	-2.9746
ENSMUSG00000038544	-3.93346
ENSMUSG00000019478	-2.79967
ENSMUSG00000030088	-3.28785
ENSMUSG00000062753	-2.82051
ENSMUSG00000006215	-5.86313
ENSMUSG00000021760	-2.60244
ENSMUSG00000066892	-3.21156
ENSMUSG00000070426	-3.88449
ENSMUSG00000040584	-1.35831
ENSMUSG00000035329	-3.02456
ENSMUSG00000032452	-3.23406
ENSMUSG00000035469	-5.21411
ENSMUSG00000021504	-3.99562
ENSMUSG00000098207	-4.22055
ENSMUSG00000026825	-3.42213
ENSMUSG00000026249	-0.86794
ENSMUSG00000042510	-2.32858
ENSMUSG00000008348	-4.0088
ENSMUSG00000027684	-3.87896
ENSMUSG00000033644	-2.97619
ENSMUSG00000024958	-4.44914
ENSMUSG00000075068	-5.17762
ENSMUSG00000045790	-3.11266
ENSMUSG00000043050	-3.79486
ENSMUSG00000031446	-3.93368
ENSMUSG00000048500	-3.72566
ENSMUSG00000039000	-5.44725
ENSMUSG00000024866	-3.22283
ENSMUSG00000028999	-4.92708
ENSMUSG00000025786	-4.31674
ENSMUSG00000024513	-3.4089
ENSMUSG00000003847	-5.13087
ENSMUSG00000037463	-5.45672
ENSMUSG00000010554	-4.90703
ENSMUSG00000022758	-4.87535
ENSMUSG00000100079	-5.24879
ENSMUSG00000030149	-1.84897
ENSMUSG00000020522	-4.85893
ENSMUSG00000032087	-5.8997
ENSMUSG00000031577	-6.02844
ENSMUSG00000073197	-3.35653
ENSMUSG00000049553	-3.90444
ENSMUSG00000037085	-4.94386
ENSMUSG00000042066	-2.01037
ENSMUSG00000028989	-2.43121
ENSMUSG00000006362	-2.59719
ENSMUSG00000063787	-3.36275
ENSMUSG00000027959	-3.18823
ENSMUSG00000024892	-3.36394
ENSMUSG00000066058	-4.77004
ENSMUSG00000032802	-1.60748
ENSMUSG00000025086	-4.28771
ENSMUSG00000060260	-4.72014
ENSMUSG00000032557	-3.27299
ENSMUSG00000026761	-4.28181
ENSMUSG00000024903	-4.51095
ENSMUSG00000100241	-4.76768
ENSMUSG00000032380	-2.05289
ENSMUSG00000036437	-2.67761
ENSMUSG00000019726	-3.52633
ENSMUSG00000002105	-4.50079
ENSMUSG00000000037	-4.09517
ENSMUSG00000029101	-4.13214
ENSMUSG00000022412	-4.5412
ENSMUSG00000050383	-4.64205
ENSMUSG00000003934	-3.0818
ENSMUSG00000014786	-4.94653
ENSMUSG00000071112	-4.11604
ENSMUSG00000033306	-2.965
ENSMUSG00000028518	-2.79136
ENSMUSG00000021032	-5.22378
ENSMUSG00000028970	-1.61803
ENSMUSG00000059448	-5.28602
ENSMUSG00000021576	-4.0037
ENSMUSG00000020405	-3.44411
ENSMUSG00000056605	-3.7616
ENSMUSG00000069631	-5.5632
ENSMUSG00000024963	-4.27313
ENSMUSG00000062115	-4.47009
ENSMUSG00000033444	-3.49151
ENSMUSG00000029431	-5.29732
ENSMUSG00000027200	-4.54523
ENSMUSG00000034931	-3.62344
ENSMUSG00000028370	-2.30643
ENSMUSG00000036764	-1.90131
ENSMUSG00000017195	-4.1213
ENSMUSG00000040026	1.26818
ENSMUSG00000026764	-3.54844
ENSMUSG00000052889	-2.23698
ENSMUSG00000031706	-4.79386
ENSMUSG00000079598	-5.11679
ENSMUSG00000041309	-4.74005
ENSMUSG00000079476	-4.29988
ENSMUSG00000042506	-3.71482
ENSMUSG00000071506	-4.02985
ENSMUSG00000029657	-1.04335
ENSMUSG00000024780	-4.15869
ENSMUSG00000022091	-3.19363
ENSMUSG00000066705	-1.9349
ENSMUSG00000041380	-5.0905
ENSMUSG00000025220	-3.35949
ENSMUSG00000031016	-2.83115
ENSMUSG00000003731	-5.39714
ENSMUSG00000003680	-4.35461
ENSMUSG00000042055	-3.96376
ENSMUSG00000025591	-4.2587
ENSMUSG00000030397	-4.33643
ENSMUSG00000045912	-5.17814
ENSMUSG00000074102	-4.45767
ENSMUSG00000040479	-2.98564
ENSMUSG00000000088	-3.99493
ENSMUSG00000025150	-2.05649
ENSMUSG00000022450	-3.37647
ENSMUSG00000021413	-4.16773
ENSMUSG00000042396	-3.58398
ENSMUSG00000019943	-3.24551
ENSMUSG00000026830	-5.0905
ENSMUSG00000039067	-2.82306
ENSMUSG00000042216	-5.28771
ENSMUSG00000022159	-4.12482
ENSMUSG00000031766	-4.62558
ENSMUSG00000076433	-3.70802
ENSMUSG00000018920	-2.07194
ENSMUSG00000010290	-3.62238
ENSMUSG00000019738	-3.17007
ENSMUSG00000045009	-5.74159
ENSMUSG00000026966	-3.25071
ENSMUSG00000053624	-3.64079
ENSMUSG00000034333	-3.12608
ENSMUSG00000037172	-2.36223
ENSMUSG00000032265	-1.18007
ENSMUSG00000037386	-3.55894
ENSMUSG00000027474	-3.9885
ENSMUSG00000001288	-3.76827
ENSMUSG00000041957	-2.10327
ENSMUSG00000026159	-3.61918
ENSMUSG00000005699	-3.883
ENSMUSG00000048304	-5.46881
ENSMUSG00000020876	-4.67227
ENSMUSG00000019054	-3.2258
ENSMUSG00000038580	-3.79847
ENSMUSG00000025505	-3.8535
ENSMUSG00000031749	-3.52616
ENSMUSG00000017747	-3.79286
ENSMUSG00000040594	-5.2894
ENSMUSG00000002329	-3.86187
ENSMUSG00000030795	-2.16204
ENSMUSG00000020059	-3.18364
ENSMUSG00000006369	-2.5558
ENSMUSG00000071654	-4.04501
ENSMUSG00000058704	-3.31933
ENSMUSG00000026031	-3.50717
ENSMUSG00000095789	-4.16333
ENSMUSG00000039155	-3.67466
ENSMUSG00000001943	-4.56901
ENSMUSG00000036560	-3.77734
ENSMUSG00000042750	-2.05685
ENSMUSG00000030483	-0.56252
ENSMUSG00000026155	-4.2101
ENSMUSG00000000606	-6.55843
ENSMUSG00000011267	-3.66603
ENSMUSG00000035310	-3.39638
ENSMUSG00000058486	-3.96736
ENSMUSG00000051359	-3.32121
ENSMUSG00000025528	-4.40293
ENSMUSG00000010362	-2.90379
ENSMUSG00000044349	-2.79837
ENSMUSG00000078442	-5.35284
ENSMUSG00000020134	-3.43909
ENSMUSG00000018574	-3.27007
ENSMUSG00000001823	-5.26202
ENSMUSG00000025423	-4.12557
ENSMUSG00000062397	-3.55385
ENSMUSG00000034610	-3.26493
ENSMUSG00000029088	-3.9105
ENSMUSG00000031727	-4.6295
ENSMUSG00000040511	-2.42756
ENSMUSG00000003037	-5.13239
ENSMUSG00000042660	-3.80048
ENSMUSG00000040204	-1.13296
ENSMUSG00000042500	-3.02268
ENSMUSG00000031756	-2.309
ENSMUSG00000050973	-3.98599
ENSMUSG00000030386	-4.54894
ENSMUSG00000054252	-3.14089
ENSMUSG00000071089	-4.92314
ENSMUSG00000042558	-4.22837
ENSMUSG00000036721	-3.28054
ENSMUSG00000021228	-1.61954
ENSMUSG00000029554	-5.08412
ENSMUSG00000062604	-3.63326
ENSMUSG00000030835	-3.23909
ENSMUSG00000025511	-2.02198
ENSMUSG00000032640	-2.5216
ENSMUSG00000053641	-2.75789
ENSMUSG00000036278	-1.75511
ENSMUSG00000042423	-3.58139
ENSMUSG00000045589	-3.1632
ENSMUSG00000025373	-5.38082
ENSMUSG00000025026	-2.44026
ENSMUSG00000034324	-4.01205
ENSMUSG00000031660	-4.69376
ENSMUSG00000060288	-3.26202
ENSMUSG00000012017	-4.16747
ENSMUSG00000033373	-4.16411
ENSMUSG00000032773	-4.7362
ENSMUSG00000070564	-3.99677
ENSMUSG00000029198	-3.59527
ENSMUSG00000034435	-2.17052
ENSMUSG00000007653	-3.94542
ENSMUSG00000035206	-4.44097
ENSMUSG00000049641	-3.10967
ENSMUSG00000024806	-2.86607
ENSMUSG00000040264	-0.11227
ENSMUSG00000016503	-3.14369
ENSMUSG00000049932	-1.67181
ENSMUSG00000004508	-4.42322
ENSMUSG00000043613	-0.79636
ENSMUSG00000024771	-4.5021
ENSMUSG00000037419	-2.50742
ENSMUSG00000048387	-2.63013
ENSMUSG00000038175	-2.17345
ENSMUSG00000090083	-4.24907
ENSMUSG00000078137	-2.81198
ENSMUSG00000044626	-4.39532
ENSMUSG00000006179	-3.10917
ENSMUSG00000071256	-5.1218
ENSMUSG00000026754	-4.71672
ENSMUSG00000070999	-5.32655
ENSMUSG00000044227	-5.56115
ENSMUSG00000048495	-3.31804
ENSMUSG00000071648	-4.01438
ENSMUSG00000052520	-3.42694
ENSMUSG00000069189	-5.38805
ENSMUSG00000027164	-5.5503
ENSMUSG00000031871	-3.48342
ENSMUSG00000037089	-4.17345
ENSMUSG00000035804	-4.38413
ENSMUSG00000059355	-3.33759
ENSMUSG00000036151	-3.10867
ENSMUSG00000038280	-5.16256
ENSMUSG00000019864	-4.28574
ENSMUSG00000028341	-4.83033
ENSMUSG00000001827	-2.48835
ENSMUSG00000038608	-2.67521
ENSMUSG00000035352	-0.17452
ENSMUSG00000019558	-2.77113
ENSMUSG00000003166	-4.38866
ENSMUSG00000023904	-2.99217
ENSMUSG00000018927	-0.90174
ENSMUSG00000043832	-1.22766
ENSMUSG00000035783	-2.51062
ENSMUSG00000052214	-4.45356
ENSMUSG00000045106	-3.82767
ENSMUSG00000033862	-3.85163
ENSMUSG00000084174	-3.45561
ENSMUSG00000036743	-2.83764
ENSMUSG00000027229	-4.61211
ENSMUSG00000039886	-2.47209
ENSMUSG00000053398	-2.85475
ENSMUSG00000054455	-4.52949
ENSMUSG00000020143	-3.18784
ENSMUSG00000039202	-3.35137
ENSMUSG00000031458	-3.2684
ENSMUSG00000028364	-0.70512
ENSMUSG00000022613	-4.47041
ENSMUSG00000067608	-2.1689
ENSMUSG00000042599	-2.35424
ENSMUSG00000022783	-3.97846
ENSMUSG00000054191	-2.79937
ENSMUSG00000040752	-3.14586
ENSMUSG00000040797	-4.12482
ENSMUSG00000029005	-4.61105
ENSMUSG00000026275	-4.06178
ENSMUSG00000024294	-4.23596
ENSMUSG00000024073	-5.0517
ENSMUSG00000029179	-5.47265
ENSMUSG00000027605	-2.70632
ENSMUSG00000028906	-3.72318
ENSMUSG00000024786	-4.63272
ENSMUSG00000031388	-3.13835
ENSMUSG00000025078	-3.53399
ENSMUSG00000025940	-3.2223
ENSMUSG00000058672	-1.29853
ENSMUSG00000017832	-4.30929
ENSMUSG00000031645	-3.23923
ENSMUSG00000041782	-2.32352
ENSMUSG00000018486	-5.87408
ENSMUSG00000001248	-3.0474
ENSMUSG00000002028	-3.31646
ENSMUSG00000020668	-5.04788
ENSMUSG00000025189	-4.60964
ENSMUSG00000005566	-3.50046
ENSMUSG00000009894	-3.17176
ENSMUSG00000035666	-4.98165
ENSMUSG00000028550	-3.21652
ENSMUSG00000036057	-4.33818
ENSMUSG00000058594	-4.46785
ENSMUSG00000021003	-2.85559
ENSMUSG00000030470	-0.83593
ENSMUSG00000016409	-3.91724
ENSMUSG00000044820	-4.97892
ENSMUSG00000037197	-4.02703
ENSMUSG00000029066	-3.37064
ENSMUSG00000048647	-3.39806
ENSMUSG00000043858	-3.2053
ENSMUSG00000022442	-3.1291
ENSMUSG00000047854	-3.68538
ENSMUSG00000047692	-5.23406
ENSMUSG00000026171	-4.01999
ENSMUSG00000024532	-4.81076
ENSMUSG00000021282	-3.34887
ENSMUSG00000031026	-4.20556
ENSMUSG00000038845	-2.45553
ENSMUSG00000032513	-4.9381
ENSMUSG00000036138	-3.07582
ENSMUSG00000021097	-4.51821
ENSMUSG00000001918	-2.13924
ENSMUSG00000046523	-3.65091
ENSMUSG00000025017	-3.16734
ENSMUSG00000032553	-3.89475
ENSMUSG00000024096	-4.39411
ENSMUSG00000054452	-2.80803
ENSMUSG00000036478	-1.49139
ENSMUSG00000009580	-3.25994
ENSMUSG00000041958	-3.87684
ENSMUSG00000031778	-3.87514
ENSMUSG00000032352	-3.47859
ENSMUSG00000028109	-4.02585
ENSMUSG00000046321	-4.553
ENSMUSG00000074004	-4.05122
ENSMUSG00000006641	-3.47762
ENSMUSG00000037797	-2.71995
ENSMUSG00000052566	-3.25594
ENSMUSG00000030316	-4.19681
ENSMUSG00000036356	-2.33054
ENSMUSG00000041773	-1.99206
ENSMUSG00000021600	-5.41612
ENSMUSG00000028165	-4.39047
ENSMUSG00000022756	-3.86208
ENSMUSG00000004980	-3.58381
ENSMUSG00000037904	-3.48487
ENSMUSG00000031772	-4.20876
ENSMUSG00000024182	-5.02938
ENSMUSG00000022455	-4.99217
ENSMUSG00000034912	-4.11879
ENSMUSG00000036244	-4.93501
ENSMUSG00000043252	-2.6753
ENSMUSG00000061759	-4.64891
ENSMUSG00000050188	-2.60806
ENSMUSG00000055835	-4.16877
ENSMUSG00000024436	-2.80168
ENSMUSG00000038871	-2.19846
ENSMUSG00000029646	-4.67743
ENSMUSG00000023175	-2.53634
ENSMUSG00000056537	-5.54625
ENSMUSG00000042724	-4.51787
ENSMUSG00000022386	-4.03552
ENSMUSG00000033396	-4.14127
ENSMUSG00000032308	-5.27258
ENSMUSG00000055078	-3.13949
ENSMUSG00000020630	-4.29534
ENSMUSG00000015354	-1.14746
ENSMUSG00000041684	-3.23705
ENSMUSG00000070462	-4.18626
ENSMUSG00000031517	-1.7219
ENSMUSG00000047352	-4.4618
ENSMUSG00000022488	-2.3349
ENSMUSG00000099481	-4.33672
ENSMUSG00000028715	-0.71028
ENSMUSG00000062705	-6.01252
ENSMUSG00000038954	-3.43456
ENSMUSG00000016526	-2.1678
ENSMUSG00000031731	-4.79867
ENSMUSG00000027896	-3.68966
ENSMUSG00000020434	-5.52882
ENSMUSG00000038025	-5.62167
ENSMUSG00000025056	-3.32843
ENSMUSG00000044827	-1.24499
ENSMUSG00000026237	-4.82051
ENSMUSG00000020908	-1.08155
ENSMUSG00000000869	-3.94786
ENSMUSG00000003437	-4.00324
ENSMUSG00000028631	-3.71672
ENSMUSG00000002846	-3.16204
ENSMUSG00000037049	-2.87239
ENSMUSG00000020329	-3.79967
ENSMUSG00000045763	-0.91056
ENSMUSG00000029255	-6.95859
ENSMUSG00000022993	-4.25291
ENSMUSG00000051802	-2.58615
ENSMUSG00000031979	-5.20983
ENSMUSG00000025041	-3.88513
ENSMUSG00000005677	-3.41889
ENSMUSG00000038406	-3.68001
ENSMUSG00000001786	-4.15098
ENSMUSG00000028028	-5.32308
ENSMUSG00000026388	-3.60367
ENSMUSG00000030579	-0.79456
ENSMUSG00000071267	-3.08547
ENSMUSG00000055679	-5.53082
ENSMUSG00000049653	-5.4112
ENSMUSG00000049134	-2.38496
ENSMUSG00000029501	-4.45736
ENSMUSG00000035179	-4.13441
ENSMUSG00000029169	-3.74449
ENSMUSG00000016619	-4.31818
ENSMUSG00000063506	-3.02891
ENSMUSG00000029864	-2.3684
ENSMUSG00000021977	-4.88215
ENSMUSG00000072845	-1.98793
ENSMUSG00000044647	-5.27593
ENSMUSG00000032348	-1.03617
ENSMUSG00000034928	-3.83177
ENSMUSG00000055200	-3.57021
ENSMUSG00000056829	-5.21571
ENSMUSG00000024973	-5.41427
ENSMUSG00000025317	-2.74391
ENSMUSG00000059412	-4.00347
ENSMUSG00000037406	-2.17573
ENSMUSG00000031585	-3.31732
ENSMUSG00000038481	-2.80904
ENSMUSG00000055943	-4.88683
ENSMUSG00000031298	-3.09099
ENSMUSG00000026882	-5.0613
ENSMUSG00000021816	-4.51457
ENSMUSG00000050424	-3.51276
ENSMUSG00000012609	-5.04692
ENSMUSG00000031813	-3.68427
ENSMUSG00000054693	-2.82828
ENSMUSG00000032375	-2.9179
ENSMUSG00000040652	-3.42942
ENSMUSG00000055447	-3.47377
ENSMUSG00000023106	-4.29676
ENSMUSG00000029504	-3.85288
ENSMUSG00000028978	-3.79446
ENSMUSG00000021715	-3.38669
ENSMUSG00000016982	-4.68112
ENSMUSG00000039157	-2.6295
ENSMUSG00000031066	-2.623
ENSMUSG00000022013	-2.54246
ENSMUSG00000034032	-5.43409
ENSMUSG00000028845	-3.52301
ENSMUSG00000020461	-5.17971
ENSMUSG00000006732	-2.87684
ENSMUSG00000031935	-5.45356
ENSMUSG00000017686	-5.99217
ENSMUSG00000025404	-3.54979
ENSMUSG00000021598	-3.98119
ENSMUSG00000024734	-4.1667
ENSMUSG00000048920	-4.31072
ENSMUSG00000078591	-4.72853
ENSMUSG00000025899	-4.06733
ENSMUSG00000018916	-1.87091
ENSMUSG00000053617	-4.08951
ENSMUSG00000036411	-3.4155
ENSMUSG00000019803	-3.59022
ENSMUSG00000024114	-5.0275
ENSMUSG00000074825	-4.74468
ENSMUSG00000025982	-4.06299
ENSMUSG00000031708	-2.88417
ENSMUSG00000024799	-2.0248
ENSMUSG00000029591	-2.63317
ENSMUSG00000068732	-5.24277
ENSMUSG00000053729	-4.17423
ENSMUSG00000099083	-5.16256
ENSMUSG00000047213	-3.64386
ENSMUSG00000034317	-2.05859
ENSMUSG00000024735	-3.96083
ENSMUSG00000009090	-4.09468
ENSMUSG00000046922	-4.79266
ENSMUSG00000020581	-3.69376
ENSMUSG00000019790	-4.19337
ENSMUSG00000025066	-3.30557
ENSMUSG00000021071	-3.64891
ENSMUSG00000040842	-4.39927
ENSMUSG00000051242	-2.95411
ENSMUSG00000062110	-4.76533
ENSMUSG00000047412	-4.43596
ENSMUSG00000031779	-2.64214
ENSMUSG00000022061	-4.37512
ENSMUSG00000015745	-2.75809
ENSMUSG00000029108	-2.63451
ENSMUSG00000019210	-4.44254
ENSMUSG00000058396	-3.4288
ENSMUSG00000019880	-3.68854
ENSMUSG00000002324	-3.44442
ENSMUSG00000038203	-4.632
ENSMUSG00000027483	-1.0373
ENSMUSG00000061923	-4.32597
ENSMUSG00000047108	-4.63594
ENSMUSG00000045064	-5.16463
ENSMUSG00000031392	-4.24715
ENSMUSG00000029534	-2.99977
ENSMUSG00000050248	-3.47714
ENSMUSG00000049892	-2.78976
ENSMUSG00000070570	-3.93611
ENSMUSG00000027670	-3.0275
ENSMUSG00000022136	-3.2503
ENSMUSG00000053161	-5.09493
ENSMUSG00000024142	-4.6569
ENSMUSG00000031652	-3.06142
ENSMUSG00000021481	-4.44756
ENSMUSG00000021510	-4.05481
ENSMUSG00000027636	-4.5649
ENSMUSG00000043542	-3.07194
ENSMUSG00000029370	-2.06927
ENSMUSG00000054013	-4.27341
ENSMUSG00000035896	-1.9981
ENSMUSG00000032398	-5.12885
ENSMUSG00000027643	-4.96263
ENSMUSG00000023140	-2.86828
ENSMUSG00000025395	-1.28732
ENSMUSG00000052928	-3.15213
ENSMUSG00000030798	-2.9788
ENSMUSG00000029272	-0.23866
ENSMUSG00000018930	-1.16185
ENSMUSG00000032289	-2.86491
ENSMUSG00000058173	-3.05974
ENSMUSG00000040640	-2.74671
ENSMUSG00000021965	-3.26562
ENSMUSG00000015944	-4.26784
ENSMUSG00000005268	-3.33672
ENSMUSG00000039753	-2.70745
ENSMUSG00000044279	-4.43972
ENSMUSG00000025961	-5.69825
ENSMUSG00000048856	-3.34461
ENSMUSG00000030401	-1.77285
ENSMUSG00000028318	-2.52957
ENSMUSG00000069206	-2.33344
ENSMUSG00000055271	-5.15843
ENSMUSG00000031701	-4.16722
ENSMUSG00000095026	-4.70425
ENSMUSG00000013076	-3.26064
ENSMUSG00000015314	-4.08927
ENSMUSG00000024442	-3.91659
ENSMUSG00000079562	-4.44003
ENSMUSG00000090273	-5.31387
ENSMUSG00000076438	-4.86481
ENSMUSG00000046204	-5.04501
ENSMUSG00000029311	-2.99493
ENSMUSG00000028803	-3.55182
ENSMUSG00000066235	-4.16903
ENSMUSG00000070469	-2.4504
ENSMUSG00000024764	-3.41704
ENSMUSG00000050241	-3.56439
ENSMUSG00000041203	-4.30244
ENSMUSG00000026121	-2.61776
ENSMUSG00000039375	-5.22216
ENSMUSG00000027762	-1.53868
ENSMUSG00000025355	-2.30372
ENSMUSG00000039914	-3.16592
ENSMUSG00000022394	-4.33206
ENSMUSG00000051910	-2.89464
ENSMUSG00000039304	-2.26209
ENSMUSG00000026812	-5.1218
ENSMUSG00000021795	-2.46713
ENSMUSG00000021065	-2.76004
ENSMUSG00000027163	-4.04668
ENSMUSG00000034432	-4.3133
ENSMUSG00000035592	-2.25725
ENSMUSG00000031684	-4.14867
ENSMUSG00000035235	-2.45403
ENSMUSG00000018339	-1.30882
ENSMUSG00000031351	-4.13441
ENSMUSG00000031004	-0.00254
ENSMUSG00000069255	-3.25705
ENSMUSG00000093674	-3.10482
ENSMUSG00000020653	-2.86523
ENSMUSG00000032596	-2.6238
ENSMUSG00000039176	-4.24113
ENSMUSG00000075327	-5.1976
ENSMUSG00000028298	-3.90703
ENSMUSG00000020594	-3.74082
ENSMUSG00000022663	-4.6975
ENSMUSG00000049680	-5.14407
ENSMUSG00000067818	-1.19922
ENSMUSG00000028681	-4.97755
ENSMUSG00000026946	-1.97228
ENSMUSG00000028274	-4.62843
ENSMUSG00000001518	-3.53952
ENSMUSG00000071984	-4.29336
ENSMUSG00000057363	-4.09443
ENSMUSG00000068940	-4.31847
ENSMUSG00000037410	-2.66914
ENSMUSG00000060257	-4.90487
ENSMUSG00000053318	-0.7537
ENSMUSG00000036553	-4.11104
ENSMUSG00000034422	-2.11023
ENSMUSG00000030747	-2.26472
ENSMUSG00000008763	-4.18863
ENSMUSG00000045691	-4.42043
ENSMUSG00000028259	-4.26451
ENSMUSG00000059772	-5.28884
ENSMUSG00000028646	-3.9771
ENSMUSG00000032966	-3.43737
ENSMUSG00000046658	-5.2184
ENSMUSG00000038312	-3.13657
ENSMUSG00000090622	-4.0613
ENSMUSG00000038332	-1.61617
ENSMUSG00000035890	-3.74952
ENSMUSG00000044906	-3.38805
ENSMUSG00000014329	-1.2063
ENSMUSG00000060098	-3.99677
ENSMUSG00000037747	-5.01532
ENSMUSG00000057074	-1.71677
ENSMUSG00000055067	-4.8984
ENSMUSG00000021893	-3.54827
ENSMUSG00000079065	-4.31387
ENSMUSG00000079015	-2.04621
ENSMUSG00000023224	-1.25922
ENSMUSG00000040472	-4.16359
ENSMUSG00000019932	-3.46833
ENSMUSG00000036896	-0.62491
ENSMUSG00000067889	-4.5021
ENSMUSG00000022354	-3.75575
ENSMUSG00000045693	-5.19443
ENSMUSG00000040913	-3.94053
ENSMUSG00000071660	-4.12961
ENSMUSG00000070699	-4.11579
ENSMUSG00000025916	-4.75633
ENSMUSG00000021990	-2.25512
ENSMUSG00000026950	-0.45991
ENSMUSG00000004319	-3.49916
ENSMUSG00000027859	-2.7821
ENSMUSG00000037007	-4.38052
ENSMUSG00000074215	-4.29761
ENSMUSG00000022449	-2.20164
ENSMUSG00000027820	-2.14982
ENSMUSG00000021068	-3.42849
ENSMUSG00000040396	-4.97937
ENSMUSG00000023022	-3.52135
ENSMUSG00000028280	-4.1011
ENSMUSG00000041632	-3.3325
ENSMUSG00000031171	-5.09987
ENSMUSG00000000838	-4.40385
ENSMUSG00000038537	-5.65908
ENSMUSG00000069668	-0.36515
ENSMUSG00000044134	-4.43753
ENSMUSG00000041747	-3.699
ENSMUSG00000021319	-2.26576
ENSMUSG00000020362	-3.46021
ENSMUSG00000004654	-5.14102
ENSMUSG00000027562	-1.20586
ENSMUSG00000022678	-3.61599
ENSMUSG00000031430	-5.03457
ENSMUSG00000005705	-3.91094
ENSMUSG00000045410	-5.07048
ENSMUSG00000036169	-2.90045
ENSMUSG00000015377	-5
ENSMUSG00000006574	-2.25099
ENSMUSG00000025266	-3.8427
ENSMUSG00000068184	-3.43035
ENSMUSG00000038119	-3.99654
ENSMUSG00000060992	-3.662
ENSMUSG00000026708	-1.94497
ENSMUSG00000028101	-3.91506
ENSMUSG00000025702	-2.9295
ENSMUSG00000043866	-3.5355
ENSMUSG00000041708	-4.77794
ENSMUSG00000034023	-4.90358
ENSMUSG00000051067	-4.28209
ENSMUSG00000048481	-4.24687
ENSMUSG00000064147	-3.22986
ENSMUSG00000032480	-4.12431
ENSMUSG00000027852	-3.78647
ENSMUSG00000053436	-4.56081
ENSMUSG00000039109	-0.9559
ENSMUSG00000038506	-4.63738
ENSMUSG00000021278	-2.64774
ENSMUSG00000075427	-4.88427
ENSMUSG00000040624	-4.00694
ENSMUSG00000029260	-2.79756
ENSMUSG00000034810	-2.2119
ENSMUSG00000034528	-4.34637
ENSMUSG00000029071	-3.98462
ENSMUSG00000040287	-2.2453
ENSMUSG00000038812	-4.56969
ENSMUSG00000052821	-2.38345
ENSMUSG00000020456	-4.07412
ENSMUSG00000062591	-2.81522
ENSMUSG00000009621	-4.65472
ENSMUSG00000091734	-5.67448
ENSMUSG00000034171	-3.66933
ENSMUSG00000024220	-4.38473
ENSMUSG00000043289	-3.34198
ENSMUSG00000050675	-3.67448
ENSMUSG00000035621	-4.99447
ENSMUSG00000027953	-3.08632
ENSMUSG00000020419	-5.19707
ENSMUSG00000041840	-2.2969
ENSMUSG00000029153	-2.56764
ENSMUSG00000021501	-3.99401
ENSMUSG00000020227	-2.35026
ENSMUSG00000032116	-4.11754
ENSMUSG00000049699	-4.26202
ENSMUSG00000002996	-2.80118
ENSMUSG00000032310	-2.74574
ENSMUSG00000003070	-4.88854
ENSMUSG00000028744	-3.37124
ENSMUSG00000036442	-3.08779
ENSMUSG00000037960	-3.11679
ENSMUSG00000031210	-4.54759
ENSMUSG00000029822	-1.78314
ENSMUSG00000024045	-3.87218
ENSMUSG00000016637	-3.6372
ENSMUSG00000079055	-4.50931
ENSMUSG00000017969	-1.41185
ENSMUSG00000096188	-3.63756
ENSMUSG00000032333	-2.92643
ENSMUSG00000045409	-3.4504
ENSMUSG00000037013	-3.59981
ENSMUSG00000014504	-3.80692
ENSMUSG00000095620	-3.96962
ENSMUSG00000024395	-2.45997
ENSMUSG00000036098	-3.23026
ENSMUSG00000031669	-3.70162
ENSMUSG00000038068	-2.58139
ENSMUSG00000036815	-4.51523
ENSMUSG00000020212	-2.37101
ENSMUSG00000042351	-4.91702
ENSMUSG00000029802	-2.18994
ENSMUSG00000026473	-1.82455
ENSMUSG00000030785	-1.19846
ENSMUSG00000026931	-4.36142
ENSMUSG00000024990	-2.05104
ENSMUSG00000023926	-3.07923
ENSMUSG00000022372	-2.35078
ENSMUSG00000020713	-2.36691
ENSMUSG00000017776	-4.16929
ENSMUSG00000031367	-2.58243
ENSMUSG00000058152	-3.13822
ENSMUSG00000048992	-4.09715
ENSMUSG00000096795	-5.39471
ENSMUSG00000072966	-2.89604
ENSMUSG00000022323	-2.29541
ENSMUSG00000017754	-1.71246
ENSMUSG00000063887	-5.29223
ENSMUSG00000032530	-4.14765
ENSMUSG00000003190	-5.60964
ENSMUSG00000006378	-5.13037
ENSMUSG00000031201	-4.64711
ENSMUSG00000031712	-1.38424
ENSMUSG00000032006	-3.19734
ENSMUSG00000021997	-4.55809
ENSMUSG00000090891	-5.31101
ENSMUSG00000032094	-1.78299
ENSMUSG00000059714	-2.98427
ENSMUSG00000043549	-4.99401
ENSMUSG00000027454	-1.27739
ENSMUSG00000074500	-4.7823
ENSMUSG00000064141	-3.96061
ENSMUSG00000091971	0.13948
ENSMUSG00000005615	-3.32699
ENSMUSG00000025731	-3.70407
ENSMUSG00000028413	-3.241
ENSMUSG00000020074	-3.31617
ENSMUSG00000078941	-3.33876
ENSMUSG00000000563	-3.66456
ENSMUSG00000056270	-1.97613
ENSMUSG00000043671	-3.09739
ENSMUSG00000042111	-3.31531
ENSMUSG00000050445	-1.75117
ENSMUSG00000005864	-4.58866
ENSMUSG00000057236	-4.03103
ENSMUSG00000041052	-4.28799
ENSMUSG00000027677	-4.4894
ENSMUSG00000093692	-4.91311
ENSMUSG00000023169	-2.07728
ENSMUSG00000040520	-2.66868
ENSMUSG00000029622	-4.20929
ENSMUSG00000028456	-4.09542
ENSMUSG00000034729	-4.53082
ENSMUSG00000009670	-3.36602
ENSMUSG00000033114	-2.9962
ENSMUSG00000026407	-1.535
ENSMUSG00000028062	-3.34476
ENSMUSG00000050587	-4.48649
ENSMUSG00000029093	-2.40706
ENSMUSG00000021886	-0.92873
ENSMUSG00000040865	-4.46881
ENSMUSG00000002129	-4.8997
ENSMUSG00000033220	-2.747
ENSMUSG00000057723	-2.80793
ENSMUSG00000025867	-4.07266
ENSMUSG00000031840	-3.93876
ENSMUSG00000069835	-3.78886
ENSMUSG00000021556	-2.15952
ENSMUSG00000060962	-1.10454
ENSMUSG00000020483	-3.61971
ENSMUSG00000026354	-3.31574
ENSMUSG00000024912	-1.73461
ENSMUSG00000004056	-4.27704
ENSMUSG00000047749	-2.925
ENSMUSG00000033579	-3.09999
ENSMUSG00000020609	-3.52849
ENSMUSG00000021108	-3.18929
ENSMUSG00000042451	-1.17017
ENSMUSG00000029767	-3.25223
ENSMUSG00000051107	-4.13037
ENSMUSG00000079428	-1.45498
ENSMUSG00000036022	-2.489
ENSMUSG00000050379	-4.2365
ENSMUSG00000034789	-3.69582
ENSMUSG00000038902	-5.31732
ENSMUSG00000043448	-5.60542
ENSMUSG00000039768	-4.60823
ENSMUSG00000032244	-3.60595
ENSMUSG00000026077	-3.35964
ENSMUSG00000024810	-0.68416
ENSMUSG00000024027	-3.92161
ENSMUSG00000024347	-4.09296
ENSMUSG00000074746	-4.26119
ENSMUSG00000035852	-3.44316
ENSMUSG00000054893	-2.97983
ENSMUSG00000044594	-2.24646
ENSMUSG00000050295	-2.88278
ENSMUSG00000023938	-5.18338
ENSMUSG00000064373	-1.40274
ENSMUSG00000059479	-3.38745
ENSMUSG00000037722	-2.99862
ENSMUSG00000056071	0.3893
ENSMUSG00000031738	-4.88342
ENSMUSG00000023013	-4.83403
ENSMUSG00000016308	-3.33789
ENSMUSG00000026980	-1.92019
ENSMUSG00000099913	-2.81462
ENSMUSG00000024598	-2.13119
ENSMUSG00000048218	-2.6742
ENSMUSG00000067713	-4.9412
ENSMUSG00000013973	-3.95277
ENSMUSG00000049548	-4.43471
ENSMUSG00000046668	-2.87853
ENSMUSG00000033510	-3.78309
ENSMUSG00000029415	-3.68427
ENSMUSG00000034382	-3.39608
ENSMUSG00000031997	-2.76503
ENSMUSG00000041891	-3.30386
ENSMUSG00000059552	-3.27327
ENSMUSG00000048174	-4.66018
ENSMUSG00000031545	-5.43909
ENSMUSG00000025389	-4.37842
ENSMUSG00000022884	-2.73812
ENSMUSG00000000381	-4.35343
ENSMUSG00000025488	-0.82391
ENSMUSG00000016477	-4.26701
ENSMUSG00000001558	-4.03884
ENSMUSG00000031562	-2.10364
ENSMUSG00000058351	-2.53567
ENSMUSG00000022673	-1.19529
ENSMUSG00000024660	-1.95104
ENSMUSG00000032915	-2.09129
ENSMUSG00000037005	-4.4669
ENSMUSG00000019990	-3.73044
ENSMUSG00000028228	-3.64097
ENSMUSG00000040321	-3.94653
ENSMUSG00000023041	-1.03336
ENSMUSG00000027297	-4.27621
ENSMUSG00000032409	-3.61228
ENSMUSG00000021495	-3.46053
ENSMUSG00000047638	-3.17606
ENSMUSG00000042816	-4.30216
ENSMUSG00000034059	-3.00961
ENSMUSG00000024083	-3.54237
ENSMUSG00000061118	-3.57004
ENSMUSG00000041718	-4.47041
ENSMUSG00000049691	-5.59911
ENSMUSG00000027210	-2.02891
ENSMUSG00000024191	-3.387
ENSMUSG00000023963	-1.54924
ENSMUSG00000069806	-4.43471
ENSMUSG00000051335	-3.17072
ENSMUSG00000058070	-3.36587
ENSMUSG00000036964	-5.32366
ENSMUSG00000030327	-3.61035
ENSMUSG00000037270	-4.44442
ENSMUSG00000049303	-3.37722
ENSMUSG00000071847	-2.01013
ENSMUSG00000023411	-4.23841
ENSMUSG00000022833	-4.09123
ENSMUSG00000026621	-3.78409
ENSMUSG00000050965	-2.80299
ENSMUSG00000030876	-2.95042
ENSMUSG00000003555	-1.89063
ENSMUSG00000020973	-3.25636
ENSMUSG00000010592	-3.03777
ENSMUSG00000021624	-3.50275
ENSMUSG00000018672	-2.47907
ENSMUSG00000004540	-5.25429
ENSMUSG00000057143	-2.32938
ENSMUSG00000084234	-5.38443
ENSMUSG00000040435	-2.13885
ENSMUSG00000094584	-4.80349
ENSMUSG00000044526	-4.73697
ENSMUSG00000063049	-3.26271
ENSMUSG00000045205	-2.89808
ENSMUSG00000029909	-4.955
ENSMUSG00000061455	-4.46849
ENSMUSG00000058298	-4.58797
ENSMUSG00000039450	-2.36001
ENSMUSG00000069565	-3.61052
ENSMUSG00000056144	-2.96601
ENSMUSG00000044641	-3.01357
ENSMUSG00000049717	-2.83177
ENSMUSG00000041736	-2.28441
ENSMUSG00000028730	-3.3373
ENSMUSG00000095595	-3.40476
ENSMUSG00000031924	-3.17267
ENSMUSG00000067430	-4.81888
ENSMUSG00000035580	-4.64205
ENSMUSG00000026070	-2.36632
ENSMUSG00000031610	-2.75965
ENSMUSG00000001229	-3.79827
ENSMUSG00000015597	-4.51095
ENSMUSG00000027612	-6.08021
ENSMUSG00000005089	-2.98131
ENSMUSG00000046096	-4.09394
ENSMUSG00000040013	-4.67779
ENSMUSG00000028005	-2.63066
ENSMUSG00000025860	-4.79346
ENSMUSG00000031951	-3.9203
ENSMUSG00000057176	-3.35152
ENSMUSG00000028950	-3.75263
ENSMUSG00000001062	-4.92533
ENSMUSG00000040627	-3.04097
ENSMUSG00000031698	-2.56995
ENSMUSG00000049946	-4.99769
ENSMUSG00000047507	-2.89787
ENSMUSG00000037239	-3.57794
ENSMUSG00000017561	-3.45815
ENSMUSG00000048000	-4.21411
ENSMUSG00000054978	-4.22945
ENSMUSG00000066383	-4.39714
ENSMUSG00000028958	-4.87578
ENSMUSG00000000708	-2.93412
ENSMUSG00000028668	-4.50046
ENSMUSG00000090019	-3.19959
ENSMUSG00000030271	-5.0037
ENSMUSG00000000001	-3.34476
ENSMUSG00000020547	-3.04967
ENSMUSG00000003484	-3.92906
ENSMUSG00000030629	-3.9053
ENSMUSG00000038591	-3.10333
ENSMUSG00000051251	-4.19443
ENSMUSG00000004842	-5.24441
ENSMUSG00000021200	-1.88539
ENSMUSG00000047894	-3.46371
ENSMUSG00000027088	-4.42043
ENSMUSG00000038300	-5.39108
ENSMUSG00000042523	-4.58831
ENSMUSG00000061259	-3.7118
ENSMUSG00000035653	-4.58623
ENSMUSG00000030612	-3.36409
ENSMUSG00000064329	-4.1976
ENSMUSG00000007989	-4.43004
ENSMUSG00000053560	-1.67388
ENSMUSG00000072673	-5.33352
ENSMUSG00000057286	-3.96894
ENSMUSG00000026430	-1.77211
ENSMUSG00000035919	-3.34446
ENSMUSG00000022400	-3.78488
ENSMUSG00000024855	-3.36468
ENSMUSG00000020439	-2.33047
ENSMUSG00000032717	-5.38805
ENSMUSG00000032120	-5.22162
ENSMUSG00000052955	-5.2659
ENSMUSG00000038235	-2.82368
ENSMUSG00000025171	-4.61954
ENSMUSG00000025001	-2.68446
ENSMUSG00000024997	-3.17997
ENSMUSG00000053054	-3.29223
ENSMUSG00000029405	-3.98279
ENSMUSG00000022214	-2.98576
ENSMUSG00000023828	-2.16851
ENSMUSG00000027347	-3.37707
ENSMUSG00000035198	-2.69853
ENSMUSG00000062773	-4.45514
ENSMUSG00000035248	-3.65927
ENSMUSG00000052336	-2.68168
ENSMUSG00000026659	-5.1083
ENSMUSG00000024429	-4.89111
ENSMUSG00000064158	-4.46562
ENSMUSG00000028073	-5.20556
ENSMUSG00000034799	-4.63702
ENSMUSG00000028864	-2.80955
ENSMUSG00000045273	-1.61427
ENSMUSG00000037795	-4.39532
ENSMUSG00000062651	-4.76611
ENSMUSG00000027861	-1.2856
ENSMUSG00000004018	-5.08021
ENSMUSG00000073295	-3.58762
ENSMUSG00000049321	-4.75205
ENSMUSG00000052934	-2.90239
ENSMUSG00000031592	-3.51721
ENSMUSG00000067571	-4.89926
ENSMUSG00000031101	-2.3018
ENSMUSG00000021700	-4.00023
ENSMUSG00000047002	-4.9053
ENSMUSG00000042138	-3.51227
ENSMUSG00000033728	-4.65472
ENSMUSG00000058806	-2.91322
ENSMUSG00000042256	-4.31933
ENSMUSG00000032253	-4.34051
ENSMUSG00000010538	-2.6904
ENSMUSG00000044562	-3.06685
ENSMUSG00000029410	-4.1291
ENSMUSG00000038354	-2.99827
ENSMUSG00000032869	-3.85517
ENSMUSG00000023945	-3.54422
ENSMUSG00000018166	-1.49659
ENSMUSG00000020672	-3.12167
ENSMUSG00000085795	-4.13593
ENSMUSG00000019647	-3.87938
ENSMUSG00000027368	-1.86271
ENSMUSG00000022468	-3.00474
ENSMUSG00000000957	-1.96612
ENSMUSG00000046259	-1.56247
ENSMUSG00000053289	-3.98919
ENSMUSG00000031400	-4.00694
ENSMUSG00000074886	-3.26979
ENSMUSG00000028461	-3.1801
ENSMUSG00000024682	-4.57484
ENSMUSG00000006611	-3.04299
ENSMUSG00000028920	-5.02327
ENSMUSG00000031622	-4.00833
ENSMUSG00000001366	-3.63022
ENSMUSG00000048410	-4.9694
ENSMUSG00000029343	-3.76709
ENSMUSG00000026385	-3.20383
ENSMUSG00000030110	-3.20423
ENSMUSG00000019518	-4.37752
ENSMUSG00000042734	-3.02691
ENSMUSG00000056296	-2.492
ENSMUSG00000047810	-2.9371
ENSMUSG00000037989	-4.15894
ENSMUSG00000029352	-3.15162
ENSMUSG00000028256	-4.97483
ENSMUSG00000061535	-3.54523
ENSMUSG00000044951	-1.2693
ENSMUSG00000024072	-3.43487
ENSMUSG00000062075	-3.50455
ENSMUSG00000042271	-2.72185
ENSMUSG00000030451	-5.26257
ENSMUSG00000031297	-2.20211
ENSMUSG00000026840	-4.74468
ENSMUSG00000001482	-4.50406
ENSMUSG00000012117	-4.70614
ENSMUSG00000019194	-3.92621
ENSMUSG00000003363	-2.22749
ENSMUSG00000033819	-4.63022
ENSMUSG00000020021	-3.38775
ENSMUSG00000019810	-5.80229
ENSMUSG00000068890	-2.84456
ENSMUSG00000039316	-2.58009
ENSMUSG00000028212	-0.90649
ENSMUSG00000021799	-5.51095
ENSMUSG00000043557	-4.55334
ENSMUSG00000041992	-2.50857
ENSMUSG00000025043	-5.25374
ENSMUSG00000036111	-2.96759
ENSMUSG00000020986	-3.32049
ENSMUSG00000043065	-4.07
ENSMUSG00000021361	-2.63873
ENSMUSG00000050103	-2.14344
ENSMUSG00000039954	-3.73831
ENSMUSG00000026843	-3.32424
ENSMUSG00000037519	-4.70275
ENSMUSG00000031270	-5.71482
ENSMUSG00000020743	-4.60507
ENSMUSG00000033847	-3.56201
ENSMUSG00000024085	-2.63882
ENSMUSG00000003541	-0.45607
ENSMUSG00000013150	-4.27704
ENSMUSG00000054763	-3.41335
ENSMUSG00000021514	-5.66566
ENSMUSG00000027718	-4.34755
ENSMUSG00000051341	-2.66548
ENSMUSG00000039634	-3.6919
ENSMUSG00000041827	-0.85697
ENSMUSG00000040928	-4.39168
ENSMUSG00000037355	-5.68557
ENSMUSG00000030528	-2.60551
ENSMUSG00000032601	-3.22082
ENSMUSG00000057469	-2.95422
ENSMUSG00000030223	-2.63013
ENSMUSG00000036402	-3.08253
ENSMUSG00000013662	-4.3373
ENSMUSG00000040372	-5.42291
ENSMUSG00000050650	-5.7665
ENSMUSG00000019841	-5.06419
ENSMUSG00000038248	-4.42663
ENSMUSG00000046768	-1.33821
ENSMUSG00000035923	-2.78022
ENSMUSG00000024905	-5.25705
ENSMUSG00000024231	-4.15354
ENSMUSG00000026196	-3.77458
ENSMUSG00000048782	-3.07206
ENSMUSG00000020536	-3.91202
ENSMUSG00000068922	-3.46498
ENSMUSG00000042688	-4.16773
ENSMUSG00000068117	-5.01672
ENSMUSG00000049091	-2.91376
ENSMUSG00000024622	-5.19443
ENSMUSG00000055003	-3.34784
ENSMUSG00000026885	-3.2783
ENSMUSG00000079614	-3.93589
ENSMUSG00000030249	-2.63828
ENSMUSG00000029110	-3.91419
ENSMUSG00000067594	-2.99424
ENSMUSG00000059436	-2.97937
ENSMUSG00000026069	-1.57966
ENSMUSG00000024140	-2.5917
ENSMUSG00000021669	-4.14918
ENSMUSG00000030259	-3.82972
ENSMUSG00000067038	-4.11104
ENSMUSG00000030733	-5.72853
ENSMUSG00000049086	-3.37168
ENSMUSG00000069456	-3.87345
ENSMUSG00000030247	-2.48867
ENSMUSG00000026012	-1.73437
ENSMUSG00000055643	-5.67374
ENSMUSG00000038398	-3.76239
ENSMUSG00000005533	-2.829
ENSMUSG00000027832	-0.24069
ENSMUSG00000006676	-5.71331
ENSMUSG00000001419	-4.56456
ENSMUSG00000004393	-3.02397
ENSMUSG00000038526	-2.36595
ENSMUSG00000037210	-5.21732
ENSMUSG00000073102	-2.76376
ENSMUSG00000027481	-4.73658
ENSMUSG00000020585	-3.36438
ENSMUSG00000020635	-2.91648
ENSMUSG00000031838	-1.87456
ENSMUSG00000030849	-2.90649
ENSMUSG00000032212	-3.73658
ENSMUSG00000055963	-3.07936
ENSMUSG00000034801	-2.71776
ENSMUSG00000024583	-4.23162
ENSMUSG00000021704	-3.4907
ENSMUSG00000020427	-1.37295
ENSMUSG00000041923	-5.03505
ENSMUSG00000039384	-3.2137
ENSMUSG00000019820	-4.08021
ENSMUSG00000040219	-3.5661
ENSMUSG00000029281	-4.97846
ENSMUSG00000032187	-3.35107
ENSMUSG00000024827	-2.54566
ENSMUSG00000054966	-5.05553
ENSMUSG00000057541	-2.27327
ENSMUSG00000051726	-4.04573
ENSMUSG00000075284	-2.78468
ENSMUSG00000020963	-5.25594
ENSMUSG00000020994	-3.42787
ENSMUSG00000019848	-2.37827
ENSMUSG00000032180	-4.27118
ENSMUSG00000043313	-3.79907
ENSMUSG00000024878	-3.09369
ENSMUSG00000035781	-3.55453
ENSMUSG00000059586	-4.02444
ENSMUSG00000093989	-3.78508
ENSMUSG00000038122	-3.10346
ENSMUSG00000033156	-5.44914
ENSMUSG00000029552	-1.95472
ENSMUSG00000027889	-3.3215
ENSMUSG00000041592	-4.39259
ENSMUSG00000037824	-2.79026
ENSMUSG00000031913	-3.94453
ENSMUSG00000025425	-4.08632
ENSMUSG00000029559	-3.91506
ENSMUSG00000020580	-3.54019
ENSMUSG00000008318	-4.54221
ENSMUSG00000063615	-5.26424
ENSMUSG00000047757	-1.9018
ENSMUSG00000017929	-3.63379
ENSMUSG00000070547	-4.09888
ENSMUSG00000021785	-3.13822
ENSMUSG00000033022	-1.22806
ENSMUSG00000029672	-3.04883
ENSMUSG00000040034	-2.83424
ENSMUSG00000031182	-6.61387
ENSMUSG00000024841	-3.81218
ENSMUSG00000021114	-3.05146
ENSMUSG00000003051	-2.91267
ENSMUSG00000024537	-3.31933
ENSMUSG00000049420	-4.9885
ENSMUSG00000026936	-5.55368
ENSMUSG00000041439	-3.01345
ENSMUSG00000032279	-3.29251
ENSMUSG00000024947	-3.69078
ENSMUSG00000024135	-3.8132
ENSMUSG00000032291	-1.73413
ENSMUSG00000039841	-3.55334
ENSMUSG00000106864	-4.80591
ENSMUSG00000035547	-3.52102
ENSMUSG00000045658	-4.57932
ENSMUSG00000029270	-2.13486
ENSMUSG00000051486	-5.72547
ENSMUSG00000027715	-0.63998
ENSMUSG00000031809	-5.0807
ENSMUSG00000026726	-2.65136
ENSMUSG00000060738	-4.78468
ENSMUSG00000036231	-3.82644
ENSMUSG00000035754	-4.29647
ENSMUSG00000036333	-4.24742
ENSMUSG00000026797	-3.30216
ENSMUSG00000022098	-3.15611
ENSMUSG00000027499	-1.86475
ENSMUSG00000053980	-4.95143
ENSMUSG00000078349	-3.2037
ENSMUSG00000023967	-3.42229
ENSMUSG00000078810	-4.50373
ENSMUSG00000057894	-4.07048
ENSMUSG00000040729	-3.95747
ENSMUSG00000061374	-3.61476
ENSMUSG00000037260	-2.75185
ENSMUSG00000043982	-3.11279
ENSMUSG00000019295	-4.52085
ENSMUSG00000003458	-3.57433
ENSMUSG00000035863	-3.96331
ENSMUSG00000021357	-4.41642
ENSMUSG00000031543	-4.10557
ENSMUSG00000036503	-4.65981
ENSMUSG00000022126	0.15615
ENSMUSG00000024168	-2.66337
ENSMUSG00000073678	-2.61123
ENSMUSG00000031179	-3.73428
ENSMUSG00000052429	-2.3815
ENSMUSG00000002032	-3.39775
ENSMUSG00000022658	-3.96511
ENSMUSG00000036432	-2.85778
ENSMUSG00000024972	-4.05865
ENSMUSG00000061311	-2.48948
ENSMUSG00000036941	-4.43659
ENSMUSG00000011382	-3.34681
ENSMUSG00000031482	-3.80611
ENSMUSG00000024366	-4.37692
ENSMUSG00000063895	-3.83774
ENSMUSG00000058550	-3.67613
ENSMUSG00000021680	-3.30972
ENSMUSG00000033880	-0.89105
ENSMUSG00000031385	-4.39927
ENSMUSG00000026866	-3.15239
ENSMUSG00000030366	-4.88427
ENSMUSG00000050761	-2.02134
ENSMUSG00000074272	-2.3171
ENSMUSG00000024982	-4.03009
ENSMUSG00000022180	-2.36662
ENSMUSG00000033184	-3.90747
ENSMUSG00000047492	-3.10793
ENSMUSG00000022336	-3.68279
ENSMUSG00000039148	-5.55571
ENSMUSG00000034579	-4.17945
ENSMUSG00000059089	-0.65772
ENSMUSG00000027870	-1.71478
ENSMUSG00000071356	-2.11585
ENSMUSG00000026579	-1.94092
ENSMUSG00000091212	-2.35505
ENSMUSG00000023367	-1.77083
ENSMUSG00000030103	-1.58078
ENSMUSG00000029707	-5.3013
ENSMUSG00000024241	-5.33352
ENSMUSG00000019846	-2.50251
ENSMUSG00000044352	-2.45293
ENSMUSG00000051154	-2.85862
ENSMUSG00000057777	-3.25456
ENSMUSG00000046971	-3.95478
ENSMUSG00000075229	-2.67798
ENSMUSG00000042650	-4.2133
ENSMUSG00000005871	-4.24086
ENSMUSG00000039656	-3.92906
ENSMUSG00000048070	-3.68372
ENSMUSG00000025958	-4.47586
ENSMUSG00000024831	-5.05937
ENSMUSG00000011884	-2.74381
ENSMUSG00000032217	-3.82358
ENSMUSG00000027737	-1.28065
ENSMUSG00000045555	-3.75263
ENSMUSG00000013858	-4.94742
ENSMUSG00000050345	-3.27984
ENSMUSG00000046753	-4.33964
ENSMUSG00000006019	-3.97324
ENSMUSG00000020542	-4.12557
ENSMUSG00000066721	-5.11079
ENSMUSG00000021519	-4.99862
ENSMUSG00000079852	-3.23189
ENSMUSG00000047034	-3.56593
ENSMUSG00000041697	-3.9066
ENSMUSG00000025486	-2.65899
ENSMUSG00000026322	-5.10631
ENSMUSG00000003200	-4.1839
ENSMUSG00000071650	-3.76513
ENSMUSG00000049353	-5.92139
ENSMUSG00000036106	-3.26534
ENSMUSG00000060166	-5.44536
ENSMUSG00000022240	-2.05805
ENSMUSG00000026696	-3.96398
ENSMUSG00000025482	-4.98576
ENSMUSG00000020627	-2.93578
ENSMUSG00000031958	-3.46069
ENSMUSG00000095098	-3.0295
ENSMUSG00000033080	-6.05122
ENSMUSG00000046573	-3.35373
ENSMUSG00000030278	-0.95453
ENSMUSG00000025945	-4.16747
ENSMUSG00000045867	-3.45372
ENSMUSG00000037720	-3.72967
ENSMUSG00000038260	-3.01625
ENSMUSG00000019471	-4.54187
ENSMUSG00000069833	-2.69498
ENSMUSG00000050635	-1.88236
ENSMUSG00000030534	-3.91899
ENSMUSG00000037759	-2.09296
ENSMUSG00000029090	-4.49981
ENSMUSG00000021614	-1.75809
ENSMUSG00000008843	-3.27188
ENSMUSG00000015405	-3.90703
ENSMUSG00000050967	-4.04692
ENSMUSG00000000223	-4.52749
ENSMUSG00000052549	-4.55843
ENSMUSG00000038080	-2.67669
ENSMUSG00000033149	-2.25539
ENSMUSG00000020832	-4.57175
ENSMUSG00000037568	-2.96488
ENSMUSG00000031181	-4.64169
ENSMUSG00000022247	-3.2863
ENSMUSG00000051224	-3.28237
ENSMUSG00000038495	-3.72662
ENSMUSG00000058427	0.87372
ENSMUSG00000035528	-4.62736
ENSMUSG00000020892	-4.40568
ENSMUSG00000048458	-4.24605
ENSMUSG00000056509	-4.39958
ENSMUSG00000000244	-3.14446
ENSMUSG00000029819	-1.66736
ENSMUSG00000039601	-1.97943
ENSMUSG00000019373	-5.99034
ENSMUSG00000038738	-4.95456
ENSMUSG00000028096	-3.42958
ENSMUSG00000053184	-5.01625
ENSMUSG00000014592	-4.04573
ENSMUSG00000038542	-4.16204
ENSMUSG00000007050	-2.01561
ENSMUSG00000074591	-4.89196
ENSMUSG00000030050	-5.702
ENSMUSG00000044544	-5.38504
ENSMUSG00000033436	-1.96957
ENSMUSG00000035372	-2.61768
ENSMUSG00000025533	-2.88353
ENSMUSG00000061906	-1.8098
ENSMUSG00000036966	-4.22028
ENSMUSG00000014496	-3.25003
ENSMUSG00000044912	-3.63272
ENSMUSG00000028778	-4.79586
ENSMUSG00000024357	-3.17306
ENSMUSG00000038267	-2.4773
ENSMUSG00000021271	-3.16307
ENSMUSG00000056494	-5.26979
ENSMUSG00000038059	-1.89615
ENSMUSG00000048865	-3.44128
ENSMUSG00000033917	-2.97053
ENSMUSG00000033624	-3.48778
ENSMUSG00000036977	-4.17111
ENSMUSG00000028468	-3.92555
ENSMUSG00000020389	-4.85642
ENSMUSG00000032489	-4.39047
ENSMUSG00000028345	-3.14727
ENSMUSG00000034575	-3.87176
ENSMUSG00000041375	-4.34139
ENSMUSG00000058835	-4.01205
ENSMUSG00000024800	-3.21076
ENSMUSG00000003623	-2.30465
ENSMUSG00000020125	-2.67484
ENSMUSG00000035202	-4.75283
ENSMUSG00000041064	-4.73044
ENSMUSG00000019461	-4.14586
ENSMUSG00000036009	-5.09148
ENSMUSG00000003068	-3.9053
ENSMUSG00000026572	-5.4669
ENSMUSG00000030660	-4.21437
ENSMUSG00000057193	-3.34711
ENSMUSG00000032454	-3.43409
ENSMUSG00000041911	-2.71558
ENSMUSG00000025932	-3.49753
ENSMUSG00000046899	-5.43846
ENSMUSG00000068876	-4.18023
ENSMUSG00000039741	-4.57828
ENSMUSG00000040414	-3.46769
ENSMUSG00000051146	-2.71881
ENSMUSG00000025473	-0.94372
ENSMUSG00000025665	-2.71388
ENSMUSG00000024515	-3.98211
ENSMUSG00000078444	-4.6453
ENSMUSG00000044199	-3.66859
ENSMUSG00000036083	-3.09999
ENSMUSG00000033082	-2.93181
ENSMUSG00000026228	-2.50799
ENSMUSG00000027894	-5.21464
ENSMUSG00000055555	-4.41089
ENSMUSG00000031534	-3.26673
ENSMUSG00000027913	-1.11779
ENSMUSG00000037465	-1.67627
ENSMUSG00000030519	-3.92052
ENSMUSG00000031828	-4.39775
ENSMUSG00000029134	-5.84063
ENSMUSG00000022186	-2.8246
ENSMUSG00000033256	-3.57364
ENSMUSG00000070777	-3.69806
ENSMUSG00000027827	-3.26022
ENSMUSG00000020250	-2.75147
ENSMUSG00000043998	-3.24264
ENSMUSG00000031896	-2.32092
ENSMUSG00000024787	-3.67043
ENSMUSG00000074059	-4.8779
ENSMUSG00000066867	-4.49362
ENSMUSG00000034311	-1.8456
ENSMUSG00000063358	-4.84601
ENSMUSG00000031758	-5.41673
ENSMUSG00000034177	-2.77942
ENSMUSG00000056174	-1.81644
ENSMUSG00000017588	-2.39547
ENSMUSG00000043940	-4.48552
ENSMUSG00000047694	-3.97551
ENSMUSG00000021147	-5.05793
ENSMUSG00000063785	-4.75633
ENSMUSG00000027071	-3.34256
ENSMUSG00000063145	-3.39123
ENSMUSG00000055707	-4.50766
ENSMUSG00000021346	-5.55097
ENSMUSG00000044715	-4.20423
ENSMUSG00000025784	-2.99862
ENSMUSG00000029686	-3.73581
ENSMUSG00000021254	-5.17345
ENSMUSG00000034445	-3.94164
ENSMUSG00000022132	-2.77903
ENSMUSG00000035278	-3.59388
ENSMUSG00000052302	-4.25291
ENSMUSG00000005371	-2.87387
ENSMUSG00000038604	-3.04501
ENSMUSG00000029679	-5.45926
ENSMUSG00000031216	-2.73504
ENSMUSG00000057335	-2.97245
ENSMUSG00000026963	-5.16411
ENSMUSG00000024270	-2.96962
ENSMUSG00000029235	-3.2856
ENSMUSG00000064128	-2.1839
ENSMUSG00000023993	-3.93236
ENSMUSG00000020520	-4.03599
ENSMUSG00000033159	-3.37288
ENSMUSG00000039427	-4.05098
ENSMUSG00000020273	-3.05278
ENSMUSG00000047878	-3.32655
ENSMUSG00000038768	-1.61963
[truncated: 10,425 more rows]

## Sheet: Fly
Gene-ID	GEP
FBgn0037191	-0.70132
FBgn0036810	-2.81899
FBgn0033320	-1.65622
FBgn0262980	-3.79746
FBgn0004635	-1.1347
FBgn0038397	-3.33803
FBgn0261992	-1.81522
FBgn0038220	-3.20317
FBgn0010583	-2.98154
FBgn0032906	-1.25367
FBgn0025583	0.84675
FBgn0031321	-2.3873
FBgn0052568	-0.91208
FBgn0085397	-4.27397
FBgn0030674	-3.40645
FBgn0263232	-3.26216
FBgn0038427	-4.70501
FBgn0033233	-2.90877
FBgn0035787	-3.69245
FBgn0033736	-3.72585
FBgn0031885	-3.48892
FBgn0020503	-2.72929
FBgn0051439	-0.85095
FBgn0035785	-4.08314
FBgn0039673	-4.79026
FBgn0051717	-3.2849
FBgn0002732	-1.95713
FBgn0031751	0.14897
FBgn0266599	-4.33323
FBgn0040005	-2.62638
FBgn0040477	-1.3734
FBgn0066084	-5.90747
FBgn0000053	-1.02947
FBgn0267795	-2.4587
FBgn0038481	-0.86899
FBgn0034162	-1.26424
FBgn0005632	-2.65426
FBgn0034860	-0.84936
FBgn0259979	-2.93005
FBgn0051140	-2.74894
FBgn0038959	-1.96545
FBgn0034138	-4.73966
FBgn0003388	-3.18036
FBgn0034945	-2.87165
FBgn0033272	-3.18141
FBgn0050428	-1.17651
FBgn0033556	-3.44348
FBgn0027341	-2.06413
FBgn0261804	-6.47521
FBgn0029606	-5.13644
FBgn0036465	-2.07273
FBgn0037100	-4.28265
FBgn0027610	-1.7555
FBgn0038834	-3.57897
FBgn0027550	-2.8135
FBgn0039198	-4.58727
FBgn0037109	-2.48382
FBgn0052251	-2.02034
FBgn0031987	-2.73063
FBgn0034548	-4.46466
FBgn0038092	-3.59214
FBgn0037010	-3.06637
FBgn0037895	-2.63774
FBgn0034477	-1.58879
FBgn0013772	-0.1151
FBgn0038437	-2.42725
FBgn0038389	-3.06625
FBgn0031426	-1.25041
FBgn0038760	-2.79266
FBgn0052450	-0.30741
FBgn0001187	-1.34755
FBgn0028671	-3.1428
FBgn0054043	-1.01654
FBgn0015614	-3.38368
FBgn0032359	-5.32135
FBgn0028717	-2.29039
FBgn0032450	-2.20051
FBgn0033327	0.02732
FBgn0051820	-0.18246
FBgn0020299	-1.265
FBgn0034537	-3.14344
FBgn0260745	-1.98667
FBgn0050469	-6.34403
FBgn0030286	-2.57553
FBgn0051933	-2.35986
FBgn0263321	-4.0386
FBgn0030503	-2.84684
FBgn0028491	-3.33003
FBgn0039359	-4.12004
FBgn0000241	-1.92281
FBgn0261241	-2.91246
FBgn0259239	-5.1213
FBgn0033907	-2.8511
FBgn0265351	-3.13936
FBgn0032208	-3.28701
FBgn0003742	-3.43503
FBgn0038199	-1.9025
FBgn0037042	-3.36647
FBgn0002121	-1.76734
FBgn0035812	-2.15547
FBgn0032940	-3.51227
FBgn0039684	-1.78627
FBgn0033392	-2.2512
FBgn0026427	-2.89164
FBgn0063491	-0.93338
FBgn0264492	-3.80007
FBgn0037648	-2.89271
FBgn0262870	-5.19654
FBgn0033154	-5.23841
FBgn0259184	-1.19205
FBgn0031822	-3.15213
FBgn0034543	-2.30073
FBgn0036731	-1.13701
FBgn0004580	-1.45202
FBgn0036849	-4.0654
FBgn0036825	-4.29025
FBgn0034655	-1.16046
FBgn0005617	-2.85831
FBgn0259173	-3.26147
FBgn0052457	-0.57381
FBgn0036212	-3.13733
FBgn0044811	-0.65681
FBgn0027514	-1.64607
FBgn0033855	-2.55038
FBgn0032445	-3.47586
FBgn0266429	-3.86628
FBgn0030586	-1.39908
FBgn0263072	-5.85559
FBgn0036556	-2.34828
FBgn0037590	-5.44411
FBgn0032633	-1.53902
FBgn0036618	-5.08902
FBgn0047338	-0.24265
FBgn0015765	-2.87176
FBgn0040812	-1.33094
FBgn0250907	-1.7336
FBgn0086362	-3.45546
FBgn0263600	-2.47762
FBgn0035542	-1.90444
FBgn0032626	-1.46411
FBgn0053494	-0.8225
FBgn0033434	-3.06745
FBgn0039797	-0.89352
FBgn0267348	-2.23074
FBgn0036124	-2.35292
FBgn0034106	-6.02186
FBgn0086768	-3.94586
FBgn0003462	-3.52616
FBgn0033888	-0.72497
FBgn0038639	-3.03198
FBgn0037260	-4.7171
FBgn0003731	-2.6766
FBgn0038542	-5.1218
FBgn0250845	-0.83138
FBgn0004875	-2.40369
FBgn0051648	-2.99424
FBgn0035928	-5.61954
FBgn0034440	-0.29527
FBgn0031851	-2.18521
FBgn0261596	-4.70087
FBgn0029877	-1.79892
FBgn0035517	-2.34586
FBgn0263929	-3.8535
FBgn0035823	-0.99464
FBgn0011660	-1.95115
FBgn0036411	-4.6708
FBgn0025608	-3.76926
FBgn0260397	-2.6674
FBgn0037763	-1.60253
FBgn0035360	-2.09906
FBgn0033388	-2.23487
FBgn0033337	-3.33424
FBgn0053272	-2.16236
FBgn0028542	-1.73384
FBgn0004588	0.06994
FBgn0261789	-2.64629
FBgn0261986	-2.52492
FBgn0034295	-0.67553
FBgn0036772	-1.63949
FBgn0031782	-2.5782
FBgn0036752	-0.66612
FBgn0262518	-2.6013
FBgn0051195	-2.49411
FBgn0050115	-4.11654
FBgn0052392	-1.49452
FBgn0037870	-2.63451
FBgn0031562	-2.01165
FBgn0000157	-3.88427
FBgn0040279	-1.82016
FBgn0038423	-0.41208
FBgn0034867	-3.74236
FBgn0015754	-2.25925
FBgn0026398	-4.50766
FBgn0051675	-3.05949
FBgn0041235	-5.80955
FBgn0036936	-4.61211
FBgn0035932	-4.77873
FBgn0034345	-4.35078
FBgn0002873	-2.52052
FBgn0029657	-1.78682
FBgn0039739	-2.12193
FBgn0051665	-3.02151
FBgn0001218	-3.41396
FBgn0259712	-6.11679
FBgn0259749	-3.13087
FBgn0030570	-2.52907
FBgn0037546	-3.09345
FBgn0038586	-3.69806
FBgn0033138	-1.5425
FBgn0036759	-2.53835
FBgn0001319	-4.92139
FBgn0038621	-5.04549
FBgn0029158	-3.81827
FBgn0001974	-3.08094
FBgn0014075	-3.34652
FBgn0040637	-3.20756
FBgn0039873	-1.32315
FBgn0031568	-5.35284
FBgn0030778	-2.91583
FBgn0040099	-0.79764
FBgn0033249	-2.72566
FBgn0031473	-4.80108
FBgn0033167	-3.6238
FBgn0026369	-2.90909
FBgn0039283	-2.34586
FBgn0037000	-1.97647
FBgn0036066	-3.76376
FBgn0085390	-6.73312
FBgn0040694	-0.96494
FBgn0001995	-2.87557
FBgn0039723	-3.65417
FBgn0034186	-2.60639
FBgn0036414	-4.48132
FBgn0034666	-4.88087
FBgn0036142	-2.65845
FBgn0034976	-2.65599
FBgn0264002	-5.95054
FBgn0037741	-2.47089
FBgn0039861	-2.81228
FBgn0259982	-2.66292
FBgn0051774	-4.28574
FBgn0050496	-2.47073
FBgn0032149	-2.97994
FBgn0039249	-3.28209
FBgn0037992	-1.45882
FBgn0051627	-0.95176
FBgn0033931	-1.0994
FBgn0035014	-0.9628
FBgn0036667	-3.34505
FBgn0052068	-2.99011
FBgn0032897	-1.45609
FBgn0020766	-2.92139
FBgn0036173	-4.40202
FBgn0036532	-1.9267
FBgn0086695	-1.46283
FBgn0035059	-4.32684
FBgn0031643	-2.00167
FBgn0014848	-3.186
FBgn0034592	-0.93368
FBgn0031315	-3.38896
FBgn0036780	-2.03493
FBgn0069242	-3.09567
FBgn0040074	-1.07142
FBgn0261938	-2.33847
FBgn0050383	-2.19482
FBgn0033058	-5.2061
FBgn0030120	-2.60016
FBgn0038709	-1.1818
FBgn0031530	-3.67466
FBgn0085303	-0.92766
FBgn0031468	-2.71786
FBgn0050016	-1.49443
FBgn0039238	-3.03659
FBgn0028430	-1.65795
FBgn0030837	-1.56525
FBgn0051635	-4.4316
FBgn0037848	-3.03127
FBgn0035538	-2.48633
FBgn0010414	-2.66658
FBgn0034151	-3.05673
FBgn0032058	-2.7824
FBgn0001125	-2.5813
FBgn0031279	-1.12683
FBgn0027054	-3.50865
FBgn0005666	-0.82828
FBgn0050354	-0.49419
FBgn0028689	-3.30929
FBgn0260750	-3.07254
FBgn0086757	-2.33381
FBgn0030648	-4.60367
FBgn0259938	-2.26736
FBgn0047351	0.04522
FBgn0020416	-1.07266
FBgn0015271	-2.61723
FBgn0038432	-2.71653
FBgn0020018	-3.74662
FBgn0024319	-5.34227
FBgn0034259	-1.55279
FBgn0034270	-2.80622
FBgn0052100	-3.13987
FBgn0264270	-2.85069
FBgn0052110	-2.16871
FBgn0032859	-2.52807
FBgn0025878	-3.32323
FBgn0262478	-0.83197
FBgn0028983	-1.89325
FBgn0037019	-2.94898
FBgn0030107	-2.69488
FBgn0036491	-3.03363
FBgn0032111	-0.54237
FBgn0085415	-4.06154
FBgn0035558	-1.16715
FBgn0053757	-2.61334
FBgn0014879	-2.32684
FBgn0053784	-3.75049
FBgn0038201	-5.06613
FBgn0050476	-2.8831
FBgn0032656	-2.50422
FBgn0023545	-3.72509
FBgn0023172	-2.6346
FBgn0261276	-2.91921
FBgn0265262	-2.06715
FBgn0003087	-0.72373
FBgn0034967	-4.76102
FBgn0025366	-2.66529
FBgn0036227	-0.96731
FBgn0037238	-2.63891
FBgn0053325	-3.73793
FBgn0032746	-3.773
FBgn0036208	-2.36045
FBgn0024912	-1.28969
FBgn0037668	-1.57764
FBgn0031529	-4.15354
FBgn0032869	-1.09289
FBgn0034389	-3.21612
FBgn0033373	-2.67126
FBgn0002593	-5.25484
FBgn0001222	-3.17046
FBgn0033813	-3.96353
FBgn0033543	-2.17619
FBgn0039443	-2.31984
FBgn0260944	-3.36349
FBgn0043577	0.08951
FBgn0039338	-3.39562
FBgn0005642	-2.73889
FBgn0017578	-3.88747
FBgn0039112	-3.44379
FBgn0051718	-5.06709
FBgn0038528	-2.49281
FBgn0033079	-0.44615
FBgn0032474	-2.6381
FBgn0000180	-1.06082
FBgn0036230	-3.74005
FBgn0035719	-5.43035
FBgn0015278	-3.15946
FBgn0037447	-2.13917
FBgn0051957	-2.81939
FBgn0024555	-2.12652
FBgn0266420	-0.82882
FBgn0010381	0.85972
FBgn0032405	-0.94242
FBgn0031650	-4.32482
FBgn0035407	-3.09542
FBgn0031249	-0.22803
FBgn0034639	-2.7538
FBgn0033699	-4.31101
FBgn0036627	-2.12828
FBgn0028402	-3.66823
FBgn0019957	-3.43222
FBgn0262531	0.65138
FBgn0039628	-2.39146
FBgn0038286	-2.06028
FBgn0031516	-2.72442
FBgn0033913	-1.95428
FBgn0040629	-0.97966
FBgn0054054	-1.28856
FBgn0087040	-1.18613
FBgn0035859	-1.41978
FBgn0035663	-2.55809
FBgn0026749	-3.36424
FBgn0052945	-0.39348
FBgn0031500	-2.92073
FBgn0033206	-3.1935
FBgn0034689	-3.27244
FBgn0036427	-3.43191
FBgn0032229	-3.94453
FBgn0050081	-5.45926
FBgn0042131	-1.90833
FBgn0015575	-1.8707
FBgn0039855	-2.28441
FBgn0030893	-2.76709
FBgn0013997	-2.68919
FBgn0038967	-2.31301
FBgn0031068	-2.91094
FBgn0038331	-2.74468
FBgn0035161	-0.57465
FBgn0010100	-2.97166
FBgn0022160	-0.96322
FBgn0040653	0.09102
FBgn0039434	-1.298
FBgn0027070	-1.91012
FBgn0037818	-1.66356
FBgn0031308	-2.8483
FBgn0033608	-3.14663
FBgn0027791	-3.305
FBgn0058470	-1.70524
FBgn0036330	-1.87377
FBgn0000075	-2.30879
FBgn0050401	-4.30244
FBgn0267002	-2.23997
FBgn0263355	-5.40324
FBgn0031003	-3.07875
FBgn0051921	-1.19955
FBgn0051007	-0.6772
FBgn0035710	-1.99741
FBgn0017567	-3.47618
FBgn0002440	-1.57441
FBgn0038558	-1.91262
FBgn0032036	-2.44128
FBgn0011305	-2.23406
FBgn0036959	-2.85569
FBgn0033486	-3.17358
FBgn0033225	-2.69059
FBgn0031398	-2.57209
FBgn0052189	-2.86628
FBgn0266124	-3.0354
FBgn0032692	-5.19232
FBgn0025712	-2.15104
FBgn0039469	-2.55376
FBgn0083949	-6.4985
FBgn0028932	-3.91246
FBgn0003071	-1.87044
FBgn0039994	-2.6416
FBgn0263601	-3.16075
FBgn0032664	-0.81264
FBgn0036952	-0.34958
FBgn0051473	-1.83975
FBgn0050065	-1.04493
FBgn0034470	-0.67595
FBgn0034158	-1.61273
FBgn0036819	-2.84001
FBgn0025469	-2.54473
FBgn0266916	-2.30009
FBgn0031244	-3.42446
FBgn0034455	-3.18128
FBgn0033994	-3.10321
FBgn0031711	-4.04859
FBgn0052150	-4.44348
FBgn0050125	-5.18338
FBgn0052479	-2.47353
FBgn0039108	-2.11141
FBgn0003250	-1.99694
FBgn0021856	-3.90747
FBgn0002778	-1.8364
FBgn0034049	-3.84747
FBgn0264294	-3.04478
FBgn0036274	-4.9712
FBgn0000299	-1.59279
FBgn0261290	-2.86019
FBgn0001989	-3.11204
FBgn0027596	-5.5255
FBgn0036795	-3.33964
FBgn0045470	-4.98805
FBgn0037114	-1.70929
FBgn0034420	-2.98119
FBgn0038157	-5.9328
FBgn0011674	-1.01905
FBgn0261794	-2.23223
FBgn0023095	-3.86544
FBgn0051064	-3.94786
FBgn0036467	-0.33955
FBgn0259952	-2.99551
FBgn0038681	-1.03878
FBgn0033601	-4.38987
FBgn0031702	-2.11823
FBgn0040056	-3.24523
FBgn0038551	-2.58217
FBgn0037515	-1.29371
FBgn0263607	-2.93379
FBgn0003396	-2.29477
FBgn0038102	-1.63541
FBgn0027108	-1.89014
FBgn0046685	-2.86512
FBgn0035839	-3.62451
FBgn0026389	-5.18968
FBgn0050033	-2.66997
FBgn0035553	-1.45391
FBgn0034839	-3.45293
FBgn0032799	-3.10644
FBgn0022029	-2.42384
FBgn0032601	-1.91479
FBgn0039900	-1.50242
FBgn0037792	-2.2479
FBgn0031908	-1.65877
FBgn0037340	-3.4894
FBgn0001120	-0.6564
FBgn0037082	-2.37116
FBgn0032922	-2.34095
FBgn0039101	-3.2184
FBgn0036727	-2.48536
FBgn0035751	-3.41535
FBgn0015520	-1.95098
FBgn0005655	-0.99611
FBgn0034617	-3.40431
FBgn0041709	-0.98782
FBgn0032439	-1.94937
FBgn0026417	-2.50332
FBgn0015316	-1.01074
FBgn0002716	-4.78707
FBgn0261881	-3.69675
FBgn0033864	-1.8726
FBgn0027587	-2.81431
FBgn0000071	-0.19359
FBgn0033983	-1.85282
FBgn0031295	-0.54785
FBgn0053544	-4.86775
FBgn0038915	-2.1676
FBgn0086605	-4.03884
FBgn0034501	-1.57308
FBgn0037315	-2.44945
FBgn0044826	-2.503
FBgn0035888	-4.69227
FBgn0052107	-1.94569
FBgn0030745	-1.82659
FBgn0250834	-0.64858
FBgn0033212	-3.8039
FBgn0022224	-2.64792
FBgn0036527	-4.54591
FBgn0035122	-2.56098
FBgn0011764	-2.6175
FBgn0039260	-2.99355
FBgn0040531	-2.18679
FBgn0038879	-2.00979
FBgn0034713	-1.8657
FBgn0030593	-0.46618
FBgn0039467	-2.0308
FBgn0038872	-2.46236
FBgn0035799	-3.05457
FBgn0086690	-4.62273
FBgn0260991	-1.71425
FBgn0033809	-1.97404
FBgn0032055	-2.05493
FBgn0037721	-2.037
FBgn0031975	-2.2623
FBgn0037976	-2.15277
FBgn0037203	-1.31495
FBgn0034791	-3.58294
FBgn0016031	-2.07412
FBgn0032457	-1.28216
FBgn0036394	-0.7134
FBgn0038150	-3.9295
FBgn0035473	-2.44867
FBgn0085423	-5.18915
FBgn0023395	-1.28311
FBgn0053125	-0.88761
FBgn0034066	-3.94209
FBgn0001179	-2.21759
FBgn0031804	-4.0386
FBgn0035689	-2.47121
FBgn0031384	-3.0194
FBgn0000527	0.09133
FBgn0014133	-2.79686
FBgn0035498	-2.4155
FBgn0033784	-3.02644
FBgn0266464	-3.61405
FBgn0083969	-4.62096
FBgn0036239	-2.99815
FBgn0262102	-1.1322
FBgn0033725	-0.49046
FBgn0037603	-3.33789
FBgn0035379	-2.36706
FBgn0003275	-3.55504
FBgn0036495	-4.14153
FBgn0052117	-0.50496
FBgn0028412	-0.5692
FBgn0034099	-1.57523
FBgn0038475	-2.6122
FBgn0036111	-2.76562
FBgn0020930	-4.00903
FBgn0030719	-3.22324
FBgn0040212	-3.05661
FBgn0028507	-2.91659
FBgn0039156	-1.71288
FBgn0039544	-2.42981
FBgn0052085	-1.62167
FBgn0035985	-1.73721
FBgn0031347	-1.1785
FBgn0036676	-2.93038
FBgn0029766	-0.1736
FBgn0038763	-3.19959
FBgn0036581	-3.21424
FBgn0036940	-1.85043
FBgn0051015	-1.9072
FBgn0004367	-3.87324
FBgn0035025	-2.72204
FBgn0262737	-2.30522
FBgn0262484	-2.3655
FBgn0264494	-1.78856
FBgn0033792	-0.72435
FBgn0038890	-3.36974
FBgn0037035	-0.91213
FBgn0035268	-3.07923
FBgn0037552	-2.35122
FBgn0019886	-3.47153
FBgn0033656	-3.97846
FBgn0034842	-0.87089
FBgn0027493	-2.14957
FBgn0033349	-2.96455
FBgn0032291	-1.74434
FBgn0010278	-1.60577
FBgn0000422	-0.69848
FBgn0051952	-1.55457
FBgn0032812	-3.75438
FBgn0036188	-2.78767
FBgn0033353	-3.75809
FBgn0036155	-5.84146
FBgn0031389	-1.41831
FBgn0054003	-1.5561
FBgn0038849	-3.13822
FBgn0261673	-2.43035
FBgn0034288	-0.33081
FBgn0050076	-4.50014
FBgn0036306	-3.08522
FBgn0031722	-2.06715
FBgn0038143	-2.03842
FBgn0010825	-4.05457
FBgn0036354	-2.07364
FBgn0035449	-3.10892
FBgn0028743	-2.29541
FBgn0262111	-4.57553
FBgn0085458	-5.56388
FBgn0037227	-2.20257
FBgn0033139	-1.53839
FBgn0013810	-2.62593
FBgn0031571	-4.21277
FBgn0003360	-3.15843
FBgn0032819	-1.86686
FBgn0036896	-1.81634
FBgn0065110	-4.34931
FBgn0037027	-3.49948
FBgn0034709	-0.59667
FBgn0051802	-0.55093
FBgn0039441	-1.06362
FBgn0031738	-2.29279
FBgn0037549	-3.72147
FBgn0036622	-1.0576
FBgn0035104	-3.86502
FBgn0015544	-2.93523
FBgn0000094	-2.22972
FBgn0261293	-5.6167
FBgn0004381	-2.19595
FBgn0064227	-4.89454
FBgn0036017	-5.20663
FBgn0035583	-1.83578
FBgn0039958	-2.45285
FBgn0036340	-3.28546
FBgn0032645	-3.29378
FBgn0036734	-3.47281
FBgn0033715	-2.70519
FBgn0042201	-2.23087
FBgn0053140	-1.06634
FBgn0031693	-1.33308
FBgn0029945	-1.75687
FBgn0265606	-1.97092
FBgn0051800	-3.17997
FBgn0034391	-1.89916
FBgn0052311	-5.53149
FBgn0031462	-1.81578
FBgn0035960	-2.9463
FBgn0034360	-2.92161
FBgn0033184	-2.90703
FBgn0036470	-1.23474
FBgn0053147	-3.44536
FBgn0032969	-0.83514
FBgn0045038	-3.71786
FBgn0031903	-5.50373
FBgn0031700	-1.06431
FBgn0039732	-3.65345
FBgn0037483	-1.48568
FBgn0004896	-4.07315
FBgn0038608	-0.86965
FBgn0042138	-2.93027
FBgn0039402	-3.25333
FBgn0038470	-0.90341
FBgn0034925	-3.82439
FBgn0035471	-2.9869
FBgn0040732	-1.40358
FBgn0033469	-3.28069
FBgn0031409	-4.17867
FBgn0033968	-2.32164
FBgn0011211	-3.29732
FBgn0034804	-1.64192
FBgn0031834	-3.36691
FBgn0036250	-5.62167
FBgn0000579	-2.93799
FBgn0039131	-1.48908
FBgn0265272	-0.99608
FBgn0259703	-6.43596
FBgn0087011	-4.72585
FBgn0027784	-3.16592
FBgn0028841	-1.59227
FBgn0032768	-1.06891
FBgn0051789	-0.81059
FBgn0032244	-1.47437
FBgn0037280	-4.28405
FBgn0259682	-2.95624
FBgn0036977	-4.36617
FBgn0043043	-3.97778
FBgn0038705	-3.52433
FBgn0034626	-3.14599
FBgn0038130	-0.86197
FBgn0034215	-3.05182
FBgn0027503	-3.13176
FBgn0036704	-1.61237
FBgn0040849	-4.97211
FBgn0032839	-1.98696
FBgn0033021	-2.71757
FBgn0002174	-2.77211
FBgn0039235	-1.54709
FBgn0005778	-1.74836
FBgn0262976	-2.58424
FBgn0039044	-2.06739
FBgn0039201	-3.31703
FBgn0000063	-1.82322
FBgn0038773	-3.02974
FBgn0037835	-0.78946
FBgn0032694	-1.53621
FBgn0025821	-1.36777
FBgn0024921	-2.30201
FBgn0261612	-4.77517
FBgn0264272	-3.46881
FBgn0043884	-3.17189
FBgn0053530	-2.95299
FBgn0037099	-2.35188
FBgn0037936	-0.44686
FBgn0050339	-2.58571
FBgn0040763	-1.02201
FBgn0052283	-1.24015
FBgn0259226	-4.35875
FBgn0031267	-1.59671
FBgn0034304	-3.02198
FBgn0028953	-2.05829
FBgn0051128	-0.67162
FBgn0039612	-2.13055
FBgn0085417	-6.15021
FBgn0040283	-2.74207
FBgn0037406	-5.74082
FBgn0033528	-2.72547
FBgn0034817	-3.20171
FBgn0004414	-3.38443
FBgn0038797	-0.68641
FBgn0052719	-1.32261
FBgn0052227	-3.81157
FBgn0036922	-2.74149
FBgn0022343	-3.27942
FBgn0035756	-6.11279
FBgn0034323	-3.95299
FBgn0043002	-1.54347
FBgn0028948	-2.1367
FBgn0038118	-2.15406
FBgn0053771	-5.7815
FBgn0035427	-1.5287
FBgn0000037	-2.9306
FBgn0037313	-3.46259
FBgn0031313	-1.59706
FBgn0038235	-4.13289
FBgn0050293	-0.89988
FBgn0263048	-1.60845
FBgn0024277	-2.00973
FBgn0260648	-2.47345
FBgn0027083	-2.96522
FBgn0032136	-1.56777
FBgn0002563	0.79319
FBgn0033042	-1.90336
FBgn0032483	-1.59192
FBgn0051245	-0.5374
FBgn0050382	-2.51161
FBgn0039172	-2.42958
FBgn0039588	-4.06082
FBgn0034437	-1.30151
FBgn0262524	-1.54095
FBgn0052191	-2.1665
FBgn0045852	-3.96985
FBgn0025700	-2.95277
FBgn0004858	-5.1213
FBgn0036691	-3.20038
FBgn0032346	-2.31775
FBgn0264707	-5.83074
FBgn0002354	-2.68687
FBgn0052718	-0.69844
FBgn0053299	-5.1088
FBgn0014029	-3.09567
FBgn0034990	-3.93744
FBgn0035420	-3.67909
FBgn0034849	-3.89668
FBgn0033340	-3.56559
FBgn0050275	-1.33214
FBgn0016126	-2.76004
FBgn0036262	-0.55535
FBgn0030928	-2.09813
FBgn0029898	-1.42302
FBgn0010894	-3.81543
FBgn0035003	-1.57377
FBgn0022338	-1.66736
FBgn0264712	-1.76758
FBgn0038246	-2.52749
FBgn0051706	-1.09369
FBgn0051437	-1.94753
FBgn0035482	-4.52417
FBgn0032870	-2.71596
FBgn0260634	-2.49492
FBgn0259736	-2.12086
FBgn0035231	-0.99594
FBgn0051869	-3.97596
FBgn0036804	-3.97098
FBgn0015477	-3.2113
FBgn0031856	-2.23977
FBgn0085380	-6.05218
FBgn0033440	-2.80601
FBgn0032407	-3.03174
FBgn0033875	-0.55095
FBgn0011668	-2.57648
FBgn0040284	-2.94375
FBgn0037163	-1.78389
FBgn0035153	-2.41958
FBgn0028663	-3.88982
FBgn0035861	-3.60472
FBgn0031707	-3.28223
FBgn0053696	-5.66273
FBgn0028916	-2.73169
FBgn0029914	-3.19311
FBgn0027885	-3.36647
FBgn0037798	-3.32655
FBgn0034933	-3.53483
FBgn0263973	-5.01066
FBgn0033538	-2.11291
FBgn0038596	-3.25994
FBgn0013733	-2.36915
FBgn0038660	-2.29096
FBgn0004169	-1.72347
FBgn0036597	-0.39751
FBgn0011676	-1.83146
FBgn0265192	-2.76955
FBgn0243514	-1.23436
FBgn0031749	-1.18436
FBgn0016797	-3.40003
FBgn0040827	-1.02456
FBgn0031335	-0.82467
FBgn0051740	-0.43743
FBgn0051658	-2.34044
FBgn0011703	-0.73528
FBgn0032419	-0.87776
FBgn0000543	-2.95579
FBgn0031637	-2.98999
FBgn0033089	-2.83424
FBgn0052240	-0.44725
FBgn0261885	-2.92687
FBgn0029006	-3.23406
FBgn0261064	-3.0367
FBgn0036996	-0.279
FBgn0036441	-0.89405
FBgn0033065	-0.29834
FBgn0032845	-3.11416
FBgn0042101	-1.69806
FBgn0054023	-6.02844
FBgn0030717	-3.53232
FBgn0038463	-2.13207
FBgn0045485	-4.96263
FBgn0052266	-1.68084
FBgn0036022	-0.59381
FBgn0033474	-3.40064
FBgn0040775	-2.71009
FBgn0039299	-0.45716
FBgn0050412	-0.90993
FBgn0031623	-1.54174
FBgn0004870	-3.87366
FBgn0004435	-2.44473
FBgn0050438	-2.34527
FBgn0036887	-3.30187
FBgn0032603	-1.63437
FBgn0033599	-3.60823
FBgn0031879	-3.28926
FBgn0034136	-2.1645
FBgn0035415	-3.22553
FBgn0028429	-2.84011
FBgn0023000	-2.60647
FBgn0039305	-2.89604
FBgn0034200	-1.78448
FBgn0019938	-2.06269
FBgn0004865	-0.46492
FBgn0030921	-2.1442
FBgn0086683	-2.82306
FBgn0054021	-0.54884
FBgn0033815	-2.86176
FBgn0264556	-6.61246
FBgn0038981	-2.48657
FBgn0020660	-3.14344
FBgn0002905	-2.54835
FBgn0034512	-0.56982
FBgn0004619	-4.11004
FBgn0036364	-1.41966
FBgn0038744	-2.77883
FBgn0085195	-0.61394
FBgn0034418	-3.34241
FBgn0032224	-3.36201
FBgn0037824	-1.4087
FBgn0050379	-4.27146
FBgn0036518	-2.45839
FBgn0037972	-2.44269
FBgn0032700	-3.58173
FBgn0053117	-0.73634
FBgn0002791	-3.46913
FBgn0004101	-2.49208
FBgn0037853	-2.15502
FBgn0035934	-4.92796
FBgn0040660	-3.1042
FBgn0031980	-4.60191
FBgn0030610	-3.03032
FBgn0263144	-2.88502
FBgn0035398	-1.7824
FBgn0003041	-2.3215
FBgn0052320	-3.3023
FBgn0051928	-1.42453
FBgn0039846	-3.20636
FBgn0002633	-2.72404
FBgn0011592	-1.57523
FBgn0036224	-3.51705
FBgn0033748	-1.62531
FBgn0031360	-3.08436
FBgn0042187	-1.31678
FBgn0038295	-5.53483
FBgn0034120	-3.42368
FBgn0026379	-3.4452
FBgn0052232	-1.52259
FBgn0039136	-3.0851
FBgn0034011	0.20073
FBgn0021776	-2.44607
FBgn0037376	-3.30643
FBgn0004237	-1.52292
FBgn0265469	-5.6381
FBgn0000121	-1.29029
FBgn0031301	-2.72537
FBgn0032899	-1.86334
FBgn0052383	-3.70651
FBgn0038641	-2.22048
FBgn0031600	-3.29237
FBgn0263934	-5.51887
FBgn0036070	-3.69376
FBgn0020633	-1.07665
FBgn0050108	-3.21411
FBgn0038160	-4.95994
FBgn0038190	-1.98353
FBgn0003386	-3.31272
FBgn0031596	-2.43706
FBgn0031546	-1.81046
FBgn0043471	-1.25763
FBgn0039385	-3.13517
FBgn0034856	-0.49439
FBgn0032935	-1.1427
FBgn0032724	-2.5826
FBgn0004593	-0.66571
FBgn0033480	-3.34051
FBgn0086350	-0.91637
FBgn0030385	-4.99263
FBgn0037305	-3.41058
FBgn0051871	-3.68557
FBgn0040324	-2.44348
FBgn0034060	-2.63873
FBgn0010309	-2.39897
FBgn0031374	-2.94464
FBgn0032312	-0.94625
FBgn0003015	-0.53036
FBgn0003435	-2.90693
FBgn0035089	-1.12674
FBgn0039712	-2.94719
FBgn0035247	-3.23963
FBgn0265001	-5.56935
FBgn0036480	-2.95881
FBgn0032067	-1.70675
FBgn0036713	-2.49452
FBgn0051320	-2.27083
FBgn0036656	-1.44536
FBgn0033363	-4.87408
FBgn0262479	-0.81629
FBgn0085410	-6.04454
FBgn0261850	-2.18357
FBgn0050147	-3.11779
FBgn0032253	-1.13502
FBgn0000413	-3.50144
FBgn0259795	-0.72771
FBgn0034825	-1.37479
FBgn0033500	-4.38534
FBgn0015222	-3.91246
FBgn0039395	-1.2869
FBgn0000261	-2.27795
FBgn0039459	-2.67208
FBgn0005640	-0.63552
FBgn0033973	-2.9092
FBgn0051427	-5.69675
FBgn0021767	-5.12532
FBgn0036093	-1.25956
FBgn0039058	-3.1428
FBgn0038250	-2.27523
FBgn0033893	-1.17397
FBgn0267363	-0.93154
FBgn0010622	-2.84871
FBgn0031484	-2.90823
FBgn0025373	-2.17834
FBgn0031609	-3.07789
FBgn0259111	-2.96443
FBgn0032470	-4.30643
FBgn0032337	-4.50112
FBgn0039622	-2.679
FBgn0033730	-1.6515
FBgn0033649	-2.78488
FBgn0033292	-1.90142
FBgn0003891	-2.96162
FBgn0086912	-1.87625
FBgn0039342	-1.25918
FBgn0035181	-2.77982
FBgn0039495	-1.99235
FBgn0031763	-5.29562
FBgn0053110	-1.33108
FBgn0052133	-3.40538
FBgn0035414	-2.09486
FBgn0038123	-1.23206
FBgn0013751	-2.98211
FBgn0037829	-1.95495
FBgn0037107	-3.2184
FBgn0011745	-3.31158
FBgn0036146	-1.32482
FBgn0004360	-3.42074
FBgn0011207	-3.12822
FBgn0035533	-2.50063
FBgn0010052	-1.58355
FBgn0034489	-2.45538
FBgn0000639	-0.23063
FBgn0052071	-1.30997
FBgn0036606	-1.38749
FBgn0034988	-2.36379
FBgn0027528	-2.64747
FBgn0036789	-6.52749
FBgn0037460	-0.4831
FBgn0262029	-4.00139
FBgn0016756	-3.01742
FBgn0003267	-4.97392
FBgn0001138	-2.2875
FBgn0052301	-1.51276
FBgn0001258	-0.73576
FBgn0051077	-3.17449
FBgn0043530	-2.14778
FBgn0263278	-2.97426
FBgn0031585	-1.45364
FBgn0030699	-2.81178
FBgn0033826	-1.21625
FBgn0028518	-2.70501
FBgn0011289	-3.53216
FBgn0033929	-2.70294
FBgn0051145	-4.43628
FBgn0004623	-2.1935
FBgn0050372	-2.56995
FBgn0032069	0.54084
FBgn0051760	-3.1623
FBgn0037672	-1.46339
FBgn0039559	-2.74894
FBgn0004597	-2.70444
FBgn0052026	-1.08847
FBgn0036198	-3.01101
FBgn0013469	-2.2041
FBgn0260860	-2.74342
FBgn0264253	-2.28125
FBgn0035825	-4.39897
FBgn0085434	-4.71331
FBgn0034904	-1.74584
FBgn0016032	-1.95803
FBgn0038968	-1.77265
FBgn0033633	-3.65236
FBgn0031675	-3.69956
FBgn0010220	-2.51986
FBgn0051523	-2.26604
FBgn0260660	-3.4369
FBgn0261283	-3.04109
FBgn0003118	-1.1024
FBgn0034950	-2.72404
FBgn0035464	-2.73783
FBgn0003479	-3.08743
FBgn0028965	-3.76768
FBgn0039349	-2.4027
FBgn0259714	-5.14918
FBgn0039804	-1.45827
FBgn0083951	-2.44945
FBgn0034670	-1.06664
FBgn0015025	-3.61017
FBgn0037467	-3.55334
FBgn0021814	-3.86397
FBgn0004914	-2.80118
FBgn0044048	-1.06468
FBgn0058196	-3.55249
FBgn0050101	-1.81934
FBgn0035917	-2.45348
FBgn0032549	-1.38541
FBgn0039809	-2.83064
FBgn0039645	-4.58485
FBgn0037020	-2.17
FBgn0036046	-2.25863
FBgn0033086	-3.03919
FBgn0039719	-1.11832
FBgn0031449	-2.05901
FBgn0063923	-3.83444
FBgn0039006	-1.61409
FBgn0031257	-1.9664
FBgn0039656	-2.58563
FBgn0011276	-4.20983
FBgn0034103	-3.8396
FBgn0052532	-5.20983
FBgn0033863	-1.35163
FBgn0033578	-4.19179
FBgn0033507	-2.46148
FBgn0000140	-1.74255
FBgn0041249	-3.49525
FBgn0015621	-3.0095
FBgn0034237	-3.93434
FBgn0032512	-3.28153
FBgn0027584	0.93753
FBgn0003651	-4.52384
FBgn0037617	-3.54103
FBgn0052023	-1.38851
FBgn0031696	-3.66292
FBgn0264296	-1.97353
FBgn0263234	-1.9355
FBgn0039638	-2.09486
FBgn0022987	-2.46857
FBgn0041624	-4.17371
FBgn0034957	-2.05919
FBgn0035421	-3.45214
FBgn0030566	-2.76102
FBgn0050385	-2.30772
FBgn0036545	-2.50586
FBgn0027617	-3.01508
FBgn0036729	-2.22979
FBgn0034636	-1.58273
FBgn0036868	-2.71795
FBgn0037432	-1.51895
FBgn0035865	-2.65717
FBgn0039754	-1.94453
FBgn0264000	-6.04073
FBgn0035164	-3.41396
FBgn0034172	-3.03872
FBgn0034141	-3.44552
FBgn0032476	-3.13708
FBgn0025827	-2.48608
FBgn0050394	-2.89089
FBgn0034442	-3.52849
FBgn0026396	-6.30016
FBgn0010786	-2.75088
FBgn0037162	-5.91702
FBgn0263289	-4.1334
FBgn0061492	-1.69176
FBgn0034664	-1.19839
FBgn0050018	-5.19179
FBgn0039029	-1.26088
FBgn0031858	-2.32056
FBgn0033051	-1.86334
FBgn0039300	-4.78548
FBgn0052202	-2.36275
FBgn0261984	-3.64638
FBgn0040658	-4.03009
FBgn0026196	-1.42279
FBgn0051673	-2.20317
FBgn0046301	-3.10992
FBgn0035359	-1.49842
FBgn0034774	-1.29113
FBgn0037517	-1.64553
FBgn0034900	-1.12901
FBgn0041233	-5.34461
FBgn0041723	-2.66447
FBgn0034869	-3.82092
FBgn0033516	-6.08216
FBgn0261787	-3.34931
FBgn0000547	-3.20716
FBgn0035665	-1.06764
FBgn0024188	-3.27369
FBgn0036298	-3.00243
FBgn0266411	-4.53416
FBgn0033294	-0.06368
FBgn0036938	-2.21766
FBgn0037454	-0.6527
FBgn0020617	-4.03884
FBgn0037174	-2.4911
FBgn0041096	-2.52467
FBgn0261363	-1.71478
FBgn0003034	-3.25456
FBgn0035976	-2.62087
FBgn0041164	-2.75234
FBgn0034086	-4.13797
FBgn0028494	-2.07917
FBgn0004556	-2.09807
FBgn0051776	-2.52077
FBgn0036405	-3.20689
FBgn0034837	-0.79598
FBgn0038829	-3.08914
FBgn0015320	-2.77034
FBgn0036416	-0.01224
FBgn0086856	-2.65308
FBgn0039647	-2.48576
FBgn0035737	-1.42923
FBgn0026316	-3.55199
FBgn0261873	-6.32655
FBgn0050493	-2.55741
FBgn0028704	-3.68761
FBgn0034720	-1.54603
FBgn0003701	-1.51643
FBgn0031317	-2.03635
FBgn0039200	-2.87356
FBgn0015393	-1.34271
FBgn0022069	-1.66132
FBgn0032341	-2.33497
FBgn0029113	-2.33905
FBgn0036861	-3.13176
FBgn0032752	-2.40263
FBgn0034725	-2.67577
FBgn0033031	-0.47327
FBgn0028893	-0.56826
FBgn0085425	-3.87705
FBgn0000492	-1.58048
FBgn0033918	-3.49119
FBgn0036153	-2.17906
FBgn0035050	-3.71748
FBgn0020304	-1.72323
FBgn0035608	-1.16291
FBgn0028688	-2.74362
FBgn0040801	-2.68233
FBgn0033554	-2.8133
FBgn0050288	-2.95199
FBgn0033155	-2.53316
FBgn0035848	-3.26507
FBgn0262716	-3.13632
FBgn0001148	-3.97596
FBgn0263598	-3.13911
FBgn0037926	-2.27502
FBgn0004430	-0.75923
FBgn0027843	-1.10339
FBgn0033203	-0.46628
FBgn0038504	-1.64855
FBgn0038353	-0.43349
FBgn0032873	-2.90056
FBgn0036684	-2.14267
FBgn0033484	-1.73236
FBgn0053139	-3.33716
FBgn0250843	-2.39199
FBgn0053200	-2.52284
FBgn0085395	-4.86691
FBgn0035691	-3.28405
FBgn0039015	-2.97426
FBgn0024273	-3.92445
FBgn0037994	-1.16265
FBgn0032824	-0.92881
FBgn0032789	-0.99873
FBgn0051633	-1.68302
FBgn0016054	-2.34139
FBgn0020641	-1.88252
FBgn0039336	-3.50602
FBgn0026630	-2.72033
FBgn0261808	-1.88273
FBgn0035594	-4.4344
FBgn0032246	-3.12557
FBgn0035789	-1.95031
FBgn0050356	-1.02441
FBgn0051183	-4.15508
FBgn0032713	-1.18479
FBgn0003415	-2.74536
FBgn0263773	-1.09557
FBgn0086655	-4.23923
FBgn0038795	-1.38688
FBgn0034093	-3.09468
FBgn0267365	-3.25071
FBgn0051220	-3.20277
FBgn0086253	-2.0117
FBgn0263113	-4.66969
FBgn0259704	-3.68427
FBgn0035138	-1.33534
FBgn0027343	-3.20636
FBgn0033038	-2.86765
FBgn0026722	-3.27593
FBgn0037708	-3.59667
FBgn0261988	-2.28258
FBgn0016675	-1.45922
FBgn0038281	-0.66479
FBgn0033734	-2.94175
FBgn0261802	-3.9118
FBgn0040064	-2.7668
FBgn0031883	-3.23759
FBgn0037481	-2.49565
FBgn0036483	-2.88417
FBgn0013755	-2.489
FBgn0031323	-0.27554
FBgn0014343	-3.05373
FBgn0266432	-2.762
FBgn0034479	-0.51204
FBgn0053329	-1.90731
FBgn0050456	-2.31065
FBgn0038575	-0.95579
FBgn0027552	-2.22135
FBgn0043534	-2.71643
FBgn0035627	-1.91566
FBgn0259977	-1.6685
FBgn0046880	-2.84259
FBgn0261860	-3.7152
FBgn0000320	-2.49981
FBgn0035857	-1.41438
FBgn0038839	-1.40335
FBgn0029501	-1.71985
FBgn0039288	-3.75477
FBgn0029508	-2.13898
FBgn0031424	-5.43534
FBgn0038126	-0.91803
FBgn0033686	-2.86575
FBgn0004197	-2.53107
FBgn0037619	-3.67521
FBgn0026238	-2.66209
FBgn0043575	-0.94486
FBgn0053556	-5.57759
FBgn0038197	-2.50447
FBgn0050103	-1.81117
FBgn0266720	-3.13835
FBgn0085277	-3.54878
FBgn0001324	-4.37183
FBgn0051231	-0.94608
FBgn0033067	-1.50972
FBgn0002466	-1.7109
FBgn0034504	-2.98633
FBgn0250823	-3.30216
FBgn0035906	-3.37542
FBgn0039086	-3.14407
FBgn0030509	-1.84394
FBgn0037102	-2.93832
FBgn0001180	-2.16858
FBgn0000404	-0.75655
FBgn0052105	-4.90833
FBgn0032536	-1.89229
FBgn0051698	-0.10251
FBgn0020388	-2.56209
FBgn0000289	-3.22688
FBgn0037877	-2.59667
FBgn0000500	-3.43207
FBgn0033872	-2.10464
FBgn0039654	-4.52118
FBgn0001174	-1.86197
FBgn0032553	-1.18689
FBgn0034568	-5.14356
FBgn0264490	-3.37153
FBgn0032447	-3.28644
FBgn0267385	-2.58953
FBgn0025724	-3.29124
FBgn0041607	-1.30415
FBgn0032085	-2.04275
FBgn0031861	-1.00188
FBgn0029736	-3.52433
FBgn0010313	-2.4515
FBgn0039240	-3.25525
FBgn0037931	-3.58001
FBgn0033186	-2.6905
FBgn0034175	-1.51037
FBgn0005619	-1.4478
FBgn0262566	-0.20871
FBgn0033028	-3.70972
FBgn0011836	-2.66868
FBgn0037493	-5.92052
FBgn0267728	-3.6826
FBgn0261238	-2.94342
FBgn0050095	-5.78071
FBgn0034821	-5.16773
FBgn0034580	-2.03404
FBgn0039626	-3.15508
FBgn0035452	-1.14918
FBgn0038946	-2.54785
FBgn0037421	-4.48132
FBgn0051453	-1.26403
FBgn0085325	0.04182
FBgn0051213	-2.00012
FBgn0037677	-0.22304
FBgn0004053	-3.12281
FBgn0033844	-3.05397
FBgn0027082	-3.60718
FBgn0039215	-3.11616
FBgn0259175	-4.75049
FBgn0036165	-2.41388
FBgn0029940	-0.61328
FBgn0031894	-2.42159
FBgn0000115	-3.79566
FBgn0011296	-1.93346
FBgn0031129	-1.26254
FBgn0028484	-3.22796
FBgn0038387	-3.12117
FBgn0036498	-1.86386
FBgn0035280	-1.92972
FBgn0036853	-2.79076
FBgn0033274	-2.19449
FBgn0085293	-1.36119
FBgn0260011	-1.76288
FBgn0034075	-2.63218
FBgn0029789	-3.35152
FBgn0028941	-1.7117
FBgn0039780	-3.60489
FBgn0011695	-0.85105
FBgn0010620	-3.28659
FBgn0038186	-1.23606
FBgn0034658	-1.46945
FBgn0001168	-1.58519
FBgn0037578	-3.46069
FBgn0035016	-2.346
FBgn0040475	-2.8328
FBgn0038211	-2.75399
FBgn0035526	-3.39426
FBgn0035694	-2.52226
FBgn0027532	-2.76004
FBgn0250832	-1.71487
FBgn0032803	-1.99493
FBgn0036975	-0.85137
FBgn0020497	-2.50832
FBgn0028560	-0.7816
FBgn0061198	-2.67392
FBgn0039042	-4.81888
FBgn0034025	-2.25037
FBgn0039470	-0.4224
FBgn0038151	-2.26722
FBgn0037384	-2.97404
FBgn0032964	-2.37699
FBgn0020508	-0.84682
FBgn0034882	-1.38067
FBgn0022740	-3.98599
FBgn0037399	-4.7665
FBgn0032506	-4.24824
FBgn0033602	-1.52292
FBgn0085408	-6.03789
FBgn0036583	-5.62593
FBgn0052195	-0.44691
FBgn0259143	-4.54962
FBgn0037040	-2.89991
FBgn0039928	-2.77339
FBgn0035921	-3.85058
FBgn0260441	-4.45736
FBgn0052119	-1.55971
FBgn0041250	-5.38866
FBgn0039325	-0.96339
FBgn0051797	-1.99954
FBgn0034545	-2.81127
FBgn0037571	-1.65308
FBgn0032218	-2.2503
FBgn0260049	-2.87292
FBgn0033404	-6.1218
FBgn0033165	-4.34081
FBgn0036836	-3.05877
FBgn0037636	-2.63514
FBgn0037778	-3.39426
FBgn0031240	-0.76266
FBgn0005695	-1.97659
FBgn0086357	-2.70915
FBgn0039479	-4.15946
FBgn0259237	-1.84177
FBgn0036761	-2.73466
FBgn0002573	-2.86491
FBgn0036126	-2.24141
FBgn0003065	-1.71094
FBgn0038473	-2.37632
FBgn0051849	-2.72194
FBgn0040794	-3.35653
FBgn0266442	-3.47073
FBgn0000057	-3.54625
FBgn0004374	-2.43082
FBgn0033981	-1.20586
FBgn0034032	-2.41212
FBgn0028523	-1.96061
FBgn0037012	-0.97016
FBgn0025864	-2.23576
FBgn0035551	-1.24431
FBgn0035332	-2.61087
FBgn0034718	-1.73001
FBgn0029662	-3.13315
FBgn0037084	-3.12961
FBgn0038930	-0.93335
FBgn0037978	-2.58217
FBgn0016036	-4.77754
FBgn0052461	-1.35487
FBgn0034422	-2.47875
FBgn0036875	-1.15586
FBgn0015805	-1.95954
FBgn0031364	-1.78066
FBgn0028692	-3.099
FBgn0034503	-3.24852
FBgn0031520	-1.86486
FBgn0037963	-2.01264
FBgn0039504	-2.04079
FBgn0036986	-2.84923
FBgn0001197	-2.40545
FBgn0050184	-2.55292
FBgn0030417	-5.4069
FBgn0086785	-2.90758
FBgn0038055	-2.35513
FBgn0051546	-0.94197
FBgn0036024	-0.60075
FBgn0036563	-0.94733
FBgn0039868	-1.85972
FBgn0022027	-3.7152
FBgn0032123	-2.15149
FBgn0036844	-2.27174
FBgn0036678	-4.00162
FBgn0262123	-1.71132
FBgn0261524	-2.9939
FBgn0015838	-2.10073
FBgn0036826	-2.60182
FBgn0030196	-2.68196
FBgn0039421	-1.04463
FBgn0039437	-1.50812
FBgn0034068	-3.02456
FBgn0033129	-2.13296
FBgn0038360	-3.45577
FBgn0033308	-1.56324
FBgn0034528	-2.31294
FBgn0010333	-2.72423
FBgn0260006	-3.98211
FBgn0027598	-3.81827
FBgn0261602	-4.51854
FBgn0036080	-4.30557
FBgn0034327	-1.57304
FBgn0030623	-2.04656
FBgn0037716	-3.80874
FBgn0039106	-4.63415
FBgn0029949	-1.28842
FBgn0052350	-2.29025
FBgn0041342	-2.94653
FBgn0037165	-3.05805
FBgn0033794	-1.85642
FBgn0038765	-2.89432
FBgn0040529	-3.56713
FBgn0262104	-1.90925
FBgn0031282	-2.67227
FBgn0052437	-0.44756
FBgn0034683	-5.61246
FBgn0019644	-3.33526
FBgn0024944	-4.41488
FBgn0039833	-4.68372
FBgn0038449	-1.60713
FBgn0030997	-2.97835
FBgn0034942	-4.57828
FBgn0032702	-2.72958
FBgn0005596	-3.11816
FBgn0037734	-2.50783
FBgn0052039	-2.489
FBgn0038540	-2.98713
FBgn0026593	-2.23902
FBgn0053123	-2.41158
FBgn0032900	-2.20231
FBgn0028567	-0.40755
FBgn0035686	-5.75867
FBgn0028410	-2.9117
FBgn0010113	-2.69965
FBgn0035965	-3.80551
FBgn0001987	-1.65213
FBgn0036396	-2.38745
FBgn0039065	-2.5745
FBgn0050156	-1.36647
FBgn0039752	-0.6957
FBgn0030595	-1.59911
FBgn0037395	-3.06939
FBgn0051515	-3.3626
FBgn0038818	-2.53016
FBgn0034426	-3.93854
FBgn0032744	-1.74846
FBgn0263006	-2.7313
FBgn0035021	-4.10905
FBgn0037502	-1.16114
FBgn0039269	-2.90909
FBgn0012036	-1.01188
FBgn0020910	-3.96241
FBgn0262476	-2.77251
FBgn0005649	-3.11704
FBgn0039449	-1.49985
FBgn0036710	-2.37752
FBgn0035060	-3.7337
FBgn0034968	-3.28335
FBgn0033624	-3.37932
FBgn0031774	-3.09222
FBgn0020908	-2.48261
FBgn0036309	-2.83228
FBgn0031913	-1.6163
FBgn0031008	-2.6144
FBgn0036493	-4.11929
FBgn0035316	-1.39407
FBgn0032857	-3.37842
FBgn0037323	-1.45079
FBgn0031235	-1.09348
FBgn0261999	-3.36038
FBgn0035064	-2.92665
FBgn0034797	-1.35638
FBgn0032658	-2.01864
FBgn0030791	-3.39426
FBgn0000108	-2.53241
FBgn0261584	-2.492
FBgn0034110	-2.86723
FBgn0032394	-2.38632
FBgn0039192	-4.17579
FBgn0010280	-3.30016
FBgn0025678	-2.31423
FBgn0025381	-4.10681
FBgn0266569	-1.71151
FBgn0085413	-6.32077
FBgn0002789	-1.71506
FBgn0035256	-5.01812
FBgn0262541	-4.23514
FBgn0013348	-2.21384
FBgn0039663	-3.37393
FBgn0004839	-2.67171
FBgn0013725	-2.03404
FBgn0050360	-0.44191
FBgn0052277	-3.10631
FBgn0053346	0.16714
FBgn0036821	-1.60257
FBgn0001220	-2.62229
FBgn0261278	-2.90228
FBgn0036570	-2.79977
FBgn0032079	-2.3238
FBgn0032860	-3.70953
FBgn0026869	-2.90682
FBgn0037126	-0.81738
FBgn0036109	-1.32081
FBgn0086265	-1.94719
FBgn0053993	-4.79867
FBgn0051296	-1.3548
FBgn0038549	-2.05763
FBgn0035870	-3.26784
FBgn0037445	-2.4027
FBgn0264488	-2.97143
FBgn0034402	-2.89486
FBgn0010453	-3.90314
FBgn0265174	-3.18797
FBgn0015038	-1.22324
FBgn0026326	-2.48108
FBgn0032748	-2.50553
FBgn0030576	-1.68585
FBgn0037883	-3.28167
FBgn0031646	-1.85601
FBgn0029992	-4.17684
FBgn0265264	-2.82634
FBgn0031866	-4.26479
FBgn0266758	-2.36684
FBgn0003090	-2.64323
FBgn0051249	-2.67457
FBgn0036629	-3.07607
FBgn0033933	-2.21699
FBgn0033900	-3.08964
FBgn0010768	-2.18587
FBgn0032924	-2.30793
FBgn0001990	-2.96432
FBgn0001341	-2.45989
FBgn0035955	-1.66082
FBgn0035790	-4.38413
FBgn0029175	-2.62264
FBgn0000014	-2.67752
FBgn0038523	0.38791
FBgn0051778	-1.65594
FBgn0012051	-2.57587
FBgn0033208	-2.73841
FBgn0003175	-3.34476
FBgn0032034	-2.94619
FBgn0039165	-2.74826
FBgn0028400	-2.0517
FBgn0035405	-2.61706
FBgn0036008	-2.24893
FBgn0085466	-2.34381
FBgn0031471	-2.28076
FBgn0029131	-3.1715
FBgn0038349	-1.76464
FBgn0030703	-3.77103
FBgn0015380	-1.96584
FBgn0053978	-3.15624
FBgn0035544	-1.66009
FBgn0004171	-1.09844
FBgn0035879	-3.00775
FBgn0032850	-1.65417
FBgn0052099	-3.25608
FBgn0031959	-1.61927
FBgn0038208	-1.02629
FBgn0034382	-0.98328
FBgn0039744	-2.54221
FBgn0004779	-2.11629
FBgn0034624	-1.79857
FBgn0050159	-3.11117
FBgn0040814	-1.50112
FBgn0039016	-2.66328
FBgn0004898	-4.11904
FBgn0022959	-3.65091
FBgn0039480	-1.52637
FBgn0004174	-0.97943
FBgn0031713	-2.72958
FBgn0000061	-4.12633
FBgn0052243	-1.75584
FBgn0010385	0.2655
FBgn0040508	-1.12513
FBgn0051005	-2.78986
FBgn0039599	-4.33759
FBgn0003278	-2.28237
FBgn0036232	-1.67484
FBgn0028514	-1.52554
FBgn0035308	-2.4946
FBgn0039642	-2.83095
FBgn0262030	-0.63015
FBgn0053061	-1.40878
FBgn0033697	-2.36327
FBgn0020510	-3.20437
FBgn0052187	-3.26202
FBgn0039038	-3.51079
FBgn0032233	-2.40874
FBgn0052364	-0.50199
FBgn0011581	-2.18252
FBgn0030766	-1.84156
FBgn0032194	-2.51779
FBgn0036847	-2.57493
FBgn0036369	-1.91501
FBgn0030066	-3.60647
FBgn0050291	-2.4835
FBgn0264694	-3.2547
FBgn0086681	-0.99977
FBgn0034329	0.67806
FBgn0026077	-1.50512
FBgn0036741	-1.98971
FBgn0028533	-0.57244
FBgn0052281	-3.37064
FBgn0263599	-2.14337
FBgn0041240	-6.30016
FBgn0025612	-1.52462
FBgn0265595	-6.51556
FBgn0036595	-2.89079
FBgn0028903	-0.80564
FBgn0033401	-3.58953
FBgn0033720	-2.42252
FBgn0051680	-3.5733
FBgn0036019	-4.62344
FBgn0029091	-2.55529
FBgn0039223	-1.86113
FBgn0035237	-3.94076
FBgn0028579	-2.86376
FBgn0052073	-0.68694
FBgn0051561	-4.12105
FBgn0034887	-2.23916
FBgn0003391	-2.90682
FBgn0054010	-3.62398
FBgn0039031	-2.66979
FBgn0033760	-1.52866
FBgn0035999	-1.73504
FBgn0264750	-1.90476
FBgn0036052	-3.97188
FBgn0011666	-1.85878
FBgn0030668	-2.10401
FBgn0036662	-3.04537
FBgn0042180	-1.69848
FBgn0067102	-3.64422
FBgn0033980	-0.46863
FBgn0040797	-1.84254
FBgn0035957	-1.88486
FBgn0031836	-2.31955
FBgn0051538	-0.0621
FBgn0031652	-3.71407
FBgn0033301	-1.00144
FBgn0032197	-2.29832
FBgn0262617	-4.15998
FBgn0003978	-2.51449
FBgn0031942	-1.00883
FBgn0036924	-2.44544
FBgn0014870	-2.36907
FBgn0011336	-3.26396
FBgn0038244	-3.47281
FBgn0037714	-0.66813
FBgn0037697	-1.85381
FBgn0038139	-2.6631
FBgn0033911	-3.61883
FBgn0260874	-1.17351
FBgn0034802	-3.12633
FBgn0031277	0.33693
FBgn0051816	-0.1071
FBgn0243486	-1.02703
FBgn0036437	-0.9972
FBgn0259221	-3.63308
FBgn0024194	-3.13302
FBgn0053051	-2.57038
FBgn0039561	-2.76886
FBgn0052846	-2.29392
FBgn0050277	-2.78279
FBgn0036538	-1.77142
FBgn0039577	-1.14184
FBgn0037949	-3.21571
FBgn0037626	-1.6291
FBgn0066114	-3.35491
FBgn0243516	-1.85763
FBgn0033518	0.17761
FBgn0053017	-1.73735
FBgn0038376	-2.70209
FBgn0035484	-1.01144
FBgn0032798	-2.54751
FBgn0265487	-4.23569
FBgn0033651	-6.00601
FBgn0051708	-4.50701
FBgn0037755	-2.76356
FBgn0037846	-2.28532
FBgn0260632	-2.76926
FBgn0032144	-1.14576
FBgn0039522	-5.31559
FBgn0262736	-3.94164
FBgn0000575	-2.25739
FBgn0031937	-1.81832
FBgn0024491	-1.93154
FBgn0028562	-1.48669
FBgn0001202	-3.42337
FBgn0032415	-1.47738
FBgn0052029	-1.11207
FBgn0032161	-1.99309
FBgn0035644	-2.06046
FBgn0265576	-0.84438
FBgn0031729	-1.59135
FBgn0039735	-2.11685
FBgn0033297	-0.44792
FBgn0040007	-4.79306
FBgn0034480	0.54292
FBgn0032677	-1.43413
FBgn0027057	-3.78548
FBgn0032481	-2.34432
FBgn0034711	-2.00289
FBgn0033969	-0.93255
FBgn0004167	-2.27153
FBgn0028644	-5.73543
FBgn0003129	-5.73082
FBgn0037826	-1.06281
FBgn0031512	-0.37181
FBgn0035033	-1.8511
FBgn0029974	-4.6206
FBgn0021795	-3.05865
FBgn0034045	-2.50185
FBgn0039053	-1.82808
FBgn0022238	-3.06721
FBgn0035872	-2.52999
FBgn0039863	-2.57699
FBgn0037141	-0.77093
FBgn0037802	-2.38466
FBgn0035196	-0.92555
FBgn0000451	-2.57501
FBgn0025681	-3.54103
FBgn0025693	-2.93115
FBgn0038569	-3.67595
FBgn0043455	-2.99194
FBgn0046888	-3.58053
FBgn0267327	-2.64665
FBgn0033326	-3.04501
FBgn0265784	-4.14509
FBgn0263971	-2.1858
FBgn0038961	-2.9559
FBgn0026566	-2.92008
FBgn0039002	-2.5673
FBgn0035802	-6.1088
FBgn0035229	-3.02585
FBgn0004143	-2.77952
FBgn0033250	-1.74468
FBgn0035124	-1.04513
FBgn0032057	-4.63846
FBgn0003377	-0.17597
FBgn0039897	-2.95154
FBgn0001086	-1.33101
FBgn0082598	-3.13517
FBgn0039970	-2.56388
FBgn0040281	-2.74555
FBgn0030091	-3.57725
FBgn0032231	-2.95579
FBgn0000227	-1.97886
FBgn0039936	-3.33876
FBgn0032535	-3.07461
FBgn0040569	-5.56798
FBgn0034734	-2.11235
FBgn0032090	-1.14723
FBgn0052413	-6.01905
FBgn0010638	-2.98245
FBgn0021995	-2.40438
FBgn0039532	-2.21297
FBgn0033072	-4.47201
FBgn0032452	-3.32063
FBgn0259984	-1.90991
FBgn0033347	-3.22162
FBgn0032371	-0.46835
FBgn0035581	-3.93104
FBgn0262601	-2.07814
FBgn0003008	-3.24113
FBgn0259243	-4.48004
FBgn0263398	-3.67024
FBgn0259685	-2.41304
FBgn0260932	-2.7824
FBgn0260486	-2.87504
FBgn0011656	-2.91191
FBgn0261362	-0.33739
FBgn0039593	0.14377
FBgn0040392	-3.60894
FBgn0001285	0.34692
FBgn0038145	-3.67872
FBgn0050007	-3.71066
FBgn0004406	-3.19919
FBgn0263108	-3.71123
FBgn0262352	-2.96196
FBgn0052313	-1.65385
FBgn0033755	-2.85204
FBgn0002525	-2.15053
FBgn0036381	-1.07826
FBgn0032688	-2.42771
FBgn0051860	-1.82128
FBgn0261976	-2.30073
FBgn0051119	-4.47586
FBgn0033110	-4.87578
FBgn0020414	-2.13517
FBgn0266100	-6.35934
FBgn0011259	-2.47337
FBgn0001296	-1.96184
FBgn0036497	-0.67165
FBgn0051809	-0.63167
FBgn0036486	-1.16738
FBgn0013433	-3.05313
FBgn0037060	-3.51128
FBgn0036768	-1.79541
FBgn0036889	-2.32836
FBgn0032524	-2.81624
FBgn0028963	-4.46977
FBgn0037428	-1.92287
FBgn0032236	-3.72337
FBgn0037090	-0.80334
FBgn0035763	-2.9317
FBgn0032879	-2.76415
FBgn0014023	-2.53107
FBgn0032643	-2.63971
FBgn0028569	-1.54406
FBgn0035674	-2.4924
FBgn0085382	-6.54894
FBgn0046706	-2.08571
FBgn0036620	-1.55368
FBgn0004516	-2.25711
FBgn0052373	-1.81817
FBgn0010909	-1.96646
FBgn0038892	-1.34582
FBgn0259722	-3.35122
FBgn0015031	-3.63523
FBgn0037645	-5.42787
FBgn0037022	-3.85893
FBgn0032116	-2.49769
FBgn0036318	-3.41858
FBgn0034181	-3.41365
FBgn0036010	-6.57484
FBgn0035094	-2.57932
FBgn0261822	-3.05421
FBgn0262854	-1.77443
FBgn0061515	-3.13163
FBgn0033752	-3.62683
FBgn0002945	-2.19734
FBgn0036947	-1.82062
FBgn0031544	-3.55148
FBgn0000045	-2.69106
FBgn0052179	-3.90682
FBgn0052230	-4.67816
FBgn0054005	-2.42121
FBgn0000551	-3.49492
FBgn0035134	-4.70125
FBgn0005771	-1.4314
FBgn0036512	-3.65036
FBgn0031724	-1.26948
FBgn0052161	-0.54298
FBgn0265413	-3.36068
FBgn0051729	-3.50914
FBgn0052343	-2.73947
FBgn0033459	-1.96793
FBgn0004591	-0.25599
FBgn0034197	-1.06293
FBgn0020261	-3.63379
FBgn0038811	-2.60393
FBgn0033174	-2.6092
FBgn0029152	-2.25229
FBgn0031232	-2.96815
FBgn0023495	-0.09466
FBgn0036451	-3.22203
FBgn0011202	-1.50545
FBgn0003460	-3.70614
FBgn0003130	-4.45609
FBgn0263930	-1.90099
FBgn0052040	-3.14165
FBgn0035444	-2.84581
FBgn0037690	-4.02233
FBgn0031905	-1.81188
FBgn0260459	-0.68511
FBgn0033769	-1.03404
FBgn0000565	-1.18115
FBgn0037351	-4.16981
FBgn0028858	-1.36056
FBgn0036286	-4.14688
FBgn0031413	-3.63308
FBgn0033987	-2.58217
FBgn0260968	-2.62487
FBgn0020386	-2.5541
[truncated: 7,515 more rows]

## Sheet: Worm
Gene-ID	GFP
WBGene00022822	3.70271
WBGene00007458	3.64835
WBGene00008377	3.5734
WBGene00022820	3.50175
WBGene00013393	3.47674
WBGene00006925	3.42662
WBGene00006929	3.42399
WBGene00007459	3.41452
WBGene00003449	3.27079
WBGene00003444	3.25105
WBGene00000613	3.22255
WBGene00013867	3.20875
WBGene00010084	3.17026
WBGene00013394	3.17024
WBGene00012878	3.16769
WBGene00009684	3.16246
WBGene00003431	3.14742
WBGene00003468	3.14552
WBGene00003452	3.13974
WBGene00013392	3.12799
WBGene00003464	3.1219
WBGene00006926	3.10004
WBGene00043147	3.07525
WBGene00003448	3.07221
WBGene00010007	3.0655
WBGene00022821	3.05868
WBGene00003470	3.05127
WBGene00013391	3.04334
WBGene00003432	3.03216
WBGene00010065	3.01719
WBGene00002013	3.00873
WBGene00003465	3.00349
WBGene00018605	2.99433
WBGene00003450	2.98605
WBGene00008378	2.98064
WBGene00003446	2.97623
WBGene00003426	2.97059
WBGene00016636	2.96652
WBGene00017490	2.94637
WBGene00003425	2.94313
WBGene00017498	2.91679
WBGene00014117	2.91135
WBGene00012880	2.89647
WBGene00016627	2.88812
WBGene00003463	2.88716
WBGene00010399	2.88647
WBGene00019028	2.88109
WBGene00003443	2.87499
WBGene00004398	2.8721
WBGene00006930	2.86701
WBGene00003424	2.86269
WBGene00003435	2.8578
WBGene00016447	2.85214
WBGene00009898	2.81506
WBGene00008584	2.76711
WBGene00016752	2.76526
WBGene00003473	2.75487
WBGene00000851	2.75432
WBGene00003429	2.75212
WBGene00007709	2.74686
WBGene00003438	2.70944
WBGene00022760	2.70919
WBGene00016943	2.70568
WBGene00017134	2.69221
WBGene00004988	2.66875
WBGene00015605	2.66452
WBGene00000737	2.66248
WBGene00001067	2.65289
WBGene00016178	2.64776
WBGene00000659	2.6451
WBGene00003457	2.6396
WBGene00011063	2.63041
WBGene00003458	2.62729
WBGene00000731	2.6117
WBGene00011320	2.60806
WBGene00006039	2.60625
WBGene00010613	2.59751
WBGene00000751	2.58331
WBGene00010790	2.55639
WBGene00006541	2.54311
WBGene00009897	2.5365
WBGene00004078	2.51383
WBGene00009892	2.50813
WBGene00000535	2.50619
WBGene00019026	2.50452
WBGene00020881	2.49553
WBGene00003467	2.48289
WBGene00002015	2.48167
WBGene00016638	2.47995
WBGene00009221	2.47186
WBGene00015683	2.46264
WBGene00012212	2.46085
WBGene00020840	2.44525
WBGene00017386	2.44465
WBGene00002017	2.43537
WBGene00001693	2.43312
WBGene00002020	2.43122
WBGene00011979	2.42943
WBGene00000691	2.41726
WBGene00020700	2.41619
WBGene00016434	2.41462
WBGene00019016	2.40224
WBGene00001391	2.39506
WBGene00016052	2.39072
WBGene00016534	2.38397
WBGene00016017	2.38225
WBGene00009600	2.37426
WBGene00004815	2.36932
WBGene00014046	2.36395
WBGene00009692	2.36168
WBGene00022645	2.36003
WBGene00009691	2.35372
WBGene00020070	2.34691
WBGene00010124	2.34405
WBGene00010158	2.32946
WBGene00019989	2.32829
WBGene00000754	2.32561
WBGene00006047	2.31921
WBGene00016084	2.31918
WBGene00004239	2.31792
WBGene00000699	2.3173
WBGene00000622	2.29161
WBGene00008825	2.28481
WBGene00000696	2.28275
WBGene00022754	2.27839
WBGene00000749	2.27811
WBGene00013474	2.2681
WBGene00006044	2.26786
WBGene00015689	2.25774
WBGene00000665	2.2499
WBGene00009681	2.2428
WBGene00022597	2.24115
WBGene00017851	2.24099
WBGene00008649	2.22553
WBGene00018731	2.22517
WBGene00003456	2.22409
WBGene00007919	2.22139
WBGene00012213	2.20879
WBGene00009990	2.20535
WBGene00016088	2.20228
WBGene00007957	2.20161
WBGene00022751	2.20107
WBGene00000718	2.2008
WBGene00000601	2.20075
WBGene00000782	2.19271
WBGene00020905	2.19251
WBGene00000734	2.19211
WBGene00007649	2.18859
WBGene00009895	2.18408
WBGene00003442	2.18382
WBGene00001500	2.18266
WBGene00019978	2.18087
WBGene00004814	2.17645
WBGene00000667	2.1764
WBGene00000757	2.17189
WBGene00015102	2.16738
WBGene00000608	2.16711
WBGene00004397	2.16587
WBGene00001606	2.1639
WBGene00016893	2.15593
WBGene00000668	2.15328
WBGene00000555	2.14987
WBGene00000593	2.14763
WBGene00015084	2.14571
WBGene00017962	2.13969
WBGene00016082	2.13213
WBGene00012781	2.12978
WBGene00017698	2.12909
WBGene00001066	2.12357
WBGene00000681	2.12315
WBGene00000602	2.11766
WBGene00013570	2.11632
WBGene00008295	2.1122
WBGene00011460	2.10919
WBGene00012256	2.10907
WBGene00003092	2.1041
WBGene00000700	2.09988
WBGene00003462	2.09911
WBGene00015340	2.0988
WBGene00003469	2.09817
WBGene00021114	2.0834
WBGene00006057	2.08182
WBGene00011176	2.07703
WBGene00000690	2.07029
WBGene00000716	2.06961
WBGene00010633	2.06825
WBGene00003522	2.05749
WBGene00003230	2.05725
WBGene00016440	2.0572
WBGene00000713	2.05539
WBGene00007283	2.05341
WBGene00008809	2.04644
WBGene00009042	2.03983
WBGene00008059	2.03906
WBGene00017743	2.03784
WBGene00016658	2.03347
WBGene00009680	2.03065
WBGene00000693	2.02987
WBGene00020674	2.02706
WBGene00015593	2.02486
WBGene00013858	2.02281
WBGene00021035	2.02243
WBGene00020544	2.01475
WBGene00000666	2.01351
WBGene00020617	2.00871
WBGene00002012	1.99714
WBGene00000620	1.99045
WBGene00000711	1.98951
WBGene00000669	1.98888
WBGene00014047	1.98833
WBGene00018297	1.98095
WBGene00000717	1.97691
WBGene00000784	1.974
WBGene00015052	1.97188
WBGene00000989	1.96932
WBGene00001607	1.96921
WBGene00000719	1.96897
WBGene00007871	1.96819
WBGene00000756	1.96785
WBGene00008575	1.96602
WBGene00006038	1.96577
WBGene00017263	1.96452
WBGene00000781	1.96345
WBGene00017539	1.96321
WBGene00010123	1.96294
WBGene00003879	1.96089
WBGene00020948	1.95598
WBGene00020033	1.95559
WBGene00011489	1.9555
WBGene00003977	1.95483
WBGene00000694	1.95451
WBGene00018125	1.95324
WBGene00011584	1.95206
WBGene00001074	1.9454
WBGene00012020	1.94279
WBGene00000618	1.94069
WBGene00000597	1.94014
WBGene00009215	1.93373
WBGene00022884	1.9306
WBGene00007999	1.92969
WBGene00022644	1.92939
WBGene00000676	1.92853
WBGene00010196	1.9284
WBGene00012615	1.92774
WBGene00001757	1.92631
WBGene00017648	1.92161
WBGene00007365	1.92132
WBGene00020652	1.91999
WBGene00000641	1.9157
WBGene00007992	1.90548
WBGene00012557	1.90502
WBGene00004243	1.90472
WBGene00019232	1.89716
WBGene00022642	1.89569
WBGene00004994	1.89323
WBGene00000638	1.8927
WBGene00000556	1.89199
WBGene00000729	1.89065
WBGene00000753	1.88954
WBGene00017659	1.88605
WBGene00007358	1.88553
WBGene00012294	1.88395
WBGene00000727	1.88391
WBGene00004798	1.88299
WBGene00001858	1.88014
WBGene00006056	1.87854
WBGene00017200	1.87682
WBGene00004242	1.87406
WBGene00000672	1.87173
WBGene00008390	1.87112
WBGene00000785	1.86914
WBGene00009186	1.86376
WBGene00000596	1.86323
WBGene00005003	1.86293
WBGene00016217	1.86209
WBGene00000701	1.86048
WBGene00020326	1.85686
WBGene00012211	1.8536
WBGene00020040	1.84542
WBGene00003539	1.84462
WBGene00004931	1.84414
WBGene00010651	1.84112
WBGene00000636	1.84021
WBGene00009041	1.83174
WBGene00012070	1.83102
WBGene00009787	1.83045
WBGene00016119	1.82806
WBGene00010351	1.82716
WBGene00000599	1.82307
WBGene00005017	1.82281
WBGene00002026	1.81934
WBGene00011668	1.81876
WBGene00000660	1.81839
WBGene00020713	1.81746
WBGene00019811	1.80823
WBGene00000465	1.80682
WBGene00000675	1.80677
WBGene00015083	1.80597
WBGene00010555	1.80549
WBGene00011898	1.8041
WBGene00008590	1.80077
WBGene00004232	1.80032
WBGene00012783	1.79271
WBGene00013931	1.79269
WBGene00017303	1.79161
WBGene00014240	1.78979
WBGene00016058	1.78894
WBGene00003096	1.78705
WBGene00017228	1.78575
WBGene00012747	1.78344
WBGene00050875	1.77933
WBGene00010062	1.77835
WBGene00017112	1.77529
WBGene00013986	1.7748
WBGene00009773	1.7739
WBGene00009724	1.77372
WBGene00012087	1.7688
WBGene00010495	1.7587
WBGene00007875	1.75081
WBGene00019017	1.75062
WBGene00007643	1.74729
WBGene00015759	1.74636
WBGene00003231	1.74402
WBGene00009035	1.73954
WBGene00003466	1.73948
WBGene00014175	1.73905
WBGene00017484	1.73876
WBGene00009926	1.7384
WBGene00019311	1.73719
WBGene00013473	1.73573
WBGene00000616	1.73319
WBGene00000728	1.73314
WBGene00007320	1.73298
WBGene00014158	1.72879
WBGene00009142	1.72486
WBGene00018031	1.72356
WBGene00007196	1.7223
WBGene00000653	1.71987
WBGene00000707	1.71849
WBGene00019963	1.71825
WBGene00001477	1.71004
WBGene00000649	1.70929
WBGene00001395	1.70279
WBGene00004993	1.70267
WBGene00009701	1.69953
WBGene00017218	1.69921
WBGene00005832	1.69875
WBGene00008356	1.69646
WBGene00012257	1.69609
WBGene00011010	1.69135
WBGene00000213	1.68764
WBGene00020433	1.68725
WBGene00000621	1.68684
WBGene00016845	1.68305
WBGene00000752	1.68023
WBGene00000617	1.67827
WBGene00000169	1.67801
WBGene00008211	1.67776
WBGene00016361	1.67173
WBGene00008718	1.67073
WBGene00010000	1.67023
WBGene00003093	1.66734
WBGene00019791	1.66718
WBGene00008218	1.66417
WBGene00009493	1.66216
WBGene00004351	1.66209
WBGene00019495	1.66187
WBGene00013567	1.6597
WBGene00005018	1.6587
WBGene00000703	1.65799
WBGene00010368	1.65697
WBGene00008851	1.65667
WBGene00012947	1.65624
WBGene00015725	1.65523
WBGene00006956	1.65496
WBGene00009401	1.65186
WBGene00006947	1.65163
WBGene00010174	1.65102
WBGene00017815	1.64626
WBGene00006587	1.6444
WBGene00000252	1.64033
WBGene00002265	1.63984
WBGene00000606	1.63958
WBGene00001242	1.63898
WBGene00001244	1.63828
WBGene00004044	1.63821
WBGene00019563	1.63518
WBGene00007869	1.63459
WBGene00000657	1.63458
WBGene00018803	1.63408
WBGene00015672	1.63232
WBGene00007307	1.6313
WBGene00010262	1.62962
WBGene00008394	1.62816
WBGene00007714	1.62786
WBGene00012608	1.62713
WBGene00015721	1.62664
WBGene00003099	1.62619
WBGene00009982	1.62405
WBGene00016054	1.62293
WBGene00011487	1.61899
WBGene00014173	1.61718
WBGene00000730	1.61696
WBGene00000722	1.61451
WBGene00007573	1.61082
WBGene00001581	1.60895
WBGene00001070	1.60774
WBGene00006050	1.60688
WBGene00010234	1.60415
WBGene00012436	1.60313
WBGene00015312	1.60308
WBGene00000930	1.59728
WBGene00016541	1.59644
WBGene00013932	1.59513
WBGene00016675	1.59484
WBGene00016457	1.59196
WBGene00008594	1.59057
WBGene00016628	1.58932
WBGene00008536	1.58919
WBGene00011124	1.58891
WBGene00008607	1.58801
WBGene00017634	1.58765
WBGene00011534	1.58696
WBGene00003770	1.58672
WBGene00019719	1.58414
WBGene00019410	1.58285
WBGene00015720	1.58262
WBGene00005016	1.57905
WBGene00020237	1.57746
WBGene00018616	1.57691
WBGene00000628	1.57609
WBGene00009750	1.57466
WBGene00009237	1.57372
WBGene00010125	1.56867
WBGene00002259	1.56794
WBGene00003766	1.56752
WBGene00008789	1.56604
WBGene00011328	1.56363
WBGene00009959	1.56168
WBGene00013939	1.55878
WBGene00021134	1.55696
WBGene00010377	1.55605
WBGene00007872	1.55488
WBGene00017387	1.5544
WBGene00000732	1.55338
WBGene00008519	1.55336
WBGene00004300	1.55091
WBGene00002254	1.55091
WBGene00006419	1.55086
WBGene00019473	1.55032
WBGene00001387	1.54867
WBGene00009213	1.54843
WBGene00012540	1.54577
WBGene00018619	1.54491
WBGene00009988	1.54469
WBGene00020846	1.54398
WBGene00011000	1.54253
WBGene00012051	1.54227
WBGene00017841	1.53935
WBGene00008577	1.53918
WBGene00000631	1.53804
WBGene00011800	1.53767
WBGene00007958	1.53595
WBGene00004099	1.53203
WBGene00009983	1.5318
WBGene00008741	1.53154
WBGene00017114	1.52666
WBGene00014186	1.52516
WBGene00005005	1.52496
WBGene00011120	1.52213
WBGene00019368	1.52202
WBGene00022680	1.51984
WBGene00016004	1.51836
WBGene00011741	1.51388
WBGene00011841	1.51215
WBGene00016501	1.51132
WBGene00020350	1.51122
WBGene00008495	1.51023
WBGene00017542	1.50896
WBGene00016568	1.50821
WBGene00001712	1.50706
WBGene00018737	1.50602
WBGene00008393	1.5035
WBGene00006048	1.50272
WBGene00017541	1.49822
WBGene00001726	1.49809
WBGene00001076	1.49801
WBGene00014029	1.49755
WBGene00006631	1.49751
WBGene00009805	1.4961
WBGene00017455	1.49453
WBGene00003514	1.4944
WBGene00020715	1.49396
WBGene00007868	1.49248
WBGene00002260	1.49008
WBGene00004984	1.48839
WBGene00003755	1.4878
WBGene00015339	1.48705
WBGene00000704	1.48588
WBGene00018122	1.48557
WBGene00017258	1.48465
WBGene00021121	1.48323
WBGene00010424	1.48313
WBGene00003228	1.48257
WBGene00006051	1.48059
WBGene00001751	1.47962
WBGene00000692	1.47867
WBGene00006630	1.47825
WBGene00000612	1.47614
WBGene00001716	1.47419
WBGene00012047	1.47117
WBGene00012068	1.47076
WBGene00013290	1.46962
WBGene00019421	1.46899
WBGene00020243	1.46797
WBGene00007733	1.46506
WBGene00022589	1.46152
WBGene00008944	1.4614
WBGene00000614	1.46001
WBGene00012435	1.4574
WBGene00015646	1.45671
WBGene00009031	1.45648
WBGene00011321	1.45483
WBGene00015599	1.45425
WBGene00016422	1.45178
WBGene00001444	1.45151
WBGene00017307	1.45007
WBGene00000715	1.44964
WBGene00004139	1.44883
WBGene00016161	1.44592
WBGene00012746	1.44325
WBGene00011501	1.44168
WBGene00014039	1.44124
WBGene00018438	1.44095
WBGene00016612	1.44031
WBGene00003663	1.43879
WBGene00000503	1.43709
WBGene00008496	1.43622
WBGene00001065	1.43606
WBGene00007873	1.43272
WBGene00000032	1.43231
WBGene00000748	1.43154
WBGene00017229	1.42996
WBGene00016659	1.42804
WBGene00009778	1.42583
WBGene00002114	1.4255
WBGene00015348	1.42491
WBGene00001728	1.4245
WBGene00012140	1.42394
WBGene00016596	1.42215
WBGene00001069	1.42185
WBGene00007159	1.42149
WBGene00011795	1.42086
WBGene00017018	1.42071
WBGene00006394	1.41892
WBGene00004156	1.41891
WBGene00011911	1.41803
WBGene00016332	1.41738
WBGene00004742	1.40777
WBGene00019570	1.40455
WBGene00017073	1.40143
WBGene00009466	1.40132
WBGene00000136	1.40044
WBGene00019839	1.39981
WBGene00021072	1.39957
WBGene00000697	1.39703
WBGene00020035	1.39644
WBGene00020991	1.39622
WBGene00017105	1.39619
WBGene00011214	1.39598
WBGene00001633	1.39534
WBGene00020684	1.39444
WBGene00017128	1.3942
WBGene00014097	1.39241
WBGene00010745	1.39
WBGene00012261	1.38974
WBGene00015112	1.38815
WBGene00015688	1.38731
WBGene00010549	1.38719
WBGene00011537	1.38536
WBGene00020550	1.38479
WBGene00007946	1.38301
WBGene00003430	1.38241
WBGene00007278	1.38215
WBGene00009156	1.38072
WBGene00000755	1.37923
WBGene00011548	1.37776
WBGene00008313	1.37343
WBGene00001386	1.37254
WBGene00000219	1.37231
WBGene00013516	1.37068
WBGene00020587	1.37066
WBGene00017278	1.36948
WBGene00000712	1.36911
WBGene00016781	1.36802
WBGene00019404	1.36801
WBGene00009486	1.36619
WBGene00019113	1.36436
WBGene00013060	1.36339
WBGene00010904	1.36328
WBGene00009634	1.36226
WBGene00011753	1.36199
WBGene00001072	1.35759
WBGene00008625	1.3555
WBGene00003094	1.35372
WBGene00009302	1.34926
WBGene00011262	1.34801
WBGene00018645	1.34618
WBGene00009458	1.34588
WBGene00019730	1.34519
WBGene00000705	1.34352
WBGene00000866	1.34238
WBGene00003784	1.34162
WBGene00003764	1.34086
WBGene00021113	1.34041
WBGene00020872	1.33909
WBGene00008541	1.33889
WBGene00009809	1.33794
WBGene00001071	1.3353
WBGene00004971	1.33406
WBGene00009308	1.3326
WBGene00000733	1.33248
WBGene00004819	1.33053
WBGene00010263	1.33041
WBGene00006366	1.32857
WBGene00012481	1.32751
WBGene00017978	1.32646
WBGene00000609	1.32629
WBGene00010661	1.32497
WBGene00010256	1.32158
WBGene00013696	1.31943
WBGene00007331	1.31905
WBGene00000746	1.31836
WBGene00020414	1.31766
WBGene00000594	1.31694
WBGene00018808	1.31608
WBGene00007203	1.31495
WBGene00014182	1.3145
WBGene00014116	1.31333
WBGene00010290	1.31202
WBGene00013887	1.31093
WBGene00007301	1.30755
WBGene00008591	1.30396
WBGene00016670	1.30344
WBGene00003474	1.30311
WBGene00017332	1.30225
WBGene00019312	1.29961
WBGene00012018	1.29866
WBGene00020542	1.29863
WBGene00018809	1.29802
WBGene00001394	1.29387
WBGene00006408	1.29323
WBGene00013943	1.29229
WBGene00003963	1.29098
WBGene00016782	1.28953
WBGene00011536	1.28831
WBGene00012185	1.28806
WBGene00014188	1.28648
WBGene00001458	1.28546
WBGene00007565	1.284
WBGene00011235	1.28007
WBGene00013449	1.27974
WBGene00013941	1.27853
WBGene00001855	1.27681
WBGene00020940	1.27594
WBGene00019430	1.27537
WBGene00005854	1.27513
WBGene00010539	1.27357
WBGene00018138	1.27268
WBGene00008464	1.27268
WBGene00007605	1.27188
WBGene00010466	1.2715
WBGene00013297	1.26717
WBGene00014032	1.26696
WBGene00019782	1.26577
WBGene00003395	1.26401
WBGene00011006	1.26358
WBGene00001397	1.26029
WBGene00006040	1.26021
WBGene00013063	1.25984
WBGene00004996	1.25654
WBGene00043187	1.25554
WBGene00006764	1.25529
WBGene00010070	1.25479
WBGene00020071	1.25348
WBGene00000656	1.25184
WBGene00017177	1.25167
WBGene00005051	1.2493
WBGene00006418	1.24811
WBGene00010528	1.24804
WBGene00020014	1.24797
WBGene00017975	1.2462
WBGene00020509	1.24366
WBGene00018253	1.24354
WBGene00000634	1.23977
WBGene00001856	1.23776
WBGene00016894	1.23747
WBGene00003106	1.23734
WBGene00021381	1.23599
WBGene00000931	1.23582
WBGene00020592	1.23204
WBGene00019384	1.22918
WBGene00017127	1.22839
WBGene00007457	1.22733
WBGene00010874	1.22731
WBGene00014169	1.22692
WBGene00013956	1.22651
WBGene00018083	1.22637
WBGene00003767	1.22407
WBGene00010204	1.2235
WBGene00009754	1.22321
WBGene00006053	1.22163
WBGene00019136	1.22142
WBGene00001955	1.22107
WBGene00000747	1.22104
WBGene00003649	1.22039
WBGene00008205	1.21833
WBGene00001862	1.21819
WBGene00006754	1.21728
WBGene00011954	1.21666
WBGene00017839	1.21518
WBGene00009446	1.21502
WBGene00022679	1.21487
WBGene00015936	1.21337
WBGene00009339	1.21106
WBGene00008063	1.21092
WBGene00018970	1.21001
WBGene00013900	1.208
WBGene00000479	1.20744
WBGene00010285	1.20578
WBGene00008891	1.20526
WBGene00021005	1.20507
WBGene00006668	1.20417
WBGene00006915	1.20289
WBGene00009342	1.20281
WBGene00016243	1.20232
WBGene00010001	1.20205
WBGene00013130	1.19874
WBGene00016013	1.19782
WBGene00008810	1.19648
WBGene00007455	1.19608
WBGene00000558	1.19434
WBGene00017964	1.19317
WBGene00008915	1.19139
WBGene00013888	1.19109
WBGene00011535	1.19083
WBGene00015355	1.18969
WBGene00019520	1.18927
WBGene00021389	1.18907
WBGene00017666	1.1883
WBGene00012621	1.18737
WBGene00003844	1.18708
WBGene00001455	1.18534
WBGene00017267	1.18449
WBGene00010142	1.18446
WBGene00019021	1.18391
WBGene00011286	1.1831
WBGene00017154	1.18237
WBGene00001243	1.18106
WBGene00023417	1.17633
WBGene00020072	1.17354
WBGene00001703	1.17349
WBGene00007804	1.17342
WBGene00019236	1.17074
WBGene00000779	1.17061
WBGene00019617	1.17028
WBGene00014246	1.16965
WBGene00015765	1.16927
WBGene00015331	1.16924
WBGene00007239	1.16913
WBGene00020976	1.16882
WBGene00001898	1.16878
WBGene00019148	1.16794
WBGene00018245	1.16742
WBGene00008567	1.16687
WBGene00010876	1.16673
WBGene00017203	1.16629
WBGene00012383	1.16566
WBGene00006977	1.16554
WBGene00023407	1.16547
WBGene00009300	1.16388
WBGene00022621	1.16352
WBGene00015073	1.16311
WBGene00020808	1.1621
WBGene00015947	1.16081
WBGene00000688	1.16067
WBGene00000603	1.15844
WBGene00013230	1.15811
WBGene00012379	1.15455
WBGene00001077	1.15391
WBGene00007807	1.15333
WBGene00009908	1.15172
WBGene00017991	1.15035
WBGene00020803	1.14987
WBGene00000033	1.14981
WBGene00012296	1.14934
WBGene00016660	1.14912
WBGene00009431	1.14633
WBGene00002106	1.14581
WBGene00017068	1.14478
WBGene00009212	1.14454
WBGene00007836	1.14431
WBGene00001789	1.1435
WBGene00008565	1.1427
WBGene00020242	1.14264
WBGene00012844	1.1419
WBGene00010267	1.14188
WBGene00005740	1.14136
WBGene00000026	1.14071
WBGene00022886	1.14028
WBGene00010531	1.13966
WBGene00007770	1.13669
WBGene00001064	1.13663
WBGene00019798	1.13608
WBGene00020837	1.13352
WBGene00016056	1.13321
WBGene00012251	1.13294
WBGene00018694	1.13284
WBGene00021503	1.13172
WBGene00010353	1.1312
WBGene00022781	1.13017
WBGene00017509	1.1291
WBGene00019234	1.12881
WBGene00000515	1.1285
WBGene00010440	1.12822
WBGene00020302	1.12725
WBGene00013007	1.12684
WBGene00006565	1.12637
WBGene00020661	1.124
WBGene00012186	1.12269
WBGene00019879	1.12243
WBGene00015231	1.12153
WBGene00022875	1.11829
WBGene00004133	1.11796
WBGene00010469	1.11696
WBGene00009723	1.11666
WBGene00004821	1.11611
WBGene00022553	1.11582
WBGene00008492	1.11418
WBGene00003669	1.11175
WBGene00009470	1.1108
WBGene00016414	1.11005
WBGene00008229	1.10847
WBGene00002007	1.10837
WBGene00011462	1.10784
WBGene00007264	1.10758
WBGene00007792	1.10646
WBGene00015899	1.10543
WBGene00022708	1.10469
WBGene00008967	1.10454
WBGene00009938	1.10176
WBGene00019272	1.10072
WBGene00007452	1.10005
WBGene00015894	1.09926
WBGene00011284	1.09814
WBGene00021080	1.09813
WBGene00018643	1.09809
WBGene00001000	1.09552
WBGene00012313	1.09238
WBGene00000738	1.0921
WBGene00000998	1.09023
WBGene00016680	1.09009
WBGene00013854	1.09003
WBGene00018823	1.08792
WBGene00007624	1.08732
WBGene00013700	1.08572
WBGene00002271	1.0856
WBGene00000025	1.08433
WBGene00017060	1.08239
WBGene00000282	1.0823
WBGene00015781	1.0803
WBGene00018424	1.08021
WBGene00013978	1.07853
WBGene00012357	1.07811
WBGene00000673	1.07751
WBGene00011244	1.07463
WBGene00000215	1.07436
WBGene00012484	1.07428
WBGene00017579	1.07367
WBGene00012239	1.07362
WBGene00019153	1.07272
WBGene00011798	1.07234
WBGene00016549	1.07163
WBGene00008027	1.07139
WBGene00007584	1.06973
WBGene00015865	1.06947
WBGene00007082	1.06886
WBGene00016345	1.06847
WBGene00008074	1.0682
WBGene00020373	1.0677
WBGene00007131	1.06675
WBGene00004908	1.06541
WBGene00018698	1.06523
WBGene00001172	1.0647
WBGene00020058	1.06409
WBGene00003759	1.06391
WBGene00010486	1.06219
WBGene00016399	1.06148
WBGene00019406	1.06073
WBGene00008001	1.06056
WBGene00010470	1.05913
WBGene00017772	1.05891
WBGene00016164	1.05727
WBGene00019527	1.05686
WBGene00005824	1.05575
WBGene00001564	1.0555
WBGene00017838	1.05524
WBGene00019450	1.05453
WBGene00012547	1.05443
WBGene00011061	1.05381
WBGene00008535	1.05296
WBGene00004358	1.05063
WBGene00003057	1.05045
WBGene00019379	1.05007
WBGene00012605	1.0487
WBGene00016263	1.04802
WBGene00000399	1.04788
WBGene00022669	1.04783
WBGene00019619	1.0454
WBGene00011390	1.04507
WBGene00010547	1.04477
WBGene00006584	1.04344
WBGene00021731	1.0426
WBGene00009722	1.04134
WBGene00001430	1.0408
WBGene00020578	1.04053
WBGene00012879	1.04038
WBGene00020981	1.03862
WBGene00002085	1.03847
WBGene00011910	1.03842
WBGene00000868	1.03837
WBGene00008233	1.03783
WBGene00019564	1.03533
WBGene00000741	1.03463
WBGene00018563	1.03427
WBGene00010461	1.03401
WBGene00019388	1.03246
WBGene00006627	1.03198
WBGene00020865	1.03189
WBGene00001398	1.03109
WBGene00019024	1.02897
WBGene00018725	1.02869
WBGene00015300	1.02826
WBGene00016898	1.02748
WBGene00018308	1.02721
WBGene00007560	1.02717
WBGene00011350	1.02634
WBGene00000685	1.02463
WBGene00018084	1.02442
WBGene00000745	1.02357
WBGene00004141	1.02316
WBGene00015596	1.02215
WBGene00002130	1.01913
WBGene00016954	1.01912
WBGene00009394	1.019
WBGene00013610	1.01772
WBGene00015820	1.01694
WBGene00001828	1.0136
WBGene00011278	1.01343
WBGene00021002	1.01335
WBGene00000663	1.01216
WBGene00009192	1.01198
WBGene00020786	1.01179
WBGene00019471	1.0098
WBGene00012637	1.00972
WBGene00008068	1.00951
WBGene00011428	1.00885
WBGene00020838	1.00824
WBGene00019189	1.00763
WBGene00004811	1.00757
WBGene00010678	1.00723
WBGene00019565	1.00721
WBGene00010719	1.00654
WBGene00015819	1.00584
WBGene00004736	1.00555
WBGene00019644	1.00483
WBGene00018343	1.00442
WBGene00001854	1.00213
WBGene00018763	1.00055
WBGene00001753	1.00039
WBGene00017418	0.998611
WBGene00010760	0.997488
WBGene00003159	0.997409
WBGene00019604	0.996383
WBGene00009402	0.99628
WBGene00013999	0.995847
WBGene00022763	0.994844
WBGene00010514	0.993719
WBGene00009327	0.993663
WBGene00010289	0.993085
WBGene00044623	0.9917
WBGene00007308	0.99141
WBGene00012433	0.989923
WBGene00003796	0.989732
WBGene00009226	0.989094
WBGene00015516	0.988181
WBGene00007404	0.987176
WBGene00019160	0.986614
WBGene00000216	0.985054
WBGene00021043	0.984735
WBGene00018730	0.984359
WBGene00003095	0.983632
WBGene00018195	0.983424
WBGene00007225	0.983374
WBGene00003515	0.98283
WBGene00017937	0.982072
WBGene00011938	0.981871
WBGene00012324	0.981847
WBGene00004177	0.981679
WBGene00008916	0.981569
WBGene00018119	0.981549
WBGene00006787	0.980011
WBGene00013979	0.979965
WBGene00017789	0.979052
WBGene00000610	0.978445
WBGene00007793	0.977922
WBGene00009396	0.976568
WBGene00020336	0.976255
WBGene00004120	0.975853
WBGene00009424	0.975656
WBGene00012123	0.975529
WBGene00009463	0.974729
WBGene00002116	0.974518
WBGene00011362	0.974029
WBGene00018903	0.972902
WBGene00012648	0.97189
WBGene00002273	0.971274
WBGene00009344	0.970732
WBGene00010265	0.970589
WBGene00022665	0.968311
WBGene00004750	0.968284
WBGene00017582	0.968159
WBGene00007867	0.967672
WBGene00001729	0.96746
WBGene00020878	0.967245
WBGene00018614	0.966696
WBGene00001599	0.965754
WBGene00003554	0.964773
WBGene00004144	0.964647
WBGene00010254	0.964161
WBGene00001598	0.963514
WBGene00008595	0.963118
WBGene00010835	0.962742
WBGene00021186	0.961275
WBGene00011763	0.960861
WBGene00000650	0.960775
WBGene00003495	0.956685
WBGene00004000	0.956609
WBGene00007969	0.956359
WBGene00002068	0.954685
WBGene00012431	0.952077
WBGene00020205	0.951975
WBGene00018489	0.951823
WBGene00018123	0.947517
WBGene00015908	0.946576
WBGene00001695	0.943688
WBGene00011446	0.943075
WBGene00002348	0.942326
WBGene00020785	0.942088
WBGene00002225	0.941382
WBGene00008277	0.94137
WBGene00007766	0.941324
WBGene00008862	0.941205
WBGene00015933	0.940109
WBGene00012069	0.938695
WBGene00016274	0.938685
WBGene00021128	0.938338
WBGene00017590	0.938247
WBGene00009404	0.937943
WBGene00009313	0.937478
WBGene00008572	0.936424
WBGene00018529	0.935908
WBGene00016379	0.934605
WBGene00022578	0.934241
WBGene00012101	0.933965
WBGene00016262	0.933516
WBGene00012405	0.933274
WBGene00020758	0.931811
WBGene00001724	0.929337
WBGene00000626	0.929234
WBGene00011692	0.928337
WBGene00007232	0.927762
WBGene00000029	0.927277
WBGene00016892	0.926501
WBGene00009001	0.925866
WBGene00018978	0.925435
WBGene00019682	0.925192
WBGene00020202	0.924954
WBGene00007601	0.924418
WBGene00010473	0.924236
WBGene00019154	0.922115
WBGene00000637	0.921874
WBGene00016163	0.92171
WBGene00007246	0.919282
WBGene00018398	0.918162
WBGene00001390	0.917325
WBGene00010323	0.915645
WBGene00010660	0.915256
WBGene00010472	0.915162
WBGene00020788	0.914943
WBGene00003618	0.914561
WBGene00020741	0.914253
WBGene00013234	0.913749
WBGene00007169	0.910857
WBGene00020714	0.910226
WBGene00011392	0.910169
WBGene00021156	0.909871
WBGene00020907	0.909807
WBGene00003877	0.909713
WBGene00019912	0.909213
WBGene00012074	0.908579
WBGene00000648	0.908369
WBGene00003753	0.908182
WBGene00010953	0.90673
WBGene00008842	0.906164
WBGene00018487	0.906089
WBGene00002248	0.906018
WBGene00004062	0.905099
WBGene00017716	0.902993
WBGene00011505	0.902912
WBGene00007773	0.902648
WBGene00009824	0.902509
WBGene00022789	0.901365
WBGene00000067	0.899715
WBGene00019380	0.899488
WBGene00015044	0.898995
WBGene00014009	0.898838
WBGene00018268	0.897243
WBGene00013074	0.896766
WBGene00018418	0.895542
WBGene00020261	0.895079
WBGene00015094	0.894572
WBGene00009995	0.893933
WBGene00004924	0.893636
WBGene00017843	0.893467
WBGene00016179	0.893342
WBGene00003786	0.892956
WBGene00008602	0.892266
WBGene00004017	0.89225
WBGene00021081	0.891853
WBGene00018488	0.89184
WBGene00007231	0.891797
WBGene00017221	0.891771
WBGene00016486	0.891726
WBGene00016731	0.891108
WBGene00011837	0.889123
WBGene00008010	0.88752
WBGene00016830	0.886722
WBGene00013090	0.886668
WBGene00012428	0.88666
WBGene00008772	0.885749
WBGene00016398	0.885304
WBGene00015780	0.884346
WBGene00018548	0.884198
WBGene00000639	0.883769
WBGene00019489	0.883371
WBGene00005586	0.88336
WBGene00008038	0.882818
WBGene00000772	0.881341
WBGene00008354	0.881189
WBGene00016483	0.881073
WBGene00008556	0.880612
WBGene00022546	0.880586
WBGene00008823	0.87947
WBGene00017819	0.878048
WBGene00012322	0.87728
WBGene00002136	0.876033
WBGene00009682	0.873299
WBGene00012437	0.871756
WBGene00008692	0.870772
WBGene00009984	0.870735
WBGene00001189	0.869961
WBGene00015931	0.869298
WBGene00013073	0.867892
WBGene00019105	0.86782
WBGene00018729	0.867723
WBGene00018052	0.867632
WBGene00012429	0.86732
WBGene00007156	0.867143
WBGene00000030	0.866945
WBGene00017205	0.866747
WBGene00004989	0.866605
WBGene00013145	0.865995
WBGene00020200	0.865168
WBGene00012067	0.864764
WBGene00011182	0.864469
WBGene00010253	0.863945
WBGene00020471	0.863838
WBGene00015400	0.863314
WBGene00010050	0.863259
WBGene00008143	0.862337
WBGene00020891	0.861987
WBGene00001752	0.861556
WBGene00001603	0.861485
WBGene00004932	0.861024
WBGene00015726	0.860632
WBGene00015878	0.860069
WBGene00017955	0.857978
WBGene00008937	0.857652
WBGene00016824	0.856256
WBGene00012618	0.856184
WBGene00007290	0.855937
WBGene00001099	0.855632
WBGene00016153	0.854481
WBGene00016077	0.854248
WBGene00020543	0.852577
WBGene00006376	0.851545
WBGene00016474	0.850967
WBGene00019293	0.850803
WBGene00013490	0.850665
WBGene00009421	0.85029
WBGene00020042	0.850132
WBGene00000389	0.849885
WBGene00002005	0.849654
WBGene00016942	0.849064
WBGene00015886	0.849042
WBGene00011676	0.848852
WBGene00044078	0.848151
WBGene00008803	0.847912
WBGene00003242	0.847341
WBGene00015394	0.846023
WBGene00013811	0.845677
WBGene00009423	0.845375
WBGene00011801	0.845144
WBGene00000031	0.84503
WBGene00010064	0.844026
WBGene00010658	0.843974
WBGene00003746	0.84391
WBGene00015987	0.843673
WBGene00015937	0.843068
WBGene00020062	0.843053
WBGene00010617	0.841736
WBGene00017244	0.841426
WBGene00007938	0.840699
WBGene00012120	0.840424
WBGene00005805	0.840313
WBGene00008202	0.839037
WBGene00004902	0.838377
WBGene00011778	0.837984
WBGene00009345	0.837776
WBGene00018948	0.837739
WBGene00008040	0.837658
WBGene00010541	0.837628
WBGene00010609	0.837054
WBGene00010659	0.836774
WBGene00016485	0.83664
WBGene00014238	0.836537
WBGene00020438	0.836247
WBGene00010419	0.835731
WBGene00006509	0.835593
WBGene00020571	0.834893
WBGene00000678	0.834718
WBGene00012144	0.834388
WBGene00011157	0.834179
WBGene00008824	0.830489
WBGene00020832	0.829663
WBGene00007881	0.829412
WBGene00008304	0.828599
WBGene00012855	0.828466
WBGene00021013	0.828343
WBGene00004998	0.828337
WBGene00016453	0.828233
WBGene00018237	0.827708
WBGene00008194	0.826621
WBGene00009338	0.826362
WBGene00013882	0.82571
WBGene00007440	0.82486
WBGene00017930	0.82477
WBGene00022562	0.824677
WBGene00004001	0.824002
WBGene00022649	0.82357
WBGene00020588	0.823484
WBGene00010128	0.823121
WBGene00011831	0.822804
WBGene00021288	0.822484
WBGene00000786	0.822407
WBGene00006636	0.821712
WBGene00011231	0.820954
WBGene00007190	0.820819
WBGene00011561	0.820798
WBGene00001413	0.81893
WBGene00012825	0.818867
WBGene00005612	0.818761
WBGene00009261	0.817927
WBGene00007823	0.817614
WBGene00008793	0.817406
WBGene00001447	0.817008
WBGene00004104	0.816729
WBGene00020836	0.815393
WBGene00017636	0.815249
WBGene00009209	0.815201
WBGene00011733	0.814901
WBGene00015315	0.814335
WBGene00015434	0.814298
WBGene00015433	0.813815
WBGene00018971	0.813349
WBGene00000802	0.813001
WBGene00001428	0.812865
WBGene00011236	0.812439
WBGene00015718	0.812095
WBGene00000687	0.811349
WBGene00019332	0.811224
WBGene00001772	0.810899
WBGene00005406	0.80984
WBGene00000632	0.809785
WBGene00012255	0.809426
WBGene00000301	0.809232
WBGene00008028	0.809106
WBGene00003778	0.808045
WBGene00016449	0.806837
WBGene00008586	0.805703
WBGene00003154	0.805365
WBGene00017845	0.805074
WBGene00020841	0.804898
WBGene00005983	0.804695
WBGene00003420	0.804669
WBGene00013840	0.804347
WBGene00006404	0.802615
WBGene00010195	0.802039
WBGene00001784	0.801879
WBGene00009427	0.80071
WBGene00009645	0.800166
WBGene00005744	0.797549
WBGene00021726	0.796232
WBGene00003536	0.79544
WBGene00015229	0.794524
WBGene00012032	0.794427
WBGene00001079	0.793618
WBGene00001446	0.793193
WBGene00016594	0.792695
WBGene00016322	0.792384
WBGene00017780	0.792318
WBGene00002272	0.792225
WBGene00011467	0.790848
WBGene00010155	0.790631
WBGene00018024	0.789733
WBGene00002212	0.789051
WBGene00015569	0.78887
WBGene00010789	0.788847
WBGene00016513	0.788615
WBGene00016783	0.78819
WBGene00004153	0.788176
WBGene00008589	0.787065
WBGene00012456	0.786621
WBGene00017695	0.785462
WBGene00009349	0.784726
WBGene00002214	0.784026
WBGene00005813	0.78238
WBGene00003055	0.782214
WBGene00020869	0.781561
WBGene00015919	0.781355
WBGene00008605	0.781295
WBGene00006585	0.781184
WBGene00011805	0.780937
WBGene00002056	0.780876
WBGene00010611	0.780206
WBGene00003999	0.779205
WBGene00017420	0.778673
WBGene00012942	0.778253
WBGene00016572	0.777193
WBGene00003523	0.776739
WBGene00011596	0.775993
WBGene00005076	0.775668
WBGene00011530	0.775413
WBGene00004333	0.775194
WBGene00000878	0.773952
WBGene00014154	0.773495
WBGene00019111	0.773494
WBGene00018311	0.772162
WBGene00011397	0.771594
WBGene00009143	0.771463
WBGene00007559	0.771369
WBGene00002258	0.770429
WBGene00000865	0.77034
WBGene00013233	0.769866
WBGene00008163	0.76985
WBGene00015696	0.768839
WBGene00009214	0.768653
WBGene00005123	0.768247
WBGene00017604	0.767403
WBGene00001829	0.767366
WBGene00011388	0.766905
WBGene00018117	0.766902
WBGene00000725	0.766463
WBGene00022652	0.766279
WBGene00020009	0.765749
WBGene00010241	0.765346
WBGene00015722	0.765206
WBGene00019279	0.764131
WBGene00020732	0.763919
WBGene00014095	0.763522
WBGene00009573	0.763433
WBGene00015723	0.762186
WBGene00020232	0.762072
WBGene00020873	0.761032
WBGene00020541	0.76077
WBGene00012785	0.76064
WBGene00003545	0.76052
WBGene00015848	0.760049
WBGene00015598	0.758845
WBGene00016669	0.758813
WBGene00022261	0.758193
WBGene00017436	0.757057
WBGene00002186	0.756976
WBGene00022048	0.755442
WBGene00014045	0.755134
WBGene00018602	0.753975
WBGene00013284	0.753409
WBGene00008312	0.753346
WBGene00020064	0.752817
WBGene00022511	0.75269
WBGene00019313	0.752547
WBGene00003752	0.752126
WBGene00015719	0.752117
WBGene00018530	0.751966
WBGene00012945	0.751799
WBGene00017565	0.751214
WBGene00006562	0.75007
WBGene00015467	0.749928
WBGene00009550	0.748969
WBGene00019233	0.74846
WBGene00017414	0.748455
WBGene00015193	0.748097
WBGene00010538	0.745584
WBGene00022617	0.745434
WBGene00010785	0.745019
WBGene00017305	0.744871
WBGene00001068	0.744583
WBGene00015727	0.744341
WBGene00020971	0.74319
WBGene00020239	0.743137
WBGene00019921	0.743026
WBGene00009539	0.742878
WBGene00002008	0.742071
WBGene00002125	0.741891
WBGene00018082	0.741828
WBGene00001388	0.741795
WBGene00012207	0.741137
WBGene00010018	0.741064
WBGene00017133	0.74077
WBGene00003534	0.73939
WBGene00010635	0.739177
WBGene00009393	0.738687
WBGene00015089	0.738448
WBGene00017294	0.738094
WBGene00020670	0.737939
WBGene00019438	0.736385
WBGene00009803	0.736384
WBGene00007153	0.735555
WBGene00002064	0.734987
WBGene00008448	0.734977
WBGene00017774	0.734815
WBGene00000905	0.734773
WBGene00008655	0.733849
WBGene00010928	0.73363
WBGene00003762	0.733297
WBGene00015655	0.733245
WBGene00004084	0.733014
WBGene00011464	0.731779
WBGene00006351	0.731575
WBGene00019851	0.731499
WBGene00007610	0.731372
WBGene00001595	0.731189
WBGene00016291	0.730625
WBGene00009459	0.729907
WBGene00018347	0.729159
WBGene00022706	0.729103
WBGene00018724	0.728945
WBGene00001570	0.728709
WBGene00017485	0.728486
WBGene00014067	0.728323
WBGene00011021	0.727845
WBGene00010492	0.727343
WBGene00001462	0.727267
WBGene00015514	0.726671
WBGene00018590	0.725538
WBGene00007422	0.725362
WBGene00015763	0.725024
WBGene00002057	0.725018
WBGene00011358	0.723934
WBGene00019523	0.723821
WBGene00008080	0.721777
WBGene00018798	0.721636
WBGene00018049	0.721521
WBGene00002101	0.721022
WBGene00007700	0.720162
WBGene00011059	0.720128
WBGene00013779	0.72009
WBGene00008559	0.718089
WBGene00011491	0.717802
WBGene00015944	0.71714
WBGene00009877	0.715233
WBGene00020497	0.715174
WBGene00018048	0.715086
WBGene00017671	0.71501
WBGene00001435	0.715003
WBGene00003620	0.714185
WBGene00002253	0.713711
WBGene00015546	0.713614
WBGene00005664	0.713029
WBGene00012171	0.712986
WBGene00020007	0.712545
WBGene00018081	0.7124
WBGene00011342	0.712262
WBGene00003957	0.712253
WBGene00004020	0.71066
WBGene00003091	0.710501
WBGene00013398	0.709772
WBGene00022876	0.708756
WBGene00009581	0.70797
WBGene00009391	0.707707
WBGene00007303	0.707506
WBGene00003837	0.707071
WBGene00010411	0.706975
WBGene00011438	0.706846
WBGene00003994	0.706405
WBGene00011475	0.70619
WBGene00002226	0.705357
WBGene00008724	0.704978
WBGene00015766	0.70434
WBGene00016111	0.704182
WBGene00018057	0.704105
WBGene00007337	0.704015
WBGene00011918	0.703795
WBGene00015965	0.703597
WBGene00008592	0.702997
WBGene00020535	0.702463
WBGene00013070	0.701874
WBGene00005263	0.701815
WBGene00007535	0.701274
WBGene00013897	0.701211
WBGene00001483	0.701148
WBGene00015912	0.698921
WBGene00013713	0.698751
WBGene00010266	0.698063
WBGene00018500	0.697558
WBGene00017788	0.697329
WBGene00011432	0.697069
WBGene00015954	0.696777
WBGene00001732	0.696531
WBGene00010126	0.696243
WBGene00004003	0.696202
WBGene00018706	0.695929
WBGene00007081	0.695396
WBGene00016425	0.695371
WBGene00008964	0.69512
WBGene00003573	0.694908
WBGene00016358	0.694709
WBGene00008816	0.69387
WBGene00014171	0.693805
WBGene00019412	0.692867
WBGene00006886	0.692806
WBGene00008710	0.692664
WBGene00019208	0.692609
WBGene00007521	0.692314
WBGene00017808	0.691036
WBGene00005879	0.690844
WBGene00003739	0.690785
WBGene00008333	0.688638
WBGene00008596	0.688396
WBGene00005678	0.688371
WBGene00015479	0.688239
WBGene00009347	0.687886
WBGene00011168	0.687063
WBGene00001158	0.686563
WBGene00017021	0.686038
WBGene00009372	0.685551
WBGene00020410	0.683829
WBGene00003995	0.683826
WBGene00003981	0.683767
WBGene00006980	0.683367
WBGene00000726	0.683301
WBGene00011493	0.683213
WBGene00012716	0.682823
WBGene00013699	0.68281
WBGene00010885	0.682763
WBGene00001110	0.682381
WBGene00022265	0.6815
WBGene00013078	0.68109
WBGene00005085	0.680562
WBGene00016481	0.680431
WBGene00015692	0.68036
WBGene00015695	0.680323
WBGene00015828	0.679322
WBGene00013515	0.679218
WBGene00044449	0.67891
WBGene00007866	0.678615
WBGene00015762	0.677121
WBGene00018505	0.676768
WBGene00012398	0.676428
WBGene00006780	0.67621
WBGene00011307	0.675868
WBGene00011330	0.675227
WBGene00008959	0.67456
WBGene00020289	0.673681
WBGene00008207	0.673171
WBGene00019176	0.672699
WBGene00023408	0.67266
WBGene00006789	0.67205
WBGene00007397	0.671918
WBGene00011781	0.671028
WBGene00007990	0.670637
WBGene00019514	0.670382
WBGene00008462	0.670127
WBGene00019803	0.670087
WBGene00020400	0.669502
WBGene00019280	0.669396
WBGene00017336	0.668913
WBGene00010508	0.668906
WBGene00018056	0.668464
WBGene00007876	0.668305
WBGene00006377	0.668153
WBGene00016653	0.667436
WBGene00018744	0.666829
WBGene00008784	0.666647
WBGene00011305	0.666488
WBGene00011624	0.6659
WBGene00007460	0.665447
WBGene00019675	0.665331
WBGene00002055	0.665103
WBGene00009577	0.664975
WBGene00008794	0.664955
WBGene00016667	0.664838
WBGene00011289	0.66478
WBGene00019531	0.664484
WBGene00011580	0.66442
WBGene00013935	0.664241
WBGene00007778	0.664211
WBGene00016281	0.664029
WBGene00009149	0.664008
WBGene00001984	0.663756
WBGene00019846	0.663721
WBGene00019386	0.663543
WBGene00011104	0.663487
WBGene00006719	0.663308
WBGene00014184	0.662415
WBGene00012850	0.662125
WBGene00006589	0.662008
WBGene00018211	0.661933
WBGene00003785	0.66147
WBGene00015911	0.661246
WBGene00013279	0.660654
WBGene00015163	0.659103
WBGene00009415	0.658868
WBGene00005585	0.658337
WBGene00001770	0.657867
WBGene00009488	0.65764
WBGene00011416	0.657454
WBGene00018096	0.656972
WBGene00001452	0.656856
WBGene00015597	0.655389
WBGene00007277	0.655151
WBGene00008072	0.655013
WBGene00009239	0.654439
WBGene00018250	0.654414
WBGene00020523	0.654354
WBGene00016733	0.654076
WBGene00005270	0.653333
WBGene00007517	0.652811
WBGene00013079	0.652412
WBGene00000611	0.652407
WBGene00018792	0.652301
WBGene00004392	0.651018
WBGene00018271	0.650944
WBGene00003763	0.650887
WBGene00015403	0.650571
WBGene00020627	0.650563
WBGene00011895	0.650409
WBGene00009946	0.650092
WBGene00005911	0.649365
WBGene00005181	0.649256
WBGene00001767	0.649207
WBGene00016512	0.648641
WBGene00017103	0.648154
WBGene00016309	0.647324
WBGene00013077	0.647271
WBGene00019920	0.647113
WBGene00020280	0.646482
WBGene00004076	0.646407
WBGene00016133	0.646392
WBGene00018862	0.646062
WBGene00017892	0.646
WBGene00004135	0.645826
WBGene00011275	0.645568
WBGene00015660	0.645235
WBGene00018026	0.644582
WBGene00007699	0.644074
WBGene00021010	0.643937
WBGene00017215	0.643807
WBGene00016083	0.643518
WBGene00009483	0.643349
WBGene00007204	0.642641
WBGene00015549	0.642511
WBGene00009818	0.642387
WBGene00001578	0.641775
WBGene00017596	0.641666
WBGene00018000	0.641066
WBGene00013087	0.640711
WBGene00009628	0.640054
WBGene00008908	0.639685
WBGene00006530	0.639541
WBGene00011076	0.639154
WBGene00017262	0.637494
WBGene00009252	0.637478
WBGene00020554	0.637162
WBGene00015071	0.637054
WBGene00018497	0.636679
WBGene00010162	0.636385
WBGene00011737	0.635926
WBGene00004123	0.635744
WBGene00018162	0.635629
WBGene00004973	0.635504
WBGene00004965	0.63519
WBGene00011838	0.634932
WBGene00008053	0.634546
WBGene00015216	0.634527
WBGene00010896	0.634016
WBGene00011834	0.632993
WBGene00007710	0.632357
WBGene00011471	0.63234
WBGene00013698	0.631965
WBGene00005867	0.631888
WBGene00011997	0.631795
WBGene00018318	0.631498
WBGene00016079	0.630996
WBGene00000723	0.630413
WBGene00012814	0.629573
WBGene00010595	0.628865
WBGene00017691	0.628783
WBGene00016433	0.628625
WBGene00015465	0.628489
WBGene00004264	0.627575
WBGene00009036	0.62745
WBGene00007947	0.624988
WBGene00008303	0.624752
WBGene00010493	0.624234
WBGene00016212	0.623942
WBGene00011203	0.623688
WBGene00021293	0.623031
WBGene00020362	0.622899
WBGene00000133	0.622858
WBGene00003992	0.620876
WBGene00012201	0.62069
WBGene00011952	0.6187
WBGene00007674	0.618633
WBGene00009324	0.618458
WBGene00000108	0.618259
WBGene00011419	0.61824
WBGene00007233	0.61682
WBGene00003671	0.616801
WBGene00017093	0.616797
WBGene00000066	0.615687
WBGene00013891	0.615671
WBGene00007978	0.615097
WBGene00015504	0.615016
WBGene00010046	0.61443
WBGene00019092	0.614355
WBGene00000988	0.613799
WBGene00000469	0.613786
WBGene00020525	0.613573
WBGene00017149	0.612967
WBGene00019562	0.61286
WBGene00015141	0.612564
WBGene00010298	0.611865
WBGene00013085	0.611487
WBGene00001761	0.611296
WBGene00006071	0.610316
WBGene00005112	0.609938
WBGene00008486	0.609166
WBGene00000373	0.608739
WBGene00019146	0.608432
WBGene00010051	0.60841
WBGene00009383	0.608336
WBGene00010830	0.607135
WBGene00021730	0.607076
WBGene00020662	0.60564
WBGene00006370	0.604983
WBGene00013898	0.604078
WBGene00014262	0.60319
WBGene00008992	0.602971
WBGene00008899	0.60294
WBGene00010081	0.602921
WBGene00019597	0.602698
WBGene00010576	0.602577
WBGene00004818	0.60238
WBGene00004997	0.601524
WBGene00010238	0.600856
WBGene00011951	0.600586
WBGene00007857	0.600412
WBGene00015097	0.600141
WBGene00001839	0.599976
WBGene00004110	0.599568
WBGene00000114	0.599243
WBGene00020069	0.599101
WBGene00001160	0.598741
WBGene00010049	0.598544
WBGene00018969	0.598206
WBGene00007963	0.598053
WBGene00010468	0.596961
WBGene00010722	0.596921
WBGene00017431	0.596882
WBGene00011484	0.596566
WBGene00011084	0.596556
WBGene00019833	0.594555
WBGene00007448	0.594483
WBGene00009806	0.594305
WBGene00016061	0.594057
WBGene00015685	0.592639
WBGene00020707	0.592181
WBGene00044684	0.591938
WBGene00003658	0.591618
WBGene00019376	0.591505
WBGene00010168	0.591434
WBGene00009961	0.591314
WBGene00016644	0.590643
WBGene00019459	0.590524
WBGene00015495	0.589734
WBGene00003741	0.589391
WBGene00004230	0.588681
WBGene00003569	0.58862
WBGene00009948	0.588592
WBGene00010206	0.588559
WBGene00007274	0.588444
WBGene00001786	0.587258
WBGene00000445	0.587009
WBGene00009501	0.586981
WBGene00013475	0.586935
WBGene00011509	0.586664
WBGene00002088	0.586481
WBGene00017628	0.586439
WBGene00017861	0.586325
WBGene00000286	0.586299
WBGene00011844	0.585836
WBGene00007244	0.5853
WBGene00020003	0.584882
WBGene00000251	0.584876
WBGene00010022	0.584747
WBGene00008497	0.5845
WBGene00006974	0.583899
WBGene00012778	0.583655
WBGene00008220	0.583649
WBGene00002221	0.583355
WBGene00004002	0.583103
WBGene00010663	0.582987
WBGene00013478	0.582836
WBGene00006618	0.582711
WBGene00019785	0.582539
WBGene00011906	0.582347
WBGene00017092	0.581637
WBGene00015259	0.581379
WBGene00010869	0.581143
WBGene00009473	0.580058
WBGene00012795	0.579996
WBGene00008677	0.579294
WBGene00014007	0.579228
WBGene00012421	0.579018
WBGene00005743	0.578764
WBGene00003742	0.578687
WBGene00013207	0.578651
WBGene00000172	0.577962
WBGene00012849	0.577182
WBGene00005089	0.577179
WBGene00015280	0.577032
WBGene00007721	0.576636
WBGene00012543	0.576397
WBGene00010114	0.576321
WBGene00010931	0.57628
WBGene00015747	0.576142
WBGene00008844	0.575563
WBGene00010621	0.574873
WBGene00014199	0.574671
WBGene00020047	0.574191
WBGene00009896	0.573691
WBGene00017367	0.573497
WBGene00014251	0.573384
WBGene00020386	0.572348
WBGene00019970	0.572116
WBGene00017396	0.571384
WBGene00006982	0.571064
WBGene00007973	0.570961
WBGene00015059	0.57088
WBGene00010092	0.570761
WBGene00010987	0.570709
WBGene00007777	0.570435
WBGene00015694	0.569535
WBGene00019431	0.569493
WBGene00007966	0.568745
WBGene00001251	0.568483
WBGene00008693	0.568232
WBGene00010499	0.567385
WBGene00017573	0.567037
WBGene00018097	0.566222
WBGene00015442	0.56616
WBGene00020484	0.565695
WBGene00019552	0.565595
WBGene00020073	0.565338
WBGene00012291	0.564285
WBGene00008745	0.564012
WBGene00015610	0.563596
WBGene00010510	0.563574
WBGene00003647	0.563522
WBGene00000034	0.563413
WBGene00001768	0.563119
WBGene00018950	0.562983
WBGene00012399	0.562156
WBGene00020618	0.561688
WBGene00005730	0.561288
WBGene00004478	0.560643
WBGene00008296	0.560239
WBGene00010467	0.559756
WBGene00003934	0.559526
WBGene00014091	0.559284
WBGene00020864	0.558992
WBGene00012782	0.558011
WBGene00009548	0.55756
WBGene00013886	0.557471
WBGene00017810	0.556834
WBGene00022590	0.556269
WBGene00020915	0.556066
WBGene00012216	0.555812
WBGene00017039	0.555447
WBGene00011107	0.553859
WBGene00009721	0.553497
WBGene00017970	0.5534
WBGene00022013	0.553147
WBGene00004962	0.552739
WBGene00011199	0.552652
WBGene00016826	0.552582
WBGene00008652	0.552306
WBGene00011009	0.55202
WBGene00018054	0.551985
WBGene00013286	0.550362
WBGene00002048	0.55031
WBGene00019435	0.549708
WBGene00015693	0.549682
WBGene00014006	0.549546
WBGene00010118	0.547885
WBGene00009807	0.547231
WBGene00044062	0.54717
WBGene00017488	0.547015
WBGene00001819	0.546874
WBGene00005162	0.546757
WBGene00009099	0.546618
WBGene00019015	0.546553
WBGene00012631	0.546494
WBGene00014152	0.546249
WBGene00020427	0.545861
WBGene00019586	0.54578
WBGene00020393	0.544255
WBGene00010296	0.543754
WBGene00010682	0.543542
WBGene00017696	0.542133
WBGene00019203	0.54181
WBGene00017584	0.541445
WBGene00009546	0.541354
WBGene00011222	0.541317
WBGene00015568	0.541121
WBGene00005930	0.540164
WBGene00007894	0.539279
WBGene00014168	0.539166
WBGene00006965	0.53914
WBGene00001718	0.539053
WBGene00011171	0.538899
WBGene00005659	0.53859
WBGene00006953	0.538536
WBGene00009474	0.538107
WBGene00018121	0.53795
WBGene00002131	0.537883
WBGene00016598	0.5378
WBGene00019760	0.537763
WBGene00015929	0.5376
WBGene00018701	0.537262
WBGene00009890	0.53706
WBGene00015786	0.536111
WBGene00016555	0.535678
WBGene00017599	0.535557
WBGene00020416	0.534958
WBGene00007800	0.534698
WBGene00002067	0.534442
WBGene00009110	0.534387
WBGene00004219	0.534386
WBGene00018172	0.534314
WBGene00017705	0.533796
WBGene00044066	0.533629
WBGene00014252	0.533212
WBGene00016181	0.533109
WBGene00012551	0.532773
WBGene00012308	0.532692
WBGene00022705	0.532674
WBGene00010485	0.532502
WBGene00019237	0.532195
WBGene00011039	0.532024
WBGene00019100	0.532
WBGene00006876	0.531802
WBGene00009100	0.531556
WBGene00017481	0.530951
WBGene00008493	0.530755
WBGene00003740	0.530634
WBGene00012388	0.530106
[truncated: 10,603 more rows]
