# Supplementary material for: Multivariable regulation of gene expression plasticity in metazoans
Source: Open Biol. 2019 Dec 4;9(12):190150. doi: 10.1098/rsob.190150 (PMC6936262; doi:10.1098/rsob.190150)
Supplement: Table S10 [file rsob190150supp11.xlsx]

## Sheet: Protein-binding-and-GEP
Regulatory-protein	Sample	GEP-without-binding	GEP-with-binding	Mann–Whitney U test, Benjamini–Hochberg corrected P value	Effect									Q<0.01
ARID3A	HepG2	-2.9	-2.81	0.0213861	none									0.2
ARID3A	K562	-2.89	-2.9	0.530897	none									0.2
ATF1	K562	-2.89	-2.88	0.523879	none									0.2
ATF2	GM12878	-2.91	-2.82	0.0012996	promoting									0.2
ATF2	H1-hESC	-2.89	-2.87	0.546889	none									0.2
ATF3	A549	-2.89	-2.91	0.447695	none									0.214286
ATF3	GM12878	-2.88	-3.01	0.00234781	repressive									0.25
ATF3	H1-hESC	-2.88	-2.96	0.00628715	repressive									0.25
ATF3	HepG2	-2.88	-2.97	0.00374542	repressive									0.25
ATF3	K562	-2.88	-2.91	0.0623359	none									0.3
BACH1	H1-hESC	-2.9	-2.85	0.0458639	none									0.333333
BACH1	K562	-2.89	-2.87	0.98996	none									0.333333
BATF	GM12878	-2.91	-2.63	1.2524e-10	promoting									0.333333
BCL11A	GM12878	-2.9	-2.68	5.9085e-07	promoting									0.4
BCL11A	H1-hESC	-2.89	-2.85	0.988917	none									0.4
BCL3	A549	-2.89	-2.88	0.999	none									0.4
BCL3	GM12878	-2.9	-2.83	0.144699	none									0.428571
BCL3	K562	-2.89	-2.92	0.829418	none									0.444444
BCLAF1	GM12878	-2.88	-2.94	0.0150205	none									0.5
BCLAF1	K562	-2.89	-2.91	0.0629283	none									0.5
BDP1	HeLa-S3	-2.89	-2.99	0.984699	none									0.5
BDP1	K562	-2.89	-2.97	0.912291	none									0.5
BHLHE40	A549	-2.89	-2.85	0.131861	none									0.5
BHLHE40	GM12878	-2.91	-2.8	0.000134271	promoting									0.5
BHLHE40	HepG2	-2.91	-2.85	0.0269914	none									0.5
BHLHE40	K562	-2.91	-2.86	0.162221	none									0.5
BRCA1	GM12878	-2.89	-2.91	0.261658	none									0.5
BRCA1	H1-hESC	-2.89	-2.93	0.0587022	none									0.5
BRCA1	HeLa-S3	-2.88	-2.93	0.0518074	none									0.5
BRCA1	HepG2	-2.89	-2.92	0.118429	none									0.6
BRF1	HeLa-S3	-2.89	-2.56	0.47046	none									0.625
BRF1	K562	-2.89	-2.76	0.765541	none									0.666667
BRF2	HeLa-S3	-2.89	-2.86	0.546889	none									0.666667
BRF2	K562	-2.89	-2.57	0.138619	none									0.666667
CBX3	K562	-2.9	-2.85	0.261658	none									0.666667
CCNT2	K562	-2.96	-2.83	1.77116e-05	promoting									0.666667
CEBPB	A549	-2.91	-2.69	2.424e-12	promoting									0.666667
CEBPB	GM12878	-2.9	-2.77	0.00184866	promoting									0.7
CEBPB	H1-hESC	-2.91	-2.71	6.43627e-07	promoting									1
CEBPB	HeLa-S3	-2.94	-2.76	7.00687e-16	promoting									1
CEBPB	HepG2	-2.91	-2.78	3.26813e-06	promoting									1
CEBPB	IMR90	-2.92	-2.71	1.03674e-15	promoting									1
CEBPB	K562	-2.91	-2.78	8.13397e-06	promoting									0
CEBPD	HepG2	-2.92	-2.82	9.48788e-06	promoting									0
CHD1	GM12878	-2.91	-2.77	2.20991e-06	promoting									0
CHD1	H1-hESC	-2.93	-2.75	3.15625e-13	promoting									0
CHD1	K562	-2.91	-2.83	0.000544046	promoting									0
CHD2	GM12878	-2.9	-2.88	0.935223	none									0
CHD2	H1-hESC	-2.88	-2.91	0.0580831	none									0
CHD2	HeLa-S3	-2.93	-2.85	0.000789221	promoting									0
CHD2	HepG2	-2.89	-2.89	0.244484	none									0
CHD2	K562	-2.89	-2.89	0.352757	none									0
CREB1	A549	-2.93	-2.85	0.0027345	promoting									0
CTBP2	H1-hESC	-2.92	-2.7	3.12819e-12	promoting									0
CTCF	A549	-2.94	-2.79	1.3534e-13	promoting									0
CTCF	AG04449	-2.94	-2.78	5.2318e-13	promoting									0
CTCF	AG04450	-2.92	-2.79	1.32345e-09	promoting									0
CTCF	AG09309	-2.91	-2.83	7.43558e-05	promoting									0
CTCF	AG09319	-2.93	-2.79	1.13625e-09	promoting									0
CTCF	AG10803	-2.91	-2.81	5.61111e-06	promoting									0
CTCF	AoAF	-2.92	-2.79	2.23992e-09	promoting									0
CTCF	BE2_C	-2.91	-2.83	0.000262327	promoting									0
CTCF	BJ	-2.92	-2.79	2.38873e-09	promoting									0
CTCF	Caco-2	-2.92	-2.79	7.87206e-09	promoting									0
CTCF	Dnd41	-2.91	-2.83	0.00102942	promoting									0
CTCF	ECC-1	-2.88	-2.95	0.429916	none									0
CTCF	Fibrobl	-2.93	-2.8	9.32054e-11	promoting									0
CTCF	Gliobla	-2.92	-2.8	1.11306e-10	promoting									0
CTCF	GM06990	-2.91	-2.81	2.86963e-05	promoting									0
CTCF	GM12801	-2.89	-3.01	0.239775	none									0
CTCF	GM12864	-2.92	-2.81	7.06211e-06	promoting									0
CTCF	GM12865	-2.92	-2.8	7.28915e-07	promoting									0
CTCF	GM12872	-2.91	-2.81	2.20991e-06	promoting									0
CTCF	GM12873	-2.92	-2.8	5.5601e-07	promoting									0
CTCF	GM12874	-2.91	-2.81	1.10422e-05	promoting									0
CTCF	GM12875	-2.91	-2.79	2.5036e-06	promoting									0
CTCF	GM12878	-2.93	-2.79	1.98115e-10	promoting									0
CTCF	GM12891	-2.93	-2.79	9.68969e-11	promoting									0
CTCF	GM12892	-2.94	-2.8	1.77952e-11	promoting									0
CTCF	GM19238	-2.94	-2.79	2.32606e-12	promoting									0
CTCF	GM19239	-2.93	-2.78	1.56202e-12	promoting									0
CTCF	GM19240	-2.93	-2.79	2.40618e-12	promoting									0
CTCF	H1-hESC	-2.91	-2.84	0.000884366	promoting									0
CTCF	HAc	-2.92	-2.79	1.75067e-08	promoting									0
CTCF	HA-sp	-2.91	-2.8	4.85737e-07	promoting									0
CTCF	HBMEC	-2.92	-2.81	2.94855e-07	promoting									0
CTCF	HCFaa	-2.91	-2.81	0.000262327	promoting									0
CTCF	HCM	-2.92	-2.79	1.60412e-10	promoting									0
CTCF	HCPEpiC	-2.93	-2.79	1.59917e-09	promoting									0
CTCF	HCT-116	-2.91	-2.82	6.96335e-05	promoting									0
CTCF	HEEpiC	-2.91	-2.81	6.25692e-05	promoting									0
CTCF	HEK293	-2.9	-2.84	0.00413934	promoting									0
CTCF	HeLa-S3	-2.91	-2.82	7.28915e-07	promoting									0
CTCF	HepG2	-2.91	-2.83	0.000276935	promoting									0
CTCF	HFF	-2.9	-2.83	0.00152903	promoting									0
CTCF	HFF-Myc	-2.9	-2.84	0.00502947	promoting									0
CTCF	HL-60	-2.89	-2.91	0.447695	none									0
CTCF	HMEC	-2.93	-2.79	4.68744e-12	promoting									0
CTCF	HMF	-2.91	-2.82	0.00012144	promoting									0
CTCF	HPAF	-2.92	-2.79	1.46723e-08	promoting									0
CTCF	HPF	-2.92	-2.79	5.6341e-08	promoting									0
CTCF	HRE	-2.91	-2.82	0.000132675	promoting									0
CTCF	HRPEpiC	-2.91	-2.81	2.83479e-06	promoting									0
CTCF	HSMM	-2.91	-2.83	0.000153567	promoting									0
CTCF	HSMMtube	-2.9	-2.83	0.00133634	promoting									0
CTCF	HUVEC	-2.92	-2.78	8.90636e-11	promoting									0
CTCF	HVMF	-2.91	-2.81	3.48206e-06	promoting									0
CTCF	IMR90	-2.92	-2.81	1.92697e-06	promoting									0
CTCF	K562	-2.91	-2.86	0.0063024	promoting									0
CTCF	MCF-7	-2.96	-2.79	1.38707e-16	promoting									0
CTCF	NB4	-2.89	-2.9	0.578455	none									1
CTCF	NH-A	-2.9	-2.85	0.00373996	promoting									1
CTCF	NHDF-Ad	-2.9	-2.85	0.00661932	promoting									0.8
CTCF	NHDF-neo	-2.92	-2.8	2.62929e-07	promoting									0.833333
CTCF	NHEK	-2.93	-2.81	2.30585e-10	promoting									0.875
CTCF	NHLF	-2.92	-2.79	2.87462e-09	promoting									0.942857
CTCF	Osteobl	-2.91	-2.82	0.000380733	promoting									0.75
CTCF	ProgFib	-2.92	-2.79	2.88972e-10	promoting									1
CTCF	RPTEC	-2.92	-2.79	8.92899e-09	promoting									1
CTCF	SAEC	-2.92	-2.81	3.3792e-07	promoting									1
CTCF	SK-N-SH_RA	-2.93	-2.8	5.11427e-10	promoting									1
CTCF	T-47D	-2.9	-2.83	0.00139171	promoting									1
CTCF	WERI-Rb-1	-2.91	-2.83	0.00079393	promoting									1
CTCF	WI-38	-2.9	-2.83	0.00879294	promoting									1
CTCFL	K562	-2.89	-2.9	0.63989	none									0.75
E2F1	HeLa-S3	-2.99	-2.76	8.585e-26	promoting									0.75
E2F1	MCF-7	-2.99	-2.79	3.61305e-17	promoting									0.75
E2F4	GM12878	-2.91	-2.81	0.00162925	promoting									0.75
E2F4	HeLa-S3	-2.92	-2.7	1.1615e-16	promoting									1
E2F4	K562	-2.91	-2.85	0.0651966	none									1
E2F4	MCF10A-Er-Src	-2.96	-2.81	2.71437e-09	promoting									1
E2F6	HeLa-S3	-2.92	-2.77	1.33965e-08	promoting									1
E2F6	K562	-2.97	-2.83	3.26813e-06	promoting									1
EBF1	GM12878	-2.94	-2.77	2.25672e-12	promoting									1
EGR1	GM12878	-2.91	-2.87	0.23504	none									1
EGR1	H1-hESC	-2.89	-2.88	0.748308	none									1
EGR1	K562	-2.93	-2.86	0.025338	none									1
ELF1	A549	-2.86	-2.94	1.7608e-06	repressive									1
ELF1	GM12878	-2.91	-2.87	0.2525	none									1
ELF1	HepG2	-2.89	-2.89	0.173898	none									1
ELF1	K562	-2.89	-2.89	0.33875	none									1
ELK1	GM12878	-2.87	-2.96	2.20991e-06	repressive									1
ELK1	HeLa-S3	-2.86	-2.97	3.87167e-08	repressive									1
ELK1	K562	-2.87	-2.99	1.6929e-07	repressive									1
ELK4	HEK293	-2.88	-3	0.00312927	repressive									1
ELK4	HeLa-S3	-2.87	-2.96	9.68233e-06	repressive									1
EP300	A549	-2.91	-2.78	3.80433e-05	promoting									1
EP300	GM12878	-2.91	-2.78	1.61226e-05	promoting									1
EP300	H1-hESC	-2.9	-2.86	0.512096	none									1
EP300	HeLa-S3	-2.91	-2.37	4.32617e-19	promoting									1
EP300	HepG2	-2.9	-2.83	0.00107974	promoting									1
EP300	K562	-2.9	-2.86	0.104307	none									1
EP300	SK-N-SH_RA	-2.91	-2.81	0.00162925	promoting									1
EP300	T-47D	-2.9	-2.82	0.0614575	none									1
ESR1	ECC-1	-2.89	-2.85	0.496702	none									1
ESR1	T-47D	-2.9	-2.5	0.000101304	promoting									1
ESRRA	HepG2	-2.89	-2.96	0.314362	none									1
ETS1	A549	-2.85	-3.01	1.84926e-13	repressive									1
ETS1	GM12878	-2.88	-2.94	0.000379418	repressive									1
ETS1	K562	-2.89	-2.9	0.0926088	none
EZH2	Dnd41	-2.9	-2.5	3.95811e-12	promoting
EZH2	GM12878	-2.9	-2.63	1.6929e-07	promoting
EZH2	H1-hESC	-2.89	-2.83	0.120457	none
EZH2	HeLa-S3	-2.89	-2.85	0.936397	none
EZH2	HepG2	-2.9	-2.72	2.3908e-05	promoting
EZH2	HMEC	-2.89	-2.94	0.649286	none
EZH2	HSMM	-2.89	-3.01	0.625931	none
EZH2	HSMMtube	-2.89	-2.97	0.641817	none
EZH2	HUVEC	-2.88	-2.98	0.62422	none
EZH2	K562	-2.89	-2.58	0.0119889	none
EZH2	NH-A	-2.88	-2.94	0.550172	none
EZH2	NHDF-Ad	-2.88	-2.95	0.98475	none
EZH2	NHEK	-2.89	-2.91	0.745579	none
EZH2	NHLF	-2.88	-2.98	0.332072	none
FAM48A	HeLa-S3	-2.89	-2.68	0.838174	none
FOS	GM12878	-2.89	-2.85	0.137113	none
FOS	HeLa-S3	-2.89	-2.83	0.154621	none
FOS	HUVEC	-2.92	-2.7	6.80421e-14	promoting
FOS	K562	-2.9	-2.84	0.013618	none
FOS	MCF10A-Er-Src	-2.93	-2.71	1.19559e-21	promoting
FOSL1	H1-hESC	-2.89	-2.89	0.482424	none
FOSL1	K562	-2.9	-2.8	0.284143	none
FOSL2	A549	-2.9	-2.78	0.000107048	promoting
FOSL2	HepG2	-2.9	-2.85	0.0265606	none
FOXA1	A549	-2.89	-2.55	0.0015103	promoting
FOXA1	ECC-1	-2.89	-2.8	0.0545595	none
FOXA1	HepG2	-2.91	-2.82	2.86963e-05	promoting
FOXA1	T-47D	-2.91	-2.78	6.71699e-07	promoting
FOXA2	HepG2	-2.9	-2.79	0.000157078	promoting
FOXM1	GM12878	-2.91	-2.81	5.1308e-06	promoting
FOXP2	PFSK-1	-2.91	-2.86	0.0947823	none
FOXP2	SK-N-MC	-2.9	-2.86	0.57172	none
GABPA	A549	-2.87	-2.93	5.18117e-05	repressive
GABPA	GM12878	-2.84	-2.98	1.94655e-13	repressive
GABPA	H1-hESC	-2.85	-3.06	6.94375e-17	repressive
GABPA	HeLa-S3	-2.86	-2.96	5.57963e-08	repressive
GABPA	HepG2	-2.87	-2.92	0.000175299	repressive
GABPA	K562	-2.86	-2.94	8.80275e-07	repressive
GATA1	K562	-2.89	-2.91	0.924807	none
GATA1	PBDE	-2.91	-2.82	0.00303874	promoting
GATA1	PBDEFetal	-2.89	-2.79	0.205539	none
GATA2	HUVEC	-2.91	-2.57	1.12783e-12	promoting
GATA2	K562	-2.9	-2.8	0.00794427	promoting
GATA2	SH-SY5Y	-2.9	-2.8	0.00407325	promoting
GATA3	MCF-7	-2.89	-2.81	0.340407	none
GATA3	SH-SY5Y	-2.89	-2.77	0.168333	none
GATA3	T-47D	-2.91	-2.75	6.84663e-07	promoting
GRp20	HepG2	-2.88	-3.06	0.000284734	repressive
GTF2B	K562	-2.92	-2.72	8.9422e-12	promoting
GTF2F1	H1-hESC	-2.91	-2.8	2.73397e-05	promoting
GTF2F1	HeLa-S3	-2.92	-2.8	1.19487e-06	promoting
GTF2F1	K562	-2.91	-2.8	2.73397e-05	promoting
GTF3C2	HeLa-S3	-2.89	-2.82	0.178479	none
GTF3C2	K562	-2.89	-3.03	0.128545	none
HDAC1	K562	-2.91	-2.86	0.0263021	none
HDAC2	H1-hESC	-2.9	-2.74	0.000249431	promoting
HDAC2	HepG2	-2.91	-2.83	0.00207162	promoting
HDAC2	K562	-2.9	-2.85	0.0597984	none
HDAC6	K562	-2.89	-2.8	0.181635	none
HDAC8	K562	-2.89	-3.03	0.0146824	none
HMGN3	K562	-2.92	-2.85	0.0458639	none
HNF4A	HepG2	-2.89	-2.88	0.719407	none
HNF4G	HepG2	-2.9	-2.85	0.0841667	none
HSF1	HepG2	-2.89	-2.91	0.671496	none
IKZF1	GM12878	-2.9	-2.33	4.15961e-12	promoting
IRF1	K562	-2.92	-2.87	0.109964	none
IRF3	HeLa-S3	-2.89	-2.84	0.296079	none
IRF3	HepG2	-2.89	-2.9	0.796754	none
IRF4	GM12878	-2.9	-2.82	0.048855	none
JUN	H1-hESC	-2.89	-2.84	0.632367	none
JUN	HeLa-S3	-2.9	-2.69	2.62929e-07	promoting
JUN	HepG2	-2.89	-2.8	0.0395583	none
JUN	HUVEC	-2.9	-2.72	4.8851e-07	promoting
JUN	K562	-2.89	-2.88	0.603509	none
JUNB	K562	-2.89	-2.9	0.908793	none
JUND	GM12878	-2.89	-2.78	0.763422	none
JUND	H1-hESC	-2.89	-2.88	0.765541	none
JUND	HeLa-S3	-2.9	-2.76	1.90652e-07	promoting
JUND	HepG2	-2.9	-2.87	0.0941551	none
JUND	K562	-2.91	-2.86	0.0670216	none
KAP1	HEK293	-2.91	-2.82	0.018231	none
KAP1	K562	-2.89	-2.95	0.898008	none
KAP1	U2OS	-2.89	-2.87	0.786388	none
KDM5A	H1-hESC	-2.87	-3.05	9.32054e-11	repressive
KDM5B	K562	-2.96	-2.83	9.50318e-07	promoting
MAFF	HepG2	-2.9	-2.77	0.00169243	promoting
MAFF	K562	-2.89	-2.85	0.607808	none
MAFK	H1-hESC	-2.9	-2.72	0.00391846	promoting
MAFK	HeLa-S3	-2.89	-2.86	0.285995	none
MAFK	HepG2	-2.9	-2.8	0.0142832	none
MAFK	IMR90	-2.9	-2.75	0.000259951	promoting
MAFK	K562	-2.89	-2.83	0.260391	none
MAX	A549	-2.91	-2.84	0.00345861	promoting
MAX	GM12878	-2.93	-2.84	0.00155922	promoting
MAX	H1-hESC	-2.9	-2.84	0.0304384	none
MAX	HeLa-S3	-2.99	-2.82	9.40077e-13	promoting
MAX	HepG2	-2.93	-2.83	0.00022026	promoting
MAX	HUVEC	-2.91	-2.83	0.0425	none
MAX	K562	-2.97	-2.85	0.00057199	promoting
MAX	NB4	-2.96	-2.82	2.61564e-08	promoting
MAZ	GM12878	-2.93	-2.85	0.0101391	none
MAZ	HeLa-S3	-2.92	-2.85	0.0343537	none
MAZ	HepG2	-2.9	-2.87	0.57172	none
MAZ	K562	-2.94	-2.86	0.0380017	none
MBD4	HepG2	-2.89	-2.85	0.0371124	none
MEF2A	GM12878	-2.9	-2.84	0.316097	none
MEF2A	K562	-2.89	-2.95	0.366711	none
MEF2C	GM12878	-2.89	-2.85	0.674434	none
MTA3	GM12878	-2.89	-2.88	0.31165	none
MXI1	GM12878	-2.91	-2.86	0.147171	none
MXI1	H1-hESC	-2.88	-2.91	0.0365101	none
MXI1	HeLa-S3	-2.91	-2.86	0.163175	none
MXI1	HepG2	-2.91	-2.87	0.282282	none
MXI1	K562	-2.88	-2.92	0.0467042	none
MYBL2	HepG2	-2.91	-2.84	0.00147016	promoting
MYC	GM12878	-2.9	-2.86	0.612087	none
MYC	H1-hESC	-2.9	-2.86	0.266817	none
MYC	HeLa-S3	-2.91	-2.84	0.00496755	promoting
MYC	HepG2	-2.9	-2.84	0.034922	none
MYC	HUVEC	-2.9	-2.85	0.153074	none
MYC	K562	-2.94	-2.86	0.0209964	none
MYC	MCF10A-Er-Src	-2.94	-2.82	2.64006e-08	promoting
MYC	MCF-7	-2.97	-2.84	6.4e-07	promoting
MYC	NB4	-2.96	-2.81	3.27619e-08	promoting
NANOG	H1-hESC	-2.89	-2.91	0.898008	none
NFATC1	GM12878	-2.9	-2.8	0.0611735	none
NFE2	GM12878	-2.89	-2.89	0.762895	none
NFE2	K562	-2.89	-2.94	0.788996	none
NFIC	GM12878	-2.9	-2.82	0.000620355	promoting
NFIC	HepG2	-2.9	-2.87	0.219507	none
NFYA	GM12878	-2.89	-2.85	0.313405	none
NFYA	HeLa-S3	-2.91	-2.83	0.00755496	promoting
NFYA	K562	-2.9	-2.85	0.140262	none
NFYB	GM12878	-2.92	-2.81	1.81655e-05	promoting
NFYB	HeLa-S3	-2.91	-2.81	0.000175299	promoting
NFYB	K562	-2.9	-2.84	0.0238275	none
NR2C2	GM12878	-2.88	-3.03	0.00169843	repressive
NR2C2	HeLa-S3	-2.88	-2.97	5.50032e-05	repressive
NR2C2	HepG2	-2.87	-2.99	8.6037e-07	repressive
NR2C2	K562	-2.88	-3.06	0.000551615	repressive
NR2F2	K562	-2.89	-2.88	0.973421	none
NR3C1	A549	-2.92	-2.81	0.000184974	promoting
NR3C1	ECC-1	-2.9	-2.61	2.05367e-07	promoting
NRF1	GM12878	-2.89	-2.89	0.148191	none
NRF1	H1-hESC	-2.89	-2.9	0.150639	none
NRF1	HeLa-S3	-2.88	-2.94	0.00879805	repressive
NRF1	HepG2	-2.89	-2.94	0.0782982	none
NRF1	K562	-2.89	-2.89	0.154621	none
PAX5	GM12878	-2.9	-2.87	0.140876	none
PAX5	GM12891	-2.89	-2.85	0.373528	none
PAX5	GM12892	-2.91	-2.85	0.0289811	none
PBX3	GM12878	-2.89	-2.92	0.307336	none
PHF8	K562	-2.97	-2.85	1.71036e-05	promoting
PML	GM12878	-2.91	-2.86	0.0566506	none
PML	K562	-2.91	-2.85	0.0222057	none
POU2F2	GM12878	-2.91	-2.84	0.00162925	promoting
POU2F2	GM12891	-2.91	-2.84	0.000960971	promoting
POU5F1	H1-hESC	-2.89	-2.98	0.588217	none
PPARGC1A	HepG2	-2.89	-2.93	0.710054	none
PRDM1	HeLa-S3	-2.89	-2.76	0.000457902	promoting
RAD21	A549	-2.9	-2.78	0.000197696	promoting
RAD21	GM12878	-2.91	-2.77	7.03819e-06	promoting
RAD21	H1-hESC	-2.92	-2.79	1.32296e-08	promoting
RAD21	HeLa-S3	-2.91	-2.77	1.63244e-07	promoting
RAD21	HepG2	-2.91	-2.81	5.30897e-05	promoting
RAD21	IMR90	-2.91	-2.76	1.18719e-09	promoting
RAD21	K562	-2.9	-2.85	0.181635	none
RAD21	SK-N-SH_RA	-2.92	-2.77	2.54696e-13	promoting
RBBP5	H1-hESC	-2.98	-2.79	1.25128e-17	promoting
RBBP5	K562	-2.94	-2.84	0.00345861	promoting
RCOR1	GM12878	-2.89	-2.91	0.267429	none
RCOR1	HeLa-S3	-2.91	-2.84	0.00333085	promoting
RCOR1	HepG2	-2.88	-2.92	0.371976	none
RCOR1	K562	-2.91	-2.84	0.000840837	promoting
RDBP	K562	-2.9	-2.47	4.49766e-07	promoting
RELA	GM10847	-2.91	-2.81	0.000629975	promoting
RELA	GM12878	-2.91	-2.8	5.30897e-05	promoting
RELA	GM12891	-2.92	-2.83	6.25692e-05	promoting
RELA	GM12892	-2.9	-2.83	0.00211121	promoting
RELA	GM15510	-2.91	-2.84	0.0639876	none
RELA	GM18505	-2.9	-2.8	0.00541802	promoting
RELA	GM18526	-2.9	-2.74	4.11358e-05	promoting
RELA	GM18951	-2.9	-2.87	0.0689908	none
RELA	GM19099	-2.9	-2.77	0.000228101	promoting
RELA	GM19193	-2.9	-2.77	0.00162925	promoting
REST	A549	-2.89	-2.88	0.671496	none
REST	GM12878	-2.9	-2.85	0.422452	none
REST	H1-hESC	-2.9	-2.82	0.0618981	none
REST	HeLa-S3	-2.9	-2.82	0.0311962	none
REST	HepG2	-2.91	-2.87	0.540069	none
REST	K562	-2.9	-2.83	0.0414402	none
REST	PANC-1	-2.89	-2.93	0.342457	none
REST	PFSK-1	-2.9	-2.8	0.0150205	none
REST	SK-N-SH	-2.91	-2.87	0.407651	none
REST	U87	-2.9	-2.87	0.588217	none
RFX5	GM12878	-2.9	-2.81	0.0163942	none
RFX5	H1-hESC	-2.89	-2.81	0.169266	none
RFX5	HeLa-S3	-2.92	-2.81	7.45846e-06	promoting
RFX5	HepG2	-2.89	-2.88	0.684653	none
RFX5	K562	-2.89	-2.86	0.342057	none
RPC155	HeLa-S3	-2.89	-2.74	0.219507	none
RPC155	K562	-2.89	-2.94	0.446083	none
RUNX3	GM12878	-2.93	-2.84	0.000259437	promoting
RXRA	GM12878	-2.89	-2.94	0.177582	none
RXRA	H1-hESC	-2.89	-2.91	0.898008	none
RXRA	HepG2	-2.89	-2.86	0.554691	none
SAP30	K562	-2.9	-2.88	0.943687	none
SETDB1	K562	-2.89	-2.88	0.671496	none
SETDB1	U2OS	-2.9	-2.75	0.000805	promoting
SIN3A	GM12878	-2.9	-2.87	0.540069	none
SIN3A	H1-hESC	-2.91	-2.86	0.266202	none
SIN3AK20	A549	-2.9	-2.85	0.254478	none
SIN3AK20	H1-hESC	-2.89	-2.9	0.594652	none
SIN3AK20	HepG2	-2.93	-2.85	0.0106244	none
SIN3AK20	K562	-2.89	-2.89	0.37875	none
SIN3AK20	PANC-1	-2.93	-2.79	2.929e-06	promoting
SIN3AK20	PFSK-1	-2.91	-2.73	1.36281e-08	promoting
SIN3AK20	SK-N-SH	-2.93	-2.83	2.12461e-05	promoting
SIRT6	K562	-2.89	-2.89	0.803361	none
SIX5	A549	-2.85	-3.04	2.0705e-17	repressive
SIX5	GM12878	-2.84	-3.03	4.545e-24	repressive
SIX5	H1-hESC	-2.87	-3.05	6.14838e-12	repressive
SIX5	K562	-2.85	-3.04	1.47171e-18	repressive
SMARCA4	HeLa-S3	-2.89	-2.74	0.0122998	none
SMARCA4	K562	-2.89	-2.86	0.795242	none
SMARCB1	HeLa-S3	-2.91	-2.82	0.00107974	promoting
SMARCB1	K562	-2.89	-2.88	0.899273	none
SMARCC1	HeLa-S3	-2.9	-2.8	0.0061496	promoting
SMARCC2	HeLa-S3	-2.89	-2.87	0.817469	none
SMC3	GM12878	-2.9	-2.78	0.00312927	promoting
SMC3	HeLa-S3	-2.91	-2.81	7.92897e-07	promoting
SMC3	HepG2	-2.9	-2.8	0.00406921	promoting
SMC3	K562	-2.89	-2.91	0.393998	none
SP1	GM12878	-2.9	-2.87	0.430096	none
SP1	H1-hESC	-2.9	-2.88	0.447695	none
SP1	HepG2	-2.9	-2.86	0.0213861	none
SP1	K562	-2.9	-2.86	0.388838	none
SP2	H1-hESC	-2.87	-2.99	0.000436615	repressive
SP2	HepG2	-2.88	-3.05	4.51842e-05	repressive
SP2	K562	-2.87	-2.98	8.62195e-05	repressive
SP4	H1-hESC	-2.88	-2.93	0.00309095	repressive
SPI1	GM12878	-2.91	-2.8	1.71036e-05	promoting
SPI1	GM12891	-2.91	-2.82	0.000280856	promoting
SPI1	K562	-2.9	-2.86	0.19023	none
SREBP1	HepG2	-2.88	-2.93	0.305557	none
SRF	GM12878	-2.87	-2.94	2.1561e-05	repressive
SRF	H1-hESC	-2.88	-2.99	0.000380733	repressive
SRF	HepG2	-2.88	-2.96	0.0201637	none
SRF	K562	-2.87	-3	2.98409e-06	repressive
STAT1	GM12878	-2.9	-2.77	0.0147028	none
STAT1	HeLa-S3	-2.9	-2.85	0.0146431	none
STAT1	K562	-2.89	-2.87	0.144699	none
STAT2	K562	-2.9	-2.77	0.000231623	promoting
STAT3	GM12878	-2.89	-2.87	0.321592	none
STAT3	HeLa-S3	-2.9	-2.55	2.20517e-12	promoting
STAT3	MCF10A-Er-Src	-2.93	-2.71	5.3833e-21	promoting
STAT5A	GM12878	-2.9	-2.84	0.172983	none
STAT5A	K562	-2.89	-2.87	0.898008	none
SUZ12	H1-hESC	-2.89	-3.12	0.0124821	none
SUZ12	NT2-D1	-2.89	-2.86	0.801872	none
TAF1	A549	-2.92	-2.84	0.00079393	promoting
TAF1	GM12878	-2.93	-2.85	0.000851569	promoting
TAF1	GM12891	-2.92	-2.85	0.0159764	none
TAF1	GM12892	-2.92	-2.85	0.0106244	none
TAF1	H1-hESC	-3.03	-2.81	4.27567e-22	promoting
TAF1	HeLa-S3	-2.97	-2.82	9.36936e-11	promoting
TAF1	HepG2	-2.96	-2.85	2.86963e-05	promoting
TAF1	K562	-2.94	-2.85	0.0122998	none
TAF1	PFSK-1	-2.93	-2.8	2.90799e-05	promoting
TAF1	SK-N-SH	-2.97	-2.82	3.35902e-09	promoting
TAF7	H1-hESC	-2.95	-2.8	2.25672e-12	promoting
TAF7	K562	-2.89	-2.88	0.430274	none
TAL1	K562	-2.9	-2.8	4.78595e-05	promoting
TBL1XR1	GM12878	-2.9	-2.86	0.625931	none
TBL1XR1	K562	-2.88	-2.91	0.185258	none
TBP	GM12878	-2.94	-2.8	6.31837e-11	promoting
TBP	H1-hESC	-3	-2.8	6.43875e-18	promoting
TBP	HeLa-S3	-2.97	-2.8	1.04108e-16	promoting
TBP	HepG2	-2.95	-2.82	2.43974e-08	promoting
TBP	K562	-2.95	-2.84	0.000235947	promoting
TCF12	A549	-2.89	-2.88	0.795242	none
TCF12	GM12878	-2.9	-2.86	0.00933366	promoting
TCF12	H1-hESC	-2.89	-2.9	0.721118	none
TCF12	HepG2	-2.89	-2.7	0.013618	none
TCF3	GM12878	-2.92	-2.8	6.73333e-08	promoting
TCF7L2	HCT-116	-2.93	-2.82	3.48184e-07	promoting
TCF7L2	HEK293	-2.9	-2.77	0.00102942	promoting
TCF7L2	HeLa-S3	-2.92	-2.8	1.12829e-06	promoting
TCF7L2	HepG2	-2.89	-2.56	0.0972201	none
TCF7L2	MCF-7	-2.9	-2.74	6.47031e-05	promoting
TCF7L2	PANC-1	-2.91	-2.81	0.00211121	promoting
TEAD4	H1-hESC	-2.91	-2.78	9.24303e-05	promoting
TEAD4	HepG2	-2.9	-2.74	7.16395e-06	promoting
TEAD4	K562	-2.9	-2.86	0.0414702	none
TFAP2A	HeLa-S3	-2.93	-2.77	4.41687e-09	promoting
TFAP2C	HeLa-S3	-2.95	-2.77	6.53694e-15	promoting
THAP1	K562	-2.87	-3	2.41204e-08	repressive
TRIM28	K562	-2.89	-2.88	0.878261	none
UBTF	K562	-2.95	-2.79	1.21561e-12	promoting
USF1	A549	-2.91	-2.84	0.0243671	none
USF1	GM12878	-2.9	-2.87	0.246504	none
USF1	H1-hESC	-2.9	-2.86	0.0542468	none
USF1	HepG2	-2.9	-2.85	0.0509919	none
USF1	K562	-2.89	-2.89	0.988917	none
USF1	SK-N-SH_RA	-2.9	-2.88	0.202	none
USF2	GM12878	-2.9	-2.86	0.219507	none
USF2	H1-hESC	-2.9	-2.83	0.0114544	none
USF2	HeLa-S3	-2.9	-2.86	0.104307	none
USF2	HepG2	-2.9	-2.84	0.209059	none
USF2	K562	-2.89	-2.87	0.594652	none
WRNIP1	GM12878	-2.9	-2.83	0.0801246	none
YY1	A549	-2.88	-2.91	0.0365572	none
YY1	GM12878	-2.9	-2.88	0.912291	none
YY1	GM12891	-2.87	-2.92	0.00864862	repressive
YY1	GM12892	-2.88	-2.9	0.0745107	none
YY1	H1-hESC	-2.88	-2.91	0.154068	none
YY1	HCT-116	-2.89	-2.9	0.158431	none
YY1	HepG2	-2.91	-2.87	0.800377	none
YY1	K562	-2.92	-2.87	0.540069	none
YY1	NT2-D1	-2.87	-2.96	9.74353e-08	repressive
YY1	SK-N-SH_RA	-2.87	-2.91	0.00296413	repressive
ZBTB33	A549	-2.88	-2.92	0.00338093	repressive
ZBTB33	GM12878	-2.89	-2.89	0.295547	none
ZBTB33	HCT-116	-2.89	-2.88	0.96622	none
ZBTB33	HepG2	-2.89	-2.9	0.313885	none
ZBTB33	K562	-2.89	-2.92	0.0794451	none
ZBTB7A	HepG2	-2.9	-2.85	0.108493	none
ZBTB7A	K562	-2.9	-2.88	0.985808	none
ZEB1	GM12878	-2.89	-2.88	0.690823	none
ZKSCAN1	HeLa-S3	-2.89	-2.92	0.588217	none
ZNF143	GM12878	-2.85	-2.97	1.92066e-09	repressive
ZNF143	H1-hESC	-2.86	-2.95	2.36496e-05	repressive
ZNF143	HeLa-S3	-2.86	-2.97	1.28414e-08	repressive
ZNF143	K562	-2.87	-2.94	7.2321e-05	repressive
ZNF217	MCF-7	-2.89	-2.59	0.0154818	none
ZNF263	HEK293-T-REx	-2.93	-2.8	1.41229e-09	promoting
ZNF263	K562	-2.9	-2.8	0.0235548	none
ZNF274	GM08714	-2.89	-4.29	0.136777	none
ZNF274	GM12878	-2.89	-4.29	0.2525	none
ZNF274	HeLa-S3	-2.89	-4.29	0.2525	none
ZNF274	HepG2	-2.89	-4.7	0.0607278	none
ZNF274	K562	-2.89	-2.85	0.684653	none
ZNF274	NT2-D1	-2.89	-4.29	0.549115	none
ZZZ3	GM12878	-2.89	-3.1	0.0239211	none
ZZZ3	HeLa-S3	-2.89	-2.87	0.979578	none

## Sheet: Summary
Regulatory-protein	Number-of-sample	Promoting-GEP (adjusted p<0.01)	Repressing-GEP (adjusted p<0.01)	Conclusion
ARID3A	2	0	0	no effect
ATF1	1	0	0	no effect
ATF2	2	1	0	inconclusive
ATF3	5	0	3	inconclusive
BACH1	2	0	0	no effect
BATF	1	1	0	possibly-Promoting
BCL11A	2	1	0	inconclusive
BCL3	3	0	0	no effect
BCLAF1	2	0	0	no effect
BDP1	2	0	0	no effect
BHLHE40	4	1	0	inconclusive
BRCA1	4	0	0	no effect
BRF1	2	0	0	no effect
BRF2	2	0	0	no effect
CBX3	1	0	0	no effect
CCNT2	1	1	0	possibly-Promoting
CEBPB	7	7	0	Promoting (100%)
CEBPD	1	1	0	possibly-Promoting
CHD1	3	3	0	possibly-Promoting
CHD2	5	1	0	inconclusive
CREB1	1	1	0	possibly-Promoting
CTBP2	1	1	0	possibly-Promoting
CTCF	70	66	0	Promoting (94.3%)
CTCFL	1	0	0	no effect
E2F1	2	2	0	possibly-Promoting
E2F4	4	3	0	possibly-Promoting
E2F6	2	2	0	possibly-Promoting
EBF1	1	1	0	possibly-Promoting
EGR1	3	0	0	no effect
ELF1	4	0	1	inconclusive
ELK1	3	0	3	possibly-Repressive
ELK4	2	0	2	possibly-Repressive
EP300	8	5	0	inconclusive
ESR1	2	1	0	inconclusive
ESRRA	1	0	0	no effect
ETS1	3	0	2	inconclusive
EZH2	14	3	0	inconclusive
FAM48A	1	0	0	no effect
FOS	5	2	0	inconclusive
FOSL1	2	0	0	no effect
FOSL2	2	1	0	inconclusive
FOXA1	4	3	0	possibly-Promoting
FOXA2	1	1	0	possibly-Promoting
FOXM1	1	1	0	possibly-Promoting
FOXP2	2	0	0	no effect
GABPA	6	0	6	Repressive (100%)
GATA1	3	1	0	inconclusive
GATA2	3	3	0	possibly-Promoting
GATA3	3	1	0	inconclusive
GRp20	1	0	1	possibly-Repressive
GTF2B	1	1	0	possibly-Promoting
GTF2F1	3	3	0	possibly-Promoting
GTF3C2	2	0	0	no effect
HDAC1	1	0	0	no effect
HDAC2	3	2	0	inconclusive
HDAC6	1	0	0	no effect
HDAC8	1	0	0	no effect
HMGN3	1	0	0	no effect
HNF4A	1	0	0	no effect
HNF4G	1	0	0	no effect
HSF1	1	0	0	no effect
IKZF1	1	1	0	possibly-Promoting
IRF1	1	0	0	no effect
IRF3	2	0	0	no effect
IRF4	1	0	0	no effect
JUN	5	2	0	inconclusive
JUNB	1	0	0	no effect
JUND	5	1	0	inconclusive
KAP1	3	0	0	no effect
KDM5A	1	0	1	possibly-Repressive
KDM5B	1	1	0	possibly-Promoting
MAFF	2	1	0	inconclusive
MAFK	5	2	0	inconclusive
MAX	8	6	0	possibly-Promoting
MAZ	4	0	0	no effect
MBD4	1	0	0	no effect
MEF2A	2	0	0	no effect
MEF2C	1	0	0	no effect
MTA3	1	0	0	no effect
MXI1	5	0	0	no effect
MYBL2	1	1	0	possibly-Promoting
MYC	9	4	0	inconclusive
NANOG	1	0	0	no effect
NFATC1	1	0	0	no effect
NFE2	2	0	0	no effect
NFIC	2	1	0	inconclusive
NFYA	3	1	0	inconclusive
NFYB	3	2	0	inconclusive
NR2C2	4	0	4	Repressive (100%)
NR2F2	1	0	0	no effect
NR3C1	2	2	0	possibly-Promoting
NRF1	5	0	1	inconclusive
PAX5	3	0	0	no effect
PBX3	1	0	0	no effect
PHF8	1	1	0	possibly-Promoting
PML	2	0	0	no effect
POU2F2	2	2	0	possibly-Promoting
POU5F1	1	0	0	no effect
PPARGC1A	1	0	0	no effect
PRDM1	1	1	0	possibly-Promoting
RAD21	8	7	0	Promoting (87.5%)
RBBP5	2	2	0	possibly-Promoting
RCOR1	4	2	0	inconclusive
RDBP	1	1	0	possibly-Promoting
RELA	10	8	0	Promoting (80%)
REST	10	0	0	no effect
RFX5	5	1	0	inconclusive
RPC155	2	0	0	no effect
RUNX3	1	1	0	possibly-Promoting
RXRA	3	0	0	no effect
SAP30	1	0	0	no effect
SETDB1	2	1	0	inconclusive
SIN3A	2	0	0	no effect
SIN3AK20	7	3	0	inconclusive
SIRT6	1	0	0	no effect
SIX5	4	0	4	Repressive (100%)
SMARCA4	2	0	0	no effect
SMARCB1	2	1	0	inconclusive
SMARCC1	1	1	0	possibly-Promoting
SMARCC2	1	0	0	no effect
SMC3	4	3	0	possibly-Promoting
SP1	4	0	0	no effect
SP2	3	0	3	possibly-Repressive
SP4	1	0	1	possibly-Repressive
SPI1	3	2	0	inconclusive
SREBP1	1	0	0	no effect
SRF	4	0	3	possibly-Repressive
STAT1	3	0	0	no effect
STAT2	1	1	0	possibly-Promoting
STAT3	3	2	0	inconclusive
STAT5A	2	0	0	no effect
SUZ12	2	0	0	no effect
TAF1	10	7	0	inconclusive
TAF7	2	1	0	inconclusive
TAL1	1	1	0	possibly-Promoting
TBL1XR1	2	0	0	no effect
TBP	5	5	0	Promoting (100%)
TCF12	4	1	0	inconclusive
TCF3	1	1	0	possibly-Promoting
TCF7L2	6	5	0	Promoting (83.3%)
TEAD4	3	2	0	inconclusive
TFAP2A	1	1	0	possibly-Promoting
TFAP2C	1	1	0	possibly-Promoting
THAP1	1	0	1	possibly-Repressive
TRIM28	1	0	0	no effect
UBTF	1	1	0	possibly-Promoting
USF1	6	0	0	no effect
USF2	5	0	0	no effect
WRNIP1	1	0	0	no effect
YY1	10	0	3	inconclusive
ZBTB33	5	0	1	inconclusive
ZBTB7A	2	0	0	no effect
ZEB1	1	0	0	no effect
ZKSCAN1	1	0	0	no effect
ZNF143	4	0	4	Repressive (100%)
ZNF217	1	0	0	no effect
ZNF263	2	1	0	inconclusive
ZNF274	6	0	0	no effect
ZZZ3	2	0	0	no effect
