# Supplementary material for: Multivariable regulation of gene expression plasticity in metazoans
Source: Open Biol. 2019 Dec 4;9(12):190150. doi: 10.1098/rsob.190150 (PMC6936262; doi:10.1098/rsob.190150)
Supplement: Table S11 [file rsob190150supp12.xlsx]

## Sheet: Sheet1
Histone-modifications	Number	Source
Human
H3K36me3	127	ENCODE: E001, E002, E003, E004, E005, E006, E007, E008, E009, E010, E011, E012, E013, E014, E015, E016, E017, E018, E019, E020, E021, E022, E023, E024, E025, E026, E027, E028, E029, E030, E031, E032, E033, E034, E035, E036, E037, E038, E039, E040, E041, E042, E043, E044, E045, E046, E047, E048, E049, E050, E051, E052, E053, E054, E055, E056, E057, E058, E059, E061, E062, E063, E065, E066, E067, E…
H3K79me2	21	ENCODE: E123, E115, E118, E116, E120, E119, E124, E129, E127, E125, E114, E122, E121, E003, E128, E004, E017, E117, E008, E126, E005
H4K20me1	19	ENCODE: E114, E115, E123, E127, E126, E118, E129, E124, E017, E125, E116, E117, E119, E128, E120, E121, E003, E122, E008
Mouse
H3K36me3	20	GSM1156647, GSM1156648, GSM1156649, GSM1156650, GSM1156651, GSM1156652, GSM1323930, GSM1323939, GSM1479206, GSM1479216, GSM1544904, GSM1544905, GSM1544906, GSM1544907, GSM1634802, GSM1634803, GSM1634812, GSM1634813, GSM987803, GSM987807
H3K79me2	14	GSM1098558,, GSM1098564, GSM1412460, GSM1412469, GSM1412478, GSM1412487, GSM1412499, GSM1412508, GSM1412517, GSM1467459, GSM1467468, GSM1534640, GSM1534641, GSE76476
H4K20me1	12	GSM1412462, GSM1412471, GSM1412480, GSM1412489, GSM1412501, GSM1412510, GSM1412519, GSM1544916, GSM1544918, GSM1544921, GSM1180585, GSM1180587
Fly
H3K36me3	10	modENCODE: 301, 302, 303, 620, 931, 932, 3004, 4941, 4950, 5091
H3K79me2	3	modENCODE: 4945, 5100, 5585
H4K20me1	9	modENCODE: 3014, 3285, 3286, 3287, 3699, 4937, 4948, 5109, 5261
Worm
H3K36me3	8	modENCODE: 3553, 3554, 3555, 3556, 3557, 3558, 3559, 3563
H3K79me2	2	modENCODE: 3204, 3321
H4K20me1	6	modENCODE: 3434, 3196, 3538, 6211, GSE67650: L3, embryos
