# Supplementary material for: Multivariable regulation of gene expression plasticity in metazoans
Source: Open Biol. 2019 Dec 4;9(12):190150. doi: 10.1098/rsob.190150 (PMC6936262; doi:10.1098/rsob.190150)
Supplement: Table S12 [file rsob190150supp13.xlsx]

## Sheet: Human
H3K36me3						H3K79me2						H4K20me1
Sample	Median-GEP-with-modification	Median-GEP-without-modification	GEP-with < GEP-without	Mann–Whitney U test, Benjamini–Hochberg corrected p < 0.01		Sample	Median-GEP-with-modification	Median-GEP-without-modification	GEP-with < GEP-without	Mann–Whitney U test, Benjamini–Hochberg corrected p < 0.01		Sample	Median-GEP-with-modification	Median-GEP-without-modification	GEP-with < GEP-without	Mann–Whitney U test, Benjamini–Hochberg corrected p < 0.01
E059	-3.02938	-2.82046	Yes	Yes		E123	-2.97909	-2.84529	Yes	Yes		E114	-3.04692	-2.82342	Yes	Yes
E070	-3.00375	-2.82164	Yes	Yes		E115	-2.97796	-2.84353	Yes	Yes		E115	-3.01159	-2.82113	Yes	Yes
E056	-2.96906	-2.78707	Yes	Yes		E118	-2.97949	-2.86428	Yes	Yes		E123	-3.02292	-2.84011	Yes	Yes
E099	-2.99275	-2.81472	Yes	Yes		E116	-2.97109	-2.8522	Yes	Yes		E127	-3.00272	-2.8428	Yes	Yes
E113	-2.96016	-2.80018	Yes	Yes		E120	-2.95043	-2.86197	Yes	Yes		E126	-2.97138	-2.84788	Yes	Yes
E107	-2.98051	-2.81594	Yes	Yes		E119	-2.95138	-2.85663	Yes	Yes		E118	-3.0386	-2.86502	Yes	Yes
E112	-2.99303	-2.83002	Yes	Yes		E124	-2.94986	-2.84809	Yes	Yes		E129	-2.9733	-2.84022	Yes	Yes
E082	-2.97449	-2.82149	Yes	Yes		E129	-2.93893	-2.85736	Yes	Yes		E124	-2.97687	-2.83588	Yes	Yes
E073	-2.96533	-2.82001	Yes	Yes		E127	-2.94686	-2.85543	Yes	Yes		E017	-2.96748	-2.84601	Yes	Yes
E128	-2.99545	-2.83537	Yes	Yes		E125	-2.94064	-2.85967	Yes	Yes		E125	-2.96714	-2.84477	Yes	Yes
E018	-2.96533	-2.82746	Yes	Yes		E114	-2.93595	-2.85736	Yes	Yes		E116	-3.06203	-2.86828	Yes	Yes
E034	-2.97483	-2.82552	Yes	Yes		E122	-2.94564	-2.86103	Yes	Yes		E117	-2.93876	-2.84048	Yes	Yes
E115	-2.97013	-2.82838	Yes	Yes		E121	-2.93633	-2.86029	Yes	Yes		E119	-3.05349	-2.87424	Yes	Yes
E081	-3.0152	-2.85319	Yes	Yes		E003	-2.93821	-2.86749	Yes	Yes		E128	-2.99983	-2.87514	Yes	Yes
E080	-2.96533	-2.81695	Yes	Yes		E128	-2.93667	-2.86881	Yes	Yes		E120	-2.94142	-2.87197	Yes	Yes
E091	-2.9733	-2.8289	Yes	Yes		E004	-2.92522	-2.87118	Yes	Yes		E121	-2.93589	-2.86828	Yes	Yes
E030	-2.97886	-2.82746	Yes	Yes		E017	-2.92183	-2.86586	Yes	Yes		E003	-2.90763	-2.86628	Yes	No
E010	-2.96533	-2.82644	Yes	Yes		E117	-2.92939	-2.86428	Yes	No		E122	-2.8744	-2.89518	No	No
E039	-2.969	-2.82511	Yes	Yes		E008	-2.93589	-2.87859	Yes	No		E008	-2.8871	-2.90002	No	No
E089	-2.96787	-2.82634	Yes	Yes		E126	-2.91196	-2.87991	Yes	No
E075	-2.96748	-2.8225	Yes	Yes		E005	-2.90904	-2.87134	Yes	No
E072	-2.95697	-2.82449	Yes	Yes
E118	-2.98325	-2.84006	Yes	Yes
E067	-2.9614	-2.82393	Yes	Yes
E053	-2.97041	-2.83023	Yes	Yes
E044	-2.97302	-2.82654	Yes	Yes
E123	-2.97256	-2.83722	Yes	Yes
E055	-2.95697	-2.81472	Yes	Yes
E069	-2.95904	-2.82501	Yes	Yes
E074	-2.97852	-2.82951	Yes	Yes
E043	-2.96872	-2.83007	Yes	Yes
E033	-2.99384	-2.84228	Yes	Yes
E057	-2.96759	-2.83023	Yes	Yes
E046	-2.97687	-2.83043	Yes	Yes
E062	-2.97041	-2.82449	Yes	Yes
E105	-2.9568	-2.81909	Yes	Yes
E045	-2.97454	-2.83043	Yes	Yes
E110	-2.9771	-2.83465	Yes	Yes
E015	-2.9672	-2.82501	Yes	Yes
E054	-2.96737	-2.8329	Yes	Yes
E050	-2.96877	-2.82746	Yes	Yes
E037	-2.98827	-2.84549	Yes	Yes
E090	-2.96128	-2.82481	Yes	Yes
E032	-2.97483	-2.8289	Yes	Yes
E014	-2.96748	-2.82885	Yes	Yes
E111	-2.96122	-2.83033	Yes	Yes
E019	-2.96929	-2.83702	Yes	Yes
E076	-2.96151	-2.83043	Yes	Yes
E071	-2.96117	-2.82455	Yes	Yes
E058	-2.96016	-2.82506	Yes	Yes
E093	-2.9664	-2.83013	Yes	Yes
E009	-2.95523	-2.83259	Yes	Yes
E041	-2.96838	-2.8329	Yes	Yes
E027	-2.95193	-2.82439	Yes	Yes
E108	-2.95742	-2.83013	Yes	Yes
E051	-2.96145	-2.8289	Yes	Yes
E048	-2.97483	-2.84399	Yes	Yes
E124	-2.96241	-2.83064	Yes	Yes
E092	-2.95461	-2.81777	Yes	Yes
E094	-2.94564	-2.82444	Yes	Yes
E036	-2.96145	-2.83146	Yes	Yes
E103	-2.95876	-2.83084	Yes	Yes
E013	-2.95456	-2.82746	Yes	Yes
E029	-2.96714	-2.83547	Yes	Yes
E047	-2.96748	-2.84565	Yes	Yes
E038	-2.97064	-2.84042	Yes	Yes
E063	-2.95512	-2.83141	Yes	Yes
E049	-2.95043	-2.83547	Yes	Yes
E061	-2.95193	-2.83259	Yes	Yes
E084	-2.95087	-2.83013	Yes	Yes
E011	-2.94658	-2.84053	Yes	Yes
E121	-2.95031	-2.84048	Yes	Yes
E066	-2.95697	-2.83136	Yes	Yes
E127	-2.95244	-2.8329	Yes	Yes
E096	-2.95255	-2.82644	Yes	Yes
E042	-2.95736	-2.83635	Yes	Yes
E068	-2.95121	-2.83465	Yes	Yes
E017	-2.95495	-2.8289	Yes	Yes
E079	-2.94664	-2.82455	Yes	Yes
E116	-2.97381	-2.84986	Yes	Yes
E129	-2.94775	-2.84094	Yes	Yes
E052	-2.94691	-2.84549	Yes	Yes
E003	-2.94331	-2.83887	Yes	Yes
E086	-2.96838	-2.85705	Yes	Yes
E077	-2.95031	-2.83202	Yes	Yes
E020	-2.94953	-2.83753	Yes	Yes
E085	-2.94508	-2.81914	Yes	Yes
E102	-2.94653	-2.84048	Yes	Yes
E078	-2.9443	-2.83774	Yes	Yes
E016	-2.9559	-2.83722	Yes	Yes
E114	-2.94653	-2.84513	Yes	Yes
E024	-2.93236	-2.83635	Yes	Yes
E026	-2.94203	-2.84986	Yes	Yes
E097	-2.94036	-2.8428	Yes	Yes
E022	-2.91888	-2.80078	Yes	Yes
E088	-2.94247	-2.84115	Yes	Yes
E119	-2.95043	-2.85298	Yes	Yes
E005	-2.92939	-2.83202	Yes	Yes
E006	-2.92347	-2.83378	Yes	Yes
E101	-2.94697	-2.83547	Yes	Yes
E012	-2.93854	-2.85038	Yes	Yes
E021	-2.93583	-2.84218	Yes	Yes
E106	-2.94214	-2.8428	Yes	Yes
E025	-2.93468	-2.8495	Yes	Yes
E007	-2.92665	-2.85038	Yes	Yes
E008	-2.92134	-2.84715	Yes	Yes
E109	-2.94564	-2.84866	Yes	Yes
E023	-2.9349	-2.85241	Yes	Yes
E031	-2.97528	-2.86865	Yes	Yes
E065	-2.94353	-2.86197	Yes	Yes
E120	-2.94453	-2.86287	Yes	Yes
E035	-2.94697	-2.86129	Yes	Yes
E125	-2.9344	-2.86197	Yes	Yes
E122	-2.94714	-2.85736	Yes	Yes
E095	-2.93572	-2.85246	Yes	Yes
E126	-2.94009	-2.86964	Yes	Yes
E117	-2.93689	-2.85444	Yes	Yes
E098	-2.91702	-2.85235	Yes	Yes
E002	-2.84845	-2.93799	No	No
E040	-2.92796	-2.86723	Yes	No
E087	-2.91522	-2.87144	Yes	No
E104	-2.90466	-2.86713	Yes	No
E001	-2.91191	-2.87118	Yes	No
E004	-2.82332	-2.9066	No	No
E100	-2.89787	-2.8879	Yes	No
E028	-2.88364	-2.89792	No	No
E083	-2.87313	-2.90817	No	No

## Sheet: Mouse
H3K36me3						H3K79me2						H4K20me1
Sample	Median-GEP-with-modification	Median-GEP-without-modification	GEP-with < GEP-without	Mann–Whitney U test, Benjamini–Hochberg corrected p < 0.01		Sample	Median-GEP-with-modification	Median-GEP-without-modification	GEP-with < GEP-without	Mann–Whitney U test, Benjamini–Hochberg corrected p < 0.01		Sample	Median-GEP-with-modification	Median-GEP-without-modification	GEP-with < GEP-without	Mann–Whitney U test, Benjamini–Hochberg corrected p < 0.01
GSM1479206	-3.73937	-3.55767	Yes	Yes		GSM1534641	-3.69806	-3.55385	Yes	Yes		GSM1544916	-3.72719	-3.56508	Yes	Yes
GSM987803	-3.72147	-3.55453	Yes	Yes		GSM1534640	-3.69441	-3.55385	Yes	Yes		GSM1180587	-3.73581	-3.56884	Yes	Yes
GSM1156648	-3.69376	-3.55605	Yes	Yes		GSM1412487	-3.67355	-3.54683	Yes	Yes		GSM1180585	-3.69255	-3.5655	Yes	Yes
GSM1544904	-3.73629	-3.57407	Yes	Yes		GSM1098558	-3.72642	-3.5845	Yes	Yes		GSM1544918	-3.69181	-3.57373	Yes	Yes
GSM1544905	-3.72109	-3.57141	Yes	Yes		GSE76746	-3.67052	-3.56329	Yes	Yes		GSM1412471	-3.68001	-3.55639	Yes	Yes
GSM1156651	-3.68966	-3.55945	Yes	Yes		GSM1412460	-3.66603	-3.55911	Yes	Yes		GSM1412501	-3.67448	-3.55588	Yes	Yes
GSM987807	-3.69965	-3.55699	Yes	Yes		GSM1412517	-3.66786	-3.55588	Yes	Yes		GSM1412519	-3.66018	-3.56764	Yes	Yes
GSM1156652	-3.68557	-3.55911	Yes	Yes		GSM1412478	-3.66685	-3.55911	Yes	Yes		GSM1412462	-3.66146	-3.57021	Yes	Yes
GSM1634802	-3.68892	-3.55114	Yes	Yes		GSM1412469	-3.66786	-3.55775	Yes	Yes		GSM1544921	-3.79997	-3.59518	Yes	Yes
GSM1634803	-3.68594	-3.5508	Yes	Yes		GSM1467459	-3.67061	-3.57209	Yes	Yes		GSM1412480	-3.75906	-3.58381	Yes	Yes
GSM1156649	-3.67927	-3.55826	Yes	Yes		GSM1467468	-3.66603	-3.56764	Yes	Yes		GSM1412510	-3.6765	-3.56235	Yes	Yes
GSM1156650	-3.68705	-3.56884	Yes	Yes		GSM1412508	-3.66465	-3.56158	Yes	Yes		GSM1412489	-3.66511	-3.56303	Yes	Yes
GSM1634812	-3.68269	-3.55428	Yes	Yes		GSM1412499	-3.66237	-3.56303	Yes	Yes
GSM1634813	-3.679	-3.55894	Yes	Yes		GSM1098564	-3.63388	-3.59972	Yes	No
GSM1544907	-3.78011	-3.59248	Yes	Yes
GSM1544906	-3.74778	-3.59301	Yes	Yes
GSM1323939	-3.64955	-3.56584	Yes	Yes
GSM1479216	-3.64882	-3.59388	Yes	No
GSM1156647	-3.71577	-3.59527	Yes	No
GSM1323930	-3.63388	-3.5782	Yes	No

## Sheet: Fly
H3K36me3						H3K79me2						H4K20me1
Sample	Median-GEP-with-modification	Median-GEP-without-modification	GEP-with < GEP-without	Mann–Whitney U test, Benjamini–Hochberg corrected p < 0.01		Sample	Median-GEP-with-modification	Median-GEP-without-modification	GEP-with < GEP-without	Mann–Whitney U test, Benjamini–Hochberg corrected p < 0.01		Sample	Median-GEP-with-modification	Median-GEP-without-modification	GEP-with < GEP-without	Mann–Whitney U test, Benjamini–Hochberg corrected p < 0.01
modENCODE:620	-2.853	-2.534	Yes	Yes		modENCODE:4945	-2.79	-2.535	yes	yes		modENCODE:3287	-2.796	-2.625	Yes	Yes
modENCODE:931	-2.805	-2.525	Yes	Yes		modENCODE:5100	-2.745	-2.545	yes	yes		modENCODE:3699	-2.74	-2.577	Yes	Yes
modENCODE:932	-2.798	-2.531	Yes	Yes		modENCODE:5585	-2.74	-2.515	yes	yes		modENCODE:4937	-2.761	-2.524	Yes	Yes
modENCODE:3004	-2.767	-2.521	Yes	Yes								modENCODE:4948	-2.732	-2.576	Yes	Yes
modENCODE:4941	-2.762	-2.544	Yes	Yes								modENCODE:5109	-2.729	-2.575	Yes	Yes
modENCODE:4950	-2.772	-2.535	Yes	Yes								modENCODE:5261	-2.847	-2.609	Yes	Yes
modENCODE:5091	-2.771	-2.534	Yes	Yes								modENCODE:3014	-2.776	-2.576	Yes	Yes
modENCODE:301	-2.78	-2.543	Yes	Yes								modENCODE:3285	-2.751	-2.589	Yes	Yes
modENCODE:302	-2.792	-2.541	Yes	Yes								modENCODE:3286	-2.807	-2.618	Yes	Yes
modENCODE:303	-2.768	-2.539	Yes	Yes

## Sheet: Worm
H3K36me3						H3K79me2						H4K20me1
Sample	Median-GEP-with-modification	Median-GEP-without-modification	GEP-with < GEP-without	Mann–Whitney U test, Benjamini–Hochberg corrected p < 0.01		Sample	Median-GEP-with-modification	Median-GEP-without-modification	GEP-with < GEP-without	Mann–Whitney U test, Benjamini–Hochberg corrected p < 0.01		Sample	Median-GEP-with-modification	Median-GEP-without-modification	GEP-with < GEP-without	Mann–Whitney U test, Benjamini–Hochberg corrected p < 0.01
modENCODE:3553	-0.3271	-0.1313	Yes	Yes		modENCODE:3204	-0.3961	-0.1181	Yes	Yes		modENCODE:S3434	-0.3392	-0.1806	Yes	Yes
modENCODE:3554	-0.3557	-0.1238	Yes	Yes		modENCODE:3321	-0.4707	-0.1647	Yes	Yes		modENCODE:S3528	-0.3015	-0.1584	Yes	Yes
modENCODE:3555	-0.4422	-0.1399	Yes	Yes								modENCODE:S3196	-0.3402	-0.1642	Yes	Yes
modENCODE:3556	-0.4259	-0.1301	Yes	Yes								GSE67650:L3	-0.3273	-0.17	Yes	Yes
modENCODE:3557	-0.4301	-0.1324	Yes	Yes								modENCODE:S6211	-0.2314	-0.1815	Yes	No
modENCODE:3558	-0.427	-0.1278	Yes	Yes								GSE67650:embryos	-0.2321	-0.1827	Yes	No
modENCODE:3559	-0.3982	-0.132	Yes	Yes
modENCODE:3563	-0.4056	-0.1278	Yes	Yes
